# Supplementary material for: Infrared Spectra of Small Radicals for Exoplanetary Spectroscopy: OH, NH, CN and CH: The State of Current Knowledge
Source: MDPI journal article supplement (doi:10.3390/molecules28083362), 2023-04-11
Supplement: s1 [file s1]

## **Supplementary Information for “Infrared Spectra of Small Radicals for Exoplanetary Spectroscopy: OH, NH, CN and CH. The State of Current Knowledge”**

This supplementary information provides line lists for all our experimentally observed emission lines of OH, NH, CH, CN radicals. Aside the experimental line positions together with spectroscopic notations, we also provide a comparison with theoretically predicted line positions. These predictions were either taken from the HITRAN database or generated by use of MoLLIST database.

Note: Experimental line positions are entirely original and not compiled from other sources. The estimated accuracy for measured line positions is close to the Doppler width of the lines, between 0.001-0.003  $\text{cm}^{-1}$  in the infrared spectral range.

### **Legend:**

$\nu_{\text{exp}}$  – experimentally observed wavenumber in  $\text{cm}^{-1}$  units

$\nu_{\text{the}}$  – theoretically predicted wavenumber in  $\text{cm}^{-1}$  units (HITRAN or MoLLIST)

GUQ – global upper quanta (spectral notation of the upper state together with the spin-component notation)

GLQ – global lower quanta (spectral notation of the lower state together with the spin-component notation)

$\nu'$  – upper vibrational quantum number

$\nu''$  – lower vibrational quantum number

$J'$  – upper rotational quantum number

$J''$  – lower rotational quantum number

$N'$  – further upper rotational quantum number

$N''$  – further lower rotational quantum number

branch – spectral ‘PQR’ notation of selected emission line

$F'$  – upper quantum number ( $F = I + J$ , where  $I$  is a net nuclear spin –  $F$  therefore corresponds to a total angular momentum of an atom, arising from the coupling of a magnetic moment of an electron and a nuclear magnetic moment)

$F''$  – lower quantum number

Table S1: Emission lines of OH radical in the X<sup>2</sup>Π ground state between 1800-3500 cm<sup>-1</sup>

| <b>v<sub>exp</sub> (cm<sup>-1</sup>)</b> | <b>v<sub>the</sub> (cm<sup>-1</sup>)</b> | <b>GUQ</b>       | <b>GLQ</b>       | <b>v'</b> | <b>v''</b> | <b>J'</b> | <b>J''</b> |
|------------------------------------------|------------------------------------------|------------------|------------------|-----------|------------|-----------|------------|
| 1800.446                                 | 1800.4439                                | X <sub>3/2</sub> | X <sub>1/2</sub> | 2         | 1          | 31.5      | 31.5       |
| 1809.623                                 | 1809.6284                                | X <sub>1/2</sub> | X <sub>1/2</sub> | 3         | 2          | 30.5      | 29.5       |
| 1815.217                                 | 1815.2130                                | X <sub>3/2</sub> | X <sub>3/2</sub> | 2         | 1          | 33.5      | 32.5       |
| 1830.622                                 | 1830.6216                                | X <sub>3/2</sub> | X <sub>1/2</sub> | 10        | 9          | 4.5       | 4.5        |
| 1831.194                                 | 1831.1974                                | X <sub>1/2</sub> | X <sub>1/2</sub> | 11        | 10         | 3.5       | 3.5        |
| 1831.900                                 | 1831.9033                                | X <sub>3/2</sub> | X <sub>1/2</sub> | 9         | 8          | 10.5      | 10.5       |
| 1841.066                                 | 1841.0623                                | X <sub>1/2</sub> | X <sub>1/2</sub> | 9         | 8          | 12.5      | 11.5       |
| 1845.863                                 | 1845.8676                                | X <sub>1/2</sub> | X <sub>1/2</sub> | 11        | 10         | 0.5       | 0.5        |
| 1852.695                                 | 1852.6929                                | X <sub>1/2</sub> | X <sub>1/2</sub> | 10        | 9          | 7.5       | 6.5        |
| 1853.482                                 | 1853.4827                                | X <sub>3/2</sub> | X <sub>1/2</sub> | 5         | 4          | 23.5      | 23.5       |
| 1857.031                                 | 1857.0251                                | X <sub>3/2</sub> | X <sub>1/2</sub> | 4         | 3          | 17.5      | 16.5       |
| 1861.155                                 | 1861.1582                                | X <sub>3/2</sub> | X <sub>1/2</sub> | 7         | 6          | 17.5      | 17.5       |
| 1873.392                                 | 1873.3963                                | X <sub>1/2</sub> | X <sub>1/2</sub> | 2         | 1          | 31.5      | 30.5       |
| 1874.106                                 | 1874.1051                                | X <sub>3/2</sub> | X <sub>3/2</sub> | 8         | 7          | 16.5      | 15.5       |
| 1874.954                                 | 1874.9583                                | X <sub>1/2</sub> | X <sub>3/2</sub> | 12        | 11         | 4.5       | 3.5        |
| 1876.410                                 | 1876.4114                                | X <sub>1/2</sub> | X <sub>3/2</sub> | 1         | 1          | 33.5      | 32.5       |
| 1882.668                                 | 1882.6714                                | X <sub>3/2</sub> | X <sub>1/2</sub> | 5         | 4          | 15.5      | 14.5       |
| 1892.140                                 | 1892.1423                                | X <sub>1/2</sub> | X <sub>1/2</sub> | 6         | 5          | 21.5      | 20.5       |
| 1896.451                                 | 1896.4507                                | X <sub>1/2</sub> | X <sub>3/2</sub> | 0         | 0          | 31.5      | 30.5       |
| 1896.710                                 | 1896.7146                                | X <sub>3/2</sub> | X <sub>1/2</sub> | 3         | 2          | 18.5      | 17.5       |
| 1903.463                                 | 1903.4661                                | X <sub>3/2</sub> | X <sub>1/2</sub> | 3         | 2          | 44.5      | 43.5       |
| 1911.094                                 | 1911.0901                                | X <sub>3/2</sub> | X <sub>3/2</sub> | 11        | 10         | 3.5       | 2.5        |
| 1914.208                                 | 1914.2077                                | X <sub>3/2</sub> | X <sub>1/2</sub> | 2         | 1          | 29.5      | 29.5       |
| 1915.376                                 | 1915.3717                                | X <sub>3/2</sub> | X <sub>3/2</sub> | 9         | 8          | 11.5      | 10.5       |
| 1917.164                                 | 1917.1681                                | X <sub>3/2</sub> | X <sub>1/2</sub> | 1         | 0          | 31.5      | 31.5       |
| 1917.589                                 | 1917.5893                                | X <sub>3/2</sub> | X <sub>1/2</sub> | 10        | 9          | 1.5       | 0.5        |
| 1920.084                                 | 1920.0807                                | X <sub>1/2</sub> | X <sub>1/2</sub> | 8         | 7          | 14.5      | 13.5       |
| 1920.720                                 | 1920.7181                                | X <sub>1/2</sub> | X <sub>1/2</sub> | 9         | 8          | 10.5      | 9.5        |
| 1923.072                                 | 1923.0681                                | X <sub>1/2</sub> | X <sub>1/2</sub> | 10        | 9          | 11.5      | 11.5       |
| 1929.481                                 | 1929.4854                                | X <sub>1/2</sub> | X <sub>1/2</sub> | 11        | 10         | 4.5       | 3.5        |
| 1931.048                                 | 1931.0476                                | X <sub>3/2</sub> | X <sub>3/2</sub> | 3         | 2          | 43.5      | 43.5       |
| 1931.351                                 | 1931.3462                                | X <sub>3/2</sub> | X <sub>1/2</sub> | 10        | 9          | 2.5       | 1.5        |
| 1933.067                                 | 1933.0646                                | X <sub>3/2</sub> | X <sub>1/2</sub> | 9         | 8          | 7.5       | 7.5        |
| 1934.787                                 | 1934.7906                                | X <sub>3/2</sub> | X <sub>1/2</sub> | 4         | 3          | 24.5      | 24.5       |
| 1936.178                                 | 1936.1774                                | X <sub>1/2</sub> | X <sub>3/2</sub> | 3         | 2          | 45.5      | 44.5       |
| 1937.176                                 | 1937.1710                                | X <sub>1/2</sub> | X <sub>3/2</sub> | 2         | 1          | 48.5      | 47.5       |
| 1937.520                                 | 1937.5144                                | X <sub>3/2</sub> | X <sub>3/2</sub> | 10        | 9          | 5.5       | 4.5        |
| 1938.309                                 | 1938.3107                                | X <sub>1/2</sub> | X <sub>1/2</sub> | 11        | 10         | 14.5      | 13.5       |
| 1945.384                                 | 1945.3854                                | X <sub>1/2</sub> | X <sub>3/2</sub> | 2         | 2          | 38.5      | 37.5       |
| 1947.848                                 | 1947.8485                                | X <sub>3/2</sub> | X <sub>3/2</sub> | 11        | 10         | 6.5       | 5.5        |
| 1954.325                                 | 1954.3230                                | X <sub>1/2</sub> | X <sub>3/2</sub> | 12        | 11         | 9.5       | 8.5        |
| 1958.558                                 | 1958.5616                                | X <sub>1/2</sub> | X <sub>1/2</sub> | 9         | 8          | 9.5       | 8.5        |
| 1959.418                                 | 1959.4236                                | X <sub>1/2</sub> | X <sub>3/2</sub> | 2         | 2          | 39.5      | 38.5       |

Table S1 (continued)

| $v_{\text{exp}} (\text{cm}^{-1})$ | $v_{\text{the}} (\text{cm}^{-1})$ | GUQ              | GLQ              | $v'$ | $v''$ | $J'$ | $J''$ |
|-----------------------------------|-----------------------------------|------------------|------------------|------|-------|------|-------|
| 1961.094                          | 1961.0974                         | X <sub>3/2</sub> | X <sub>1/2</sub> | 6    | 5     | 18.5 | 18.5  |
| 1961.361                          | 1961.3609                         | X <sub>3/2</sub> | X <sub>1/2</sub> | 6    | 5     | 12.5 | 11.5  |
| 1962.808                          | 1962.8122                         | X <sub>3/2</sub> | X <sub>1/2</sub> | 5    | 4     | 14.5 | 13.5  |
| 1963.790                          | 1963.7875                         | X <sub>1/2</sub> | X <sub>1/2</sub> | 8    | 7     | 13.5 | 12.5  |
| 1965.611                          | 1965.6111                         | X <sub>3/2</sub> | X <sub>3/2</sub> | 10   | 9     | 4.5  | 3.5   |
| 1966.374                          | 1966.3764                         | X <sub>1/2</sub> | X <sub>1/2</sub> | 11   | 10    | 9.5  | 8.5   |
| 1966.564                          | 1966.5696                         | X <sub>1/2</sub> | X <sub>1/2</sub> | 11   | 10    | 10.5 | 9.5   |
| 1976.236                          | 1976.2361                         | X <sub>1/2</sub> | X <sub>1/2</sub> | 10   | 9     | 8.5  | 8.5   |
| 1977.699                          | 1977.6944                         | X <sub>1/2</sub> | X <sub>1/2</sub> | 10   | 9     | 8.5  | 8.5   |
| 1979.602                          | 1979.5993                         | X <sub>1/2</sub> | X <sub>3/2</sub> | 2    | 2     | 41.5 | 40.5  |
| 1982.445                          | 1982.4416                         | X <sub>1/2</sub> | X <sub>3/2</sub> | 0    | 0     | 32.5 | 31.5  |
| 1987.580                          | 1987.5831                         | X <sub>3/2</sub> | X <sub>3/2</sub> | 6    | 5     | 20.5 | 19.5  |
| 1988.381                          | 1988.3768                         | X <sub>3/2</sub> | X <sub>3/2</sub> | 9    | 8     | 9.5  | 8.5   |
| 1988.920                          | 1988.9222                         | X <sub>3/2</sub> | X <sub>3/2</sub> | 9    | 8     | 9.5  | 8.5   |
| 1992.404                          | 1992.4086                         | X <sub>1/2</sub> | X <sub>1/2</sub> | 10   | 9     | 7.5  | 7.5   |
| 1993.934                          | 1993.9378                         | X <sub>1/2</sub> | X <sub>1/2</sub> | 9    | 8     | 16.5 | 16.5  |
| 1994.580                          | 1994.5761                         | X <sub>3/2</sub> | X <sub>1/2</sub> | 9    | 8     | 3.5  | 2.5   |
| 1995.710                          | 1995.7124                         | X <sub>1/2</sub> | X <sub>1/2</sub> | 9    | 8     | 8.5  | 7.5   |
| 2002.359                          | 2002.3557                         | X <sub>3/2</sub> | X <sub>3/2</sub> | 10   | 9     | 7.5  | 7.5   |
| 2005.428                          | 2005.4248                         | X <sub>1/2</sub> | X <sub>1/2</sub> | 10   | 9     | 6.5  | 6.5   |
| 2006.945                          | 2006.9497                         | X <sub>3/2</sub> | X <sub>3/2</sub> | 4    | 3     | 25.5 | 24.5  |
| 2013.393                          | 2013.3908                         | X <sub>3/2</sub> | X <sub>1/2</sub> | 9    | 8     | 4.5  | 4.5   |
| 2018.329                          | 2018.3278                         | X <sub>1/2</sub> | X <sub>3/2</sub> | 11   | 10    | 4.5  | 4.5   |
| 2018.486                          | 2018.4820                         | X <sub>1/2</sub> | X <sub>3/2</sub> | 11   | 10    | 4.5  | 4.5   |
| 2018.958                          | 2018.9637                         | X <sub>3/2</sub> | X <sub>3/2</sub> | 9    | 8     | 16.5 | 16.5  |
| 2022.899                          | 2022.9029                         | X <sub>1/2</sub> | X <sub>3/2</sub> | 11   | 10    | 6.5  | 6.5   |
| 2027.037                          | 2027.0364                         | X <sub>3/2</sub> | X <sub>1/2</sub> | 2    | 1     | 27.5 | 27.5  |
| 2028.469                          | 2028.4709                         | X <sub>1/2</sub> | X <sub>3/2</sub> | 1    | 1     | 37.5 | 36.5  |
| 2029.116                          | 2029.1208                         | X <sub>1/2</sub> | X <sub>1/2</sub> | 9    | 8     | 15.5 | 15.5  |
| 2032.290                          | 2032.2947                         | X <sub>3/2</sub> | X <sub>1/2</sub> | 5    | 4     | 13.5 | 12.5  |
| 2033.261                          | 2033.2613                         | X <sub>3/2</sub> | X <sub>3/2</sub> | 10   | 9     | 4.5  | 4.5   |
| 2038.596                          | 2038.6013                         | X <sub>3/2</sub> | X <sub>1/2</sub> | 7    | 6     | 13.5 | 13.5  |
| 2041.394                          | 2041.3904                         | X <sub>3/2</sub> | X <sub>3/2</sub> | 8    | 7     | 12.5 | 11.5  |
| 2042.213                          | 2042.2170                         | X <sub>1/2</sub> | X <sub>3/2</sub> | 1    | 1     | 48.5 | 47.5  |
| 2046.502                          | 2046.4982                         | X <sub>1/2</sub> | X <sub>1/2</sub> | 1    | 0     | 47.5 | 47.5  |
| 2052.710                          | 2052.7092                         | X <sub>1/2</sub> | X <sub>3/2</sub> | 1    | 1     | 46.5 | 45.5  |
| 2053.434                          | 2053.4338                         | X <sub>1/2</sub> | X <sub>1/2</sub> | 1    | 0     | 46.5 | 46.5  |
| 2062.792                          | 2062.7909                         | X <sub>3/2</sub> | X <sub>1/2</sub> | 3    | 2     | 24.5 | 24.5  |
| 2066.788                          | 2066.7908                         | X <sub>1/2</sub> | X <sub>1/2</sub> | 9    | 8     | 6.5  | 5.5   |
| 2072.637                          | 2072.6340                         | X <sub>3/2</sub> | X <sub>1/2</sub> | 9    | 8     | 12.5 | 11.5  |
| 2076.034                          | 2076.0376                         | X <sub>1/2</sub> | X <sub>1/2</sub> | 7    | 6     | 14.5 | 13.5  |
| 2077.771                          | 2077.7669                         | X <sub>3/2</sub> | X <sub>1/2</sub> | 8    | 7     | 5.5  | 4.5   |
| 2078.649                          | 2078.6480                         | X <sub>3/2</sub> | X <sub>3/2</sub> | 5    | 4     | 21.5 | 20.5  |

Table S1 (continued)

| $\nu_{\text{exp}} (\text{cm}^{-1})$ | $\nu_{\text{the}} (\text{cm}^{-1})$ | GUQ              | GLQ              | $\nu'$ | $\nu''$ | $J'$ | $J''$ |
|-------------------------------------|-------------------------------------|------------------|------------------|--------|---------|------|-------|
| 2081.875                            | 2081.8743                           | X <sub>1/2</sub> | X <sub>1/2</sub> | 5      | 4       | 20.5 | 19.5  |
| 2083.407                            | 2083.4077                           | X <sub>3/2</sub> | X <sub>3/2</sub> | 6      | 5       | 18.5 | 17.5  |
| 2089.220                            | 2089.2262                           | X <sub>3/2</sub> | X <sub>3/2</sub> | 9      | 8       | 6.5  | 5.5   |
| 2090.101                            | 2090.1048                           | X <sub>1/2</sub> | X <sub>3/2</sub> | 9      | 8       | 16.5 | 15.5  |
| 2093.855                            | 2093.8595                           | X <sub>3/2</sub> | X <sub>3/2</sub> | 4      | 3       | 37.5 | 37.5  |
| 2096.806                            | 2096.8049                           | X <sub>3/2</sub> | X <sub>1/2</sub> | 1      | 0       | 46.5 | 45.5  |
| 2099.631                            | 2099.6357                           | X <sub>3/2</sub> | X <sub>3/2</sub> | 2      | 1       | 28.5 | 27.5  |
| 2100.434                            | 2100.4365                           | X <sub>1/2</sub> | X <sub>1/2</sub> | 9      | 8       | 5.5  | 4.5   |
| 2100.495                            | 2100.5003                           | X <sub>1/2</sub> | X <sub>1/2</sub> | 9      | 8       | 5.5  | 4.5   |
| 2101.576                            | 2101.5764                           | X <sub>1/2</sub> | X <sub>3/2</sub> | 1      | 1       | 42.5 | 41.5  |
| 2102.034                            | 2102.0287                           | X <sub>3/2</sub> | X <sub>3/2</sub> | 2      | 1       | 28.5 | 27.5  |
| 2103.778                            | 2103.7782                           | X <sub>1/2</sub> | X <sub>1/2</sub> | 3      | 2       | 40.5 | 40.5  |
| 2105.372                            | 2105.3676                           | X <sub>3/2</sub> | X <sub>1/2</sub> | 9      | 8       | 1.5  | 0.5   |
| 2108.949                            | 2108.9501                           | X <sub>3/2</sub> | X <sub>3/2</sub> | 3      | 2       | 40.5 | 40.5  |
| 2112.280                            | 2112.2818                           | X <sub>3/2</sub> | X <sub>3/2</sub> | 4      | 3       | 23.5 | 22.5  |
| 2113.806                            | 2113.8113                           | X <sub>1/2</sub> | X <sub>1/2</sub> | 4      | 3       | 22.5 | 21.5  |
| 2117.259                            | 2117.2628                           | X <sub>3/2</sub> | X <sub>3/2</sub> | 2      | 1       | 44.5 | 44.5  |
| 2118.693                            | 2118.6924                           | X <sub>3/2</sub> | X <sub>1/2</sub> | 3      | 1       | 44.5 | 43.5  |
| 2121.644                            | 2121.6466                           | X <sub>1/2</sub> | X <sub>3/2</sub> | 10     | 9       | 5.5  | 4.5   |
| 2124.783                            | 2124.7869                           | X <sub>3/2</sub> | X <sub>1/2</sub> | 8      | 7       | 18.5 | 17.5  |
| 2126.461                            | 2126.4551                           | X <sub>1/2</sub> | X <sub>3/2</sub> | 0      | 0       | 37.5 | 36.5  |
| 2128.449                            | 2128.4549                           | X <sub>3/2</sub> | X <sub>3/2</sub> | 5      | 4       | 20.5 | 19.5  |
| 2130.197                            | 2130.1966                           | X <sub>3/2</sub> | X <sub>3/2</sub> | 6      | 5       | 17.5 | 16.5  |
| 2135.207                            | 2135.2035                           | X <sub>1/2</sub> | X <sub>1/2</sub> | 9      | 8       | 10.5 | 10.5  |
| 2140.712                            | 2140.7082                           | X <sub>3/2</sub> | X <sub>1/2</sub> | 4      | 3       | 20.5 | 20.5  |
| 2141.723                            | 2141.7187                           | X <sub>1/2</sub> | X <sub>1/2</sub> | 10     | 9       | 4.5  | 3.5   |
| 2148.794                            | 2148.7956                           | X <sub>3/2</sub> | X <sub>3/2</sub> | 9      | 8       | 4.5  | 3.5   |
| 2156.356                            | 2156.3581                           | X <sub>1/2</sub> | X <sub>1/2</sub> | 10     | 9       | 5.5  | 4.5   |
| 2160.794                            | 2160.7936                           | X <sub>1/2</sub> | X <sub>1/2</sub> | 3      | 2       | 39.5 | 39.5  |
| 2160.991                            | 2160.9896                           | X <sub>3/2</sub> | X <sub>1/2</sub> | 8      | 7       | 5.5  | 5.5   |
| 2163.779                            | 2163.7839                           | X <sub>1/2</sub> | X <sub>1/2</sub> | 8      | 7       | 8.5  | 7.5   |
| 2170.339                            | 2170.3335                           | X <sub>1/2</sub> | X <sub>1/2</sub> | 1      | 0       | 28.5 | 27.5  |
| 2171.124                            | 2171.1248                           | X <sub>1/2</sub> | X <sub>3/2</sub> | 0      | 0       | 47.5 | 46.5  |
| 2177.009                            | 2177.0139                           | X <sub>3/2</sub> | X <sub>3/2</sub> | 2      | 1       | 43.5 | 43.5  |
| 2178.593                            | 2178.5963                           | X <sub>1/2</sub> | X <sub>3/2</sub> | 9      | 8       | 12.5 | 11.5  |
| 2179.771                            | 2179.7761                           | X <sub>1/2</sub> | X <sub>1/2</sub> | 5      | 4       | 18.5 | 17.5  |
| 2183.221                            | 2183.2194                           | X <sub>3/2</sub> | X <sub>3/2</sub> | 10     | 9       | 8.5  | 7.5   |
| 2190.503                            | 2190.5017                           | X <sub>3/2</sub> | X <sub>3/2</sub> | 10     | 9       | 9.5  | 8.5   |
| 2192.833                            | 2192.8334                           | X <sub>3/2</sub> | X <sub>3/2</sub> | 9      | 8       | 7.5  | 7.5   |
| 2198.935                            | 2198.9365                           | X <sub>3/2</sub> | X <sub>3/2</sub> | 10     | 9       | 11.5 | 10.5  |
| 2210.096                            | 2210.0951                           | X <sub>3/2</sub> | X <sub>1/2</sub> | 1      | 0       | 17.5 | 16.5  |
| 2214.699                            | 2214.7004                           | X <sub>1/2</sub> | X <sub>1/2</sub> | 2      | 1       | 25.5 | 24.5  |
| 2215.091                            | 2215.0889                           | X <sub>1/2</sub> | X <sub>3/2</sub> | 10     | 9       | 1.5  | 1.5   |

Table S1 (continued)

| $\nu_{\text{exp}} (\text{cm}^{-1})$ | $\nu_{\text{the}} (\text{cm}^{-1})$ | GUQ              | GLQ              | $\nu'$ | $\nu''$ | $J'$ | $J''$ |
|-------------------------------------|-------------------------------------|------------------|------------------|--------|---------|------|-------|
| 2218.525                            | 2218.5190                           | X <sub>1/2</sub> | X <sub>1/2</sub> | 8      | 7       | 15.5 | 15.5  |
| 2225.863                            | 2225.8587                           | X <sub>1/2</sub> | X <sub>3/2</sub> | 10     | 9       | 14.5 | 14.5  |
| 2228.441                            | 2228.4435                           | X <sub>1/2</sub> | X <sub>1/2</sub> | 5      | 4       | 17.5 | 16.5  |
| 2230.386                            | 2230.3796                           | X <sub>3/2</sub> | X <sub>1/2</sub> | 4      | 3       | 34.5 | 33.5  |
| 2232.192                            | 2232.1884                           | X <sub>3/2</sub> | X <sub>1/2</sub> | 5      | 4       | 10.5 | 9.5   |
| 2232.708                            | 2232.7070                           | X <sub>3/2</sub> | X <sub>3/2</sub> | 9      | 8       | 2.5  | 2.5   |
| 2233.209                            | 2233.2138                           | X <sub>1/2</sub> | X <sub>1/2</sub> | 2      | 1       | 40.5 | 40.5  |
| 2233.383                            | 2233.3803                           | X <sub>1/2</sub> | X <sub>1/2</sub> | 9      | 8       | 1.5  | 1.5   |
| 2238.938                            | 2238.9376                           | X <sub>1/2</sub> | X <sub>3/2</sub> | 10     | 9       | 6.5  | 6.5   |
| 2239.138                            | 2239.1421                           | X <sub>3/2</sub> | X <sub>1/2</sub> | 8      | 7       | 1.5  | 1.5   |
| 2244.569                            | 2244.5728                           | X <sub>3/2</sub> | X <sub>1/2</sub> | 5      | 4       | 15.5 | 15.5  |
| 2245.231                            | 2245.2302                           | X <sub>3/2</sub> | X <sub>3/2</sub> | 4      | 3       | 35.5 | 35.5  |
| 2255.009                            | 2255.0064                           | X <sub>3/2</sub> | X <sub>1/2</sub> | 3      | 2       | 37.5 | 36.5  |
| 2256.635                            | 2256.6336                           | X <sub>1/2</sub> | X <sub>3/2</sub> | 7      | 6       | 23.5 | 22.5  |
| 2268.556                            | 2268.5561                           | X <sub>1/2</sub> | X <sub>1/2</sub> | 3      | 2       | 37.5 | 37.5  |
| 2279.486                            | 2279.4883                           | X <sub>1/2</sub> | X <sub>1/2</sub> | 8      | 7       | 12.5 | 12.5  |
| 2283.543                            | 2283.5467                           | X <sub>1/2</sub> | X <sub>1/2</sub> | 1      | 0       | 26.5 | 25.5  |
| 2285.533                            | 2285.5353                           | X <sub>1/2</sub> | X <sub>1/2</sub> | 1      | 0       | 26.5 | 25.5  |
| 2286.062                            | 2286.0652                           | X <sub>1/2</sub> | X <sub>1/2</sub> | 6      | 5       | 24.5 | 24.5  |
| 2292.333                            | 2292.3276                           | X <sub>3/2</sub> | X <sub>3/2</sub> | 9      | 8       | 2.5  | 1.5   |
| 2300.178                            | 2300.1787                           | X <sub>3/2</sub> | X <sub>3/2</sub> | 3      | 2       | 22.5 | 21.5  |
| 2301.345                            | 2301.3493                           | X <sub>1/2</sub> | X <sub>1/2</sub> | 3      | 2       | 21.5 | 20.5  |
| 2304.614                            | 2304.6165                           | X <sub>3/2</sub> | X <sub>3/2</sub> | 7      | 6       | 19.5 | 19.5  |
| 2308.138                            | 2308.1370                           | X <sub>1/2</sub> | X <sub>1/2</sub> | 7      | 6       | 18.5 | 18.5  |
| 2308.420                            | 2308.4250                           | X <sub>3/2</sub> | X <sub>1/2</sub> | 1      | 0       | 16.5 | 15.5  |
| 2309.386                            | 2309.3909                           | X <sub>1/2</sub> | X <sub>3/2</sub> | 4      | 3       | 35.5 | 34.5  |
| 2310.184                            | 2310.1848                           | X <sub>1/2</sub> | X <sub>3/2</sub> | 1      | 0       | 45.5 | 44.5  |
| 2313.790                            | 2313.7878                           | X <sub>1/2</sub> | X <sub>1/2</sub> | 6      | 5       | 12.5 | 11.5  |
| 2314.760                            | 2314.7646                           | X <sub>3/2</sub> | X <sub>1/2</sub> | 8      | 7       | 7.5  | 6.5   |
| 2316.056                            | 2316.0614                           | X <sub>3/2</sub> | X <sub>1/2</sub> | 8      | 7       | 4.5  | 3.5   |
| 2318.716                            | 2318.7144                           | X <sub>1/2</sub> | X <sub>1/2</sub> | 4      | 3       | 18.5 | 17.5  |
| 2319.467                            | 2319.4705                           | X <sub>3/2</sub> | X <sub>1/2</sub> | 7      | 6       | 18.5 | 17.5  |
| 2319.603                            | 2319.5981                           | X <sub>1/2</sub> | X <sub>1/2</sub> | 3      | 2       | 36.5 | 36.5  |
| 2332.894                            | 2332.8894                           | X <sub>3/2</sub> | X <sub>3/2</sub> | 7      | 6       | 18.5 | 18.5  |
| 2338.193                            | 2338.1974                           | X <sub>1/2</sub> | X <sub>1/2</sub> | 8      | 7       | 3.5  | 2.5   |
| 2339.771                            | 2339.7726                           | X <sub>3/2</sub> | X <sub>1/2</sub> | 13     | 11      | 11.5 | 10.5  |
| 2345.979                            | 2345.9818                           | X <sub>1/2</sub> | X <sub>3/2</sub> | 9      | 8       | 3.5  | 2.5   |
| 2349.494                            | 2349.4948                           | X <sub>1/2</sub> | X <sub>3/2</sub> | 7      | 6       | 20.5 | 19.5  |
| 2358.180                            | 2358.1743                           | X <sub>1/2</sub> | X <sub>3/2</sub> | 2      | 1       | 41.5 | 40.5  |
| 2358.392                            | 2358.3866                           | X <sub>3/2</sub> | X <sub>1/2</sub> | 3      | 2       | 12.5 | 11.5  |
| 2367.179                            | 2367.1840                           | X <sub>3/2</sub> | X <sub>3/2</sub> | 5      | 4       | 15.5 | 14.5  |
| 2369.847                            | 2369.8492                           | X <sub>1/2</sub> | X <sub>1/2</sub> | 8      | 7       | 2.5  | 1.5   |
| 2375.319                            | 2375.3146                           | X <sub>3/2</sub> | X <sub>3/2</sub> | 9      | 8       | 7.5  | 6.5   |

Table S1 (continued)

| $v_{\text{exp}} \text{ (cm}^{-1}\text{)}$ | $v_{\text{the}} \text{ (cm}^{-1}\text{)}$ | GUQ              | GLQ              | $v'$ | $v''$ | $J'$ | $J''$ |
|-------------------------------------------|-------------------------------------------|------------------|------------------|------|-------|------|-------|
| 2378.676                                  | 2378.6780                                 | X <sub>1/2</sub> | X <sub>1/2</sub> | 2    | 1     | 22.5 | 21.5  |
| 2379.333                                  | 2379.3372                                 | X <sub>3/2</sub> | X <sub>3/2</sub> | 2    | 1     | 23.5 | 22.5  |
| 2380.327                                  | 2380.3277                                 | X <sub>1/2</sub> | X <sub>1/2</sub> | 2    | 1     | 22.5 | 21.5  |
| 2380.870                                  | 2380.8650                                 | X <sub>3/2</sub> | X <sub>1/2</sub> | 1    | 0     | 41.5 | 40.5  |
| 2384.806                                  | 2384.8071                                 | X <sub>3/2</sub> | X <sub>3/2</sub> | 7    | 6     | 16.5 | 16.5  |
| 2393.044                                  | 2393.0495                                 | X <sub>3/2</sub> | X <sub>3/2</sub> | 6    | 5     | 11.5 | 10.5  |
| 2394.156                                  | 2394.1582                                 | X <sub>1/2</sub> | X <sub>1/2</sub> | 9    | 8     | 8.5  | 7.5   |
| 2398.972                                  | 2398.9707                                 | X <sub>3/2</sub> | X <sub>3/2</sub> | 1    | 0     | 25.5 | 24.5  |
| 2399.886                                  | 2399.8871                                 | X <sub>1/2</sub> | X <sub>1/2</sub> | 1    | 0     | 40.5 | 40.5  |
| 2400.427                                  | 2400.4298                                 | X <sub>3/2</sub> | X <sub>1/2</sub> | 3    | 2     | 34.5 | 33.5  |
| 2402.911                                  | 2402.9088                                 | X <sub>3/2</sub> | X <sub>3/2</sub> | 3    | 2     | 20.5 | 19.5  |
| 2405.811                                  | 2405.8090                                 | X <sub>1/2</sub> | X <sub>3/2</sub> | 9    | 8     | 1.5  | 1.5   |
| 2406.090                                  | 2406.0919                                 | X <sub>1/2</sub> | X <sub>1/2</sub> | 3    | 2     | 19.5 | 18.5  |
| 2407.510                                  | 2407.5085                                 | X <sub>1/2</sub> | X <sub>1/2</sub> | 8    | 7     | 2.5  | 2.5   |
| 2412.344                                  | 2412.3496                                 | X <sub>1/2</sub> | X <sub>3/2</sub> | 10   | 9     | 7.5  | 6.5   |
| 2412.615                                  | 2412.6165                                 | X <sub>3/2</sub> | X <sub>3/2</sub> | 5    | 4     | 14.5 | 13.5  |
| 2413.603                                  | 2413.6056                                 | X <sub>1/2</sub> | X <sub>3/2</sub> | 10   | 9     | 7.5  | 6.5   |
| 2414.404                                  | 2414.4049                                 | X <sub>3/2</sub> | X <sub>1/2</sub> | 6    | 5     | 21.5 | 20.5  |
| 2415.228                                  | 2415.2299                                 | X <sub>3/2</sub> | X <sub>3/2</sub> | 4    | 3     | 17.5 | 16.5  |
| 2416.609                                  | 2416.6138                                 | X <sub>3/2</sub> | X <sub>3/2</sub> | 9    | 8     | 14.5 | 13.5  |
| 2416.859                                  | 2416.8567                                 | X <sub>1/2</sub> | X <sub>1/2</sub> | 5    | 4     | 13.5 | 12.5  |
| 2421.341                                  | 2421.3364                                 | X <sub>3/2</sub> | X <sub>3/2</sub> | 3    | 2     | 35.5 | 35.5  |
| 2423.558                                  | 2423.5583                                 | X <sub>1/2</sub> | X <sub>3/2</sub> | 9    | 8     | 17.5 | 17.5  |
| 2424.248                                  | 2424.2536                                 | X <sub>3/2</sub> | X <sub>1/2</sub> | 6    | 5     | 20.5 | 19.5  |
| 2431.692                                  | 2431.6935                                 | X <sub>3/2</sub> | X <sub>3/2</sub> | 2    | 1     | 22.5 | 21.5  |
| 2433.166                                  | 2433.1644                                 | X <sub>3/2</sub> | X <sub>1/2</sub> | 3    | 2     | 11.5 | 10.5  |
| 2433.664                                  | 2433.6618                                 | X <sub>3/2</sub> | X <sub>3/2</sub> | 2    | 1     | 22.5 | 21.5  |
| 2433.870                                  | 2433.8638                                 | X <sub>1/2</sub> | X <sub>1/2</sub> | 7    | 6     | 13.5 | 13.5  |
| 2434.759                                  | 2434.7554                                 | X <sub>1/2</sub> | X <sub>1/2</sub> | 2    | 1     | 21.5 | 20.5  |
| 2435.154                                  | 2435.1558                                 | X <sub>3/2</sub> | X <sub>1/2</sub> | 1    | 0     | 22.5 | 22.5  |
| 2452.333                                  | 2452.3357                                 | X <sub>1/2</sub> | X <sub>3/2</sub> | 8    | 7     | 7.5  | 6.5   |
| 2453.348                                  | 2453.3513                                 | X <sub>3/2</sub> | X <sub>3/2</sub> | 1    | 0     | 24.5 | 23.5  |
| 2454.287                                  | 2454.2851                                 | X <sub>3/2</sub> | X <sub>1/2</sub> | 6    | 5     | 6.5  | 6.5   |
| 2454.407                                  | 2454.4094                                 | X <sub>3/2</sub> | X <sub>3/2</sub> | 3    | 2     | 19.5 | 18.5  |
| 2454.602                                  | 2454.6040                                 | X <sub>3/2</sub> | X <sub>1/2</sub> | 7    | 6     | 1.5  | 0.5   |
| 2455.533                                  | 2455.5333                                 | X <sub>3/2</sub> | X <sub>3/2</sub> | 1    | 0     | 24.5 | 23.5  |
| 2456.074                                  | 2456.0785                                 | X <sub>3/2</sub> | X <sub>3/2</sub> | 3    | 2     | 19.5 | 18.5  |
| 2456.500                                  | 2456.4964                                 | X <sub>1/2</sub> | X <sub>1/2</sub> | 1    | 0     | 40.5 | 40.5  |
| 2457.190                                  | 2457.1880                                 | X <sub>3/2</sub> | X <sub>3/2</sub> | 7    | 6     | 5.5  | 4.5   |
| 2457.861                                  | 2457.8653                                 | X <sub>1/2</sub> | X <sub>3/2</sub> | 9    | 8     | 12.5 | 12.5  |
| 2460.001                                  | 2459.9981                                 | X <sub>1/2</sub> | X <sub>1/2</sub> | 7    | 6     | 12.5 | 12.5  |
| 2462.496                                  | 2462.4913                                 | X <sub>3/2</sub> | X <sub>3/2</sub> | 1    | 0     | 41.5 | 41.5  |
| 2470.981                                  | 2470.9841                                 | X <sub>3/2</sub> | X <sub>1/2</sub> | 2    | 1     | 36.5 | 35.5  |

Table S1 (continued)

| $v_{\text{exp}} \text{ (cm}^{-1}\text{)}$ | $v_{\text{the}} \text{ (cm}^{-1}\text{)}$ | GUQ              | GLQ              | $v'$ | $v''$ | $J'$ | $J''$ |
|-------------------------------------------|-------------------------------------------|------------------|------------------|------|-------|------|-------|
| 2473.382                                  | 2473.3816                                 | X <sub>3/2</sub> | X <sub>3/2</sub> | 8    | 7     | 2.5  | 1.5   |
| 2479.688                                  | 2479.6912                                 | X <sub>3/2</sub> | X <sub>1/2</sub> | 13   | 11    | 9.5  | 8.5   |
| 2481.945                                  | 2481.9499                                 | X <sub>1/2</sub> | X <sub>1/2</sub> | 5    | 4     | 24.5 | 24.5  |
| 2485.635                                  | 2485.6363                                 | X <sub>3/2</sub> | X <sub>3/2</sub> | 2    | 1     | 21.5 | 20.5  |
| 2486.743                                  | 2486.7414                                 | X <sub>3/2</sub> | X <sub>1/2</sub> | 4    | 3     | 29.5 | 28.5  |
| 2487.226                                  | 2487.2307                                 | X <sub>1/2</sub> | X <sub>1/2</sub> | 2    | 1     | 20.5 | 19.5  |
| 2487.524                                  | 2487.5245                                 | X <sub>3/2</sub> | X <sub>3/2</sub> | 2    | 1     | 21.5 | 20.5  |
| 2488.738                                  | 2488.7348                                 | X <sub>1/2</sub> | X <sub>1/2</sub> | 2    | 1     | 20.5 | 19.5  |
| 2490.977                                  | 2490.9744                                 | X <sub>1/2</sub> | X <sub>1/2</sub> | 2    | 1     | 36.5 | 36.5  |
| 2500.841                                  | 2500.8355                                 | X <sub>3/2</sub> | X <sub>3/2</sub> | 5    | 4     | 12.5 | 11.5  |
| 2505.305                                  | 2505.3086                                 | X <sub>3/2</sub> | X <sub>3/2</sub> | 3    | 2     | 18.5 | 17.5  |
| 2505.456                                  | 2505.4605                                 | X <sub>1/2</sub> | X <sub>3/2</sub> | 5    | 4     | 26.5 | 25.5  |
| 2506.890                                  | 2506.8912                                 | X <sub>3/2</sub> | X <sub>3/2</sub> | 3    | 2     | 18.5 | 17.5  |
| 2508.656                                  | 2508.6584                                 | X <sub>1/2</sub> | X <sub>1/2</sub> | 3    | 2     | 17.5 | 16.5  |
| 2510.949                                  | 2510.9502                                 | X <sub>1/2</sub> | X <sub>1/2</sub> | 1    | 0     | 22.5 | 21.5  |
| 2511.732                                  | 2511.7334                                 | X <sub>3/2</sub> | X <sub>3/2</sub> | 1    | 0     | 23.5 | 22.5  |
| 2512.209                                  | 2512.2138                                 | X <sub>3/2</sub> | X <sub>3/2</sub> | 4    | 3     | 15.5 | 14.5  |
| 2512.663                                  | 2512.6651                                 | X <sub>1/2</sub> | X <sub>1/2</sub> | 1    | 0     | 22.5 | 21.5  |
| 2514.184                                  | 2514.1848                                 | X <sub>3/2</sub> | X <sub>3/2</sub> | 8    | 7     | 4.5  | 3.5   |
| 2514.840                                  | 2514.8380                                 | X <sub>1/2</sub> | X <sub>1/2</sub> | 4    | 3     | 14.5 | 13.5  |
| 2524.246                                  | 2524.2509                                 | X <sub>3/2</sub> | X <sub>1/2</sub> | 2    | 1     | 36.5 | 35.5  |
| 2532.667                                  | 2532.6680                                 | X <sub>3/2</sub> | X <sub>3/2</sub> | 8    | 7     | 5.5  | 4.5   |
| 2536.945                                  | 2536.9448                                 | X <sub>1/2</sub> | X <sub>3/2</sub> | 10   | 9     | 13.5 | 12.5  |
| 2537.138                                  | 2537.1362                                 | X <sub>3/2</sub> | X <sub>1/2</sub> | 6    | 5     | 3.5  | 3.5   |
| 2538.344                                  | 2538.3461                                 | X <sub>3/2</sub> | X <sub>1/2</sub> | 6    | 5     | 16.5 | 15.5  |
| 2539.080                                  | 2539.0806                                 | X <sub>3/2</sub> | X <sub>3/2</sub> | 2    | 1     | 20.5 | 19.5  |
| 2540.801                                  | 2540.8019                                 | X <sub>1/2</sub> | X <sub>1/2</sub> | 2    | 1     | 19.5 | 18.5  |
| 2540.882                                  | 2540.8862                                 | X <sub>3/2</sub> | X <sub>3/2</sub> | 2    | 1     | 20.5 | 19.5  |
| 2542.233                                  | 2542.2291                                 | X <sub>1/2</sub> | X <sub>1/2</sub> | 2    | 1     | 19.5 | 18.5  |
| 2545.740                                  | 2545.7442                                 | X <sub>3/2</sub> | X <sub>1/2</sub> | 5    | 4     | 5.5  | 4.5   |
| 2545.817                                  | 2545.8228                                 | X <sub>3/2</sub> | X <sub>3/2</sub> | 4    | 3     | 27.5 | 27.5  |
| 2546.874                                  | 2546.8766                                 | X <sub>3/2</sub> | X <sub>3/2</sub> | 6    | 5     | 17.5 | 17.5  |
| 2550.359                                  | 2550.3599                                 | X <sub>1/2</sub> | X <sub>1/2</sub> | 3    | 2     | 31.5 | 31.5  |
| 2551.110                                  | 2551.1114                                 | X <sub>1/2</sub> | X <sub>3/2</sub> | 7    | 6     | 11.5 | 10.5  |
| 2552.471                                  | 2552.4720                                 | X <sub>1/2</sub> | X <sub>1/2</sub> | 13   | 11    | 11.5 | 10.5  |
| 2555.564                                  | 2555.5650                                 | X <sub>3/2</sub> | X <sub>3/2</sub> | 3    | 2     | 17.5 | 16.5  |
| 2556.656                                  | 2556.6539                                 | X <sub>3/2</sub> | X <sub>3/2</sub> | 7    | 6     | 6.5  | 6.5   |
| 2557.892                                  | 2557.8937                                 | X <sub>1/2</sub> | X <sub>1/2</sub> | 3    | 2     | 16.5 | 15.5  |
| 2558.811                                  | 2558.8115                                 | X <sub>3/2</sub> | X <sub>3/2</sub> | 4    | 3     | 14.5 | 13.5  |
| 2559.035                                  | 2559.0365                                 | X <sub>1/2</sub> | X <sub>1/2</sub> | 3    | 2     | 16.5 | 15.5  |
| 2560.933                                  | 2560.9321                                 | X <sub>1/2</sub> | X <sub>1/2</sub> | 4    | 3     | 13.5 | 12.5  |
| 2563.325                                  | 2563.3282                                 | X <sub>3/2</sub> | X <sub>3/2</sub> | 7    | 6     | 5.5  | 5.5   |
| 2565.504                                  | 2565.5049                                 | X <sub>3/2</sub> | X <sub>3/2</sub> | 1    | 0     | 22.5 | 21.5  |

Table S1 (continued)

| $\nu_{\text{exp}} (\text{cm}^{-1})$ | $\nu_{\text{the}} (\text{cm}^{-1})$ | GUQ              | GLQ              | $\nu'$ | $\nu''$ | $J'$ | $J''$ |
|-------------------------------------|-------------------------------------|------------------|------------------|--------|---------|------|-------|
| 2566.918                            | 2566.9233                           | X <sub>1/2</sub> | X <sub>1/2</sub> | 1      | 0       | 21.5 | 20.5  |
| 2567.528                            | 2567.5317                           | X <sub>3/2</sub> | X <sub>1/2</sub> | 6      | 5       | 14.5 | 13.5  |
| 2568.462                            | 2568.4643                           | X <sub>1/2</sub> | X <sub>3/2</sub> | 4      | 3       | 28.5 | 27.5  |
| 2568.561                            | 2568.5635                           | X <sub>1/2</sub> | X <sub>1/2</sub> | 1      | 0       | 21.5 | 20.5  |
| 2569.119                            | 2569.1241                           | X <sub>3/2</sub> | X <sub>1/2</sub> | 4      | 3       | 11.5 | 11.5  |
| 2576.564                            | 2576.5599                           | X <sub>3/2</sub> | X <sub>1/2</sub> | 5      | 4       | 7.5  | 7.5   |
| 2578.544                            | 2578.5451                           | X <sub>1/2</sub> | X <sub>3/2</sub> | 1      | 0       | 40.5 | 39.5  |
| 2579.098                            | 2579.0949                           | X <sub>3/2</sub> | X <sub>3/2</sub> | 8      | 7       | 8.5  | 7.5   |
| 2581.389                            | 2581.3837                           | X <sub>3/2</sub> | X <sub>3/2</sub> | 7      | 6       | 2.5  | 2.5   |
| 2582.162                            | 2582.1653                           | X <sub>1/2</sub> | X <sub>1/2</sub> | 7      | 6       | 1.5  | 1.5   |
| 2584.366                            | 2584.3708                           | X <sub>3/2</sub> | X <sub>3/2</sub> | 7      | 6       | 1.5  | 1.5   |
| 2585.191                            | 2585.1945                           | X <sub>3/2</sub> | X <sub>3/2</sub> | 5      | 4       | 10.5 | 9.5   |
| 2587.241                            | 2587.2431                           | X <sub>1/2</sub> | X <sub>3/2</sub> | 6      | 5       | 17.5 | 16.5  |
| 2591.877                            | 2591.8805                           | X <sub>1/2</sub> | X <sub>3/2</sub> | 8      | 7       | 2.5  | 2.5   |
| 2591.986                            | 2591.9852                           | X <sub>3/2</sub> | X <sub>3/2</sub> | 2      | 1       | 19.5 | 18.5  |
| 2593.706                            | 2593.7059                           | X <sub>3/2</sub> | X <sub>3/2</sub> | 2      | 1       | 19.5 | 18.5  |
| 2593.848                            | 2593.8526                           | X <sub>1/2</sub> | X <sub>1/2</sub> | 2      | 1       | 18.5 | 17.5  |
| 2595.205                            | 2595.2009                           | X <sub>1/2</sub> | X <sub>1/2</sub> | 2      | 1       | 18.5 | 17.5  |
| 2599.016                            | 2599.0163                           | X <sub>1/2</sub> | X <sub>1/2</sub> | 8      | 7       | 9.5  | 8.5   |
| 2602.024                            | 2602.0221                           | X <sub>3/2</sub> | X <sub>3/2</sub> | 8      | 7       | 19.5 | 18.5  |
| 2603.687                            | 2603.6900                           | X <sub>1/2</sub> | X <sub>3/2</sub> | 5      | 4       | 23.5 | 22.5  |
| 2604.566                            | 2604.5657                           | X <sub>3/2</sub> | X <sub>3/2</sub> | 4      | 3       | 13.5 | 12.5  |
| 2605.132                            | 2605.1351                           | X <sub>3/2</sub> | X <sub>3/2</sub> | 3      | 2       | 16.5 | 15.5  |
| 2606.535                            | 2606.5399                           | X <sub>3/2</sub> | X <sub>3/2</sub> | 3      | 2       | 16.5 | 15.5  |
| 2607.700                            | 2607.7009                           | X <sub>1/2</sub> | X <sub>1/2</sub> | 3      | 2       | 15.5 | 14.5  |
| 2608.757                            | 2608.7622                           | X <sub>1/2</sub> | X <sub>1/2</sub> | 3      | 2       | 15.5 | 14.5  |
| 2609.785                            | 2609.7795                           | X <sub>3/2</sub> | X <sub>1/2</sub> | 13     | 11      | 8.5  | 8.5   |
| 2611.977                            | 2611.9805                           | X <sub>1/2</sub> | X <sub>3/2</sub> | 3      | 2       | 31.5 | 30.5  |
| 2614.565                            | 2614.5637                           | X <sub>3/2</sub> | X <sub>3/2</sub> | 1      | 0       | 38.5 | 38.5  |
| 2616.422                            | 2616.4201                           | X <sub>3/2</sub> | X <sub>3/2</sub> | 8      | 7       | 12.5 | 11.5  |
| 2617.803                            | 2617.8090                           | X <sub>3/2</sub> | X <sub>3/2</sub> | 8      | 7       | 17.5 | 16.5  |
| 2619.893                            | 2619.8889                           | X <sub>3/2</sub> | X <sub>3/2</sub> | 6      | 5       | 13.5 | 13.5  |
| 2620.942                            | 2620.9427                           | X <sub>3/2</sub> | X <sub>3/2</sub> | 1      | 0       | 21.5 | 20.5  |
| 2621.369                            | 2621.3710                           | X <sub>1/2</sub> | X <sub>1/2</sub> | 8      | 7       | 15.5 | 14.5  |
| 2621.876                            | 2621.8732                           | X <sub>3/2</sub> | X <sub>3/2</sub> | 8      | 7       | 16.5 | 15.5  |
| 2622.469                            | 2622.4699                           | X <sub>1/2</sub> | X <sub>1/2</sub> | 1      | 0       | 20.5 | 19.5  |
| 2622.888                            | 2622.8886                           | X <sub>3/2</sub> | X <sub>3/2</sub> | 1      | 0       | 21.5 | 20.5  |
| 2623.087                            | 2623.0915                           | X <sub>3/2</sub> | X <sub>1/2</sub> | 3      | 2       | 13.5 | 13.5  |
| 2623.807                            | 2623.8074                           | X <sub>3/2</sub> | X <sub>3/2</sub> | 8      | 7       | 15.5 | 14.5  |
| 2624.032                            | 2624.0331                           | X <sub>1/2</sub> | X <sub>1/2</sub> | 1      | 0       | 20.5 | 19.5  |
| 2630.277                            | 2630.2726                           | X <sub>3/2</sub> | X <sub>3/2</sub> | 6      | 5       | 13.5 | 13.5  |
| 2631.752                            | 2631.7467                           | X <sub>1/2</sub> | X <sub>1/2</sub> | 6      | 5       | 4.5  | 3.5   |
| 2632.517                            | 2632.5202                           | X <sub>1/2</sub> | X <sub>1/2</sub> | 5      | 4       | 8.5  | 7.5   |



Table S1 (continued)

| $v_{\text{exp}} (\text{cm}^{-1})$ | $v_{\text{the}} (\text{cm}^{-1})$ | GUQ              | GLQ              | $v'$ | $v''$ | $J'$ | $J''$ |
|-----------------------------------|-----------------------------------|------------------|------------------|------|-------|------|-------|
| 2642.780                          | 2642.7822                         | X <sub>1/2</sub> | X <sub>3/2</sub> | 8    | 7     | 17.5 | 17.5  |
| 2642.901                          | 2642.8993                         | X <sub>1/2</sub> | X <sub>3/2</sub> | 8    | 7     | 8.5  | 8.5   |
| 2644.306                          | 2644.3074                         | X <sub>3/2</sub> | X <sub>3/2</sub> | 2    | 1     | 18.5 | 17.5  |
| 2645.939                          | 2645.9410                         | X <sub>3/2</sub> | X <sub>3/2</sub> | 2    | 1     | 18.5 | 17.5  |
| 2646.343                          | 2646.3441                         | X <sub>1/2</sub> | X <sub>1/2</sub> | 2    | 1     | 17.5 | 16.5  |
| 2647.616                          | 2647.6113                         | X <sub>1/2</sub> | X <sub>1/2</sub> | 2    | 1     | 17.5 | 16.5  |
| 2647.732                          | 2647.7335                         | X <sub>1/2</sub> | X <sub>1/2</sub> | 5    | 4     | 18.5 | 18.5  |
| 2648.429                          | 2648.4323                         | X <sub>3/2</sub> | X <sub>3/2</sub> | 4    | 3     | 12.5 | 11.5  |
| 2649.430                          | 2649.4261                         | X <sub>3/2</sub> | X <sub>3/2</sub> | 4    | 3     | 12.5 | 11.5  |
| 2650.388                          | 2650.3821                         | X <sub>3/2</sub> | X <sub>3/2</sub> | 6    | 5     | 4.5  | 3.5   |
| 2653.976                          | 2653.9735                         | X <sub>3/2</sub> | X <sub>3/2</sub> | 3    | 2     | 15.5 | 14.5  |
| 2654.691                          | 2654.6934                         | X <sub>1/2</sub> | X <sub>3/2</sub> | 8    | 7     | 10.5 | 10.5  |
| 2655.290                          | 2655.2874                         | X <sub>3/2</sub> | X <sub>3/2</sub> | 3    | 2     | 15.5 | 14.5  |
| 2655.589                          | 2655.5834                         | X <sub>1/2</sub> | X <sub>1/2</sub> | 7    | 6     | 2.5  | 1.5   |
| 2656.821                          | 2656.8205                         | X <sub>1/2</sub> | X <sub>1/2</sub> | 3    | 2     | 14.5 | 13.5  |
| 2657.797                          | 2657.7987                         | X <sub>1/2</sub> | X <sub>1/2</sub> | 3    | 2     | 14.5 | 13.5  |
| 2659.354                          | 2659.3532                         | X <sub>3/2</sub> | X <sub>1/2</sub> | 6    | 5     | 5.5  | 4.5   |
| 2665.229                          | 2665.2234                         | X <sub>3/2</sub> | X <sub>3/2</sub> | 5    | 4     | 8.5  | 7.5   |
| 2665.334                          | 2665.3318                         | X <sub>1/2</sub> | X <sub>3/2</sub> | 1    | 0     | 37.5 | 36.5  |
| 2665.812                          | 2665.8061                         | X <sub>3/2</sub> | X <sub>3/2</sub> | 5    | 4     | 8.5  | 7.5   |
| 2675.901                          | 2675.8986                         | X <sub>3/2</sub> | X <sub>3/2</sub> | 1    | 0     | 20.5 | 19.5  |
| 2677.551                          | 2677.5501                         | X <sub>1/2</sub> | X <sub>1/2</sub> | 1    | 0     | 19.5 | 18.5  |
| 2677.756                          | 2677.7607                         | X <sub>3/2</sub> | X <sub>3/2</sub> | 1    | 0     | 20.5 | 19.5  |
| 2679.031                          | 2679.0341                         | X <sub>1/2</sub> | X <sub>1/2</sub> | 1    | 0     | 19.5 | 18.5  |
| 2686.409                          | 2686.4040                         | X <sub>3/2</sub> | X <sub>3/2</sub> | 6    | 5     | 9.5  | 9.5   |
| 2688.175                          | 2688.1759                         | X <sub>1/2</sub> | X <sub>3/2</sub> | 8    | 7     | 3.5  | 2.5   |
| 2690.776                          | 2690.7744                         | X <sub>3/2</sub> | X <sub>1/2</sub> | 4    | 3     | 8.5  | 8.5   |
| 2691.102                          | 2691.0958                         | X <sub>3/2</sub> | X <sub>3/2</sub> | 7    | 6     | 4.5  | 3.5   |
| 2693.337                          | 2693.3388                         | X <sub>3/2</sub> | X <sub>3/2</sub> | 4    | 3     | 11.5 | 10.5  |
| 2696.001                          | 2696.0026                         | X <sub>3/2</sub> | X <sub>3/2</sub> | 2    | 1     | 17.5 | 16.5  |
| 2696.304                          | 2696.3045                         | X <sub>3/2</sub> | X <sub>1/2</sub> | 5    | 4     | 3.5  | 3.5   |
| 2697.274                          | 2697.2765                         | X <sub>1/2</sub> | X <sub>1/2</sub> | 4    | 3     | 10.5 | 9.5   |
| 2697.543                          | 2697.5472                         | X <sub>3/2</sub> | X <sub>3/2</sub> | 2    | 1     | 17.5 | 16.5  |
| 2698.236                          | 2698.2371                         | X <sub>1/2</sub> | X <sub>1/2</sub> | 2    | 1     | 16.5 | 15.5  |
| 2698.346                          | 2698.3498                         | X <sub>1/2</sub> | X <sub>3/2</sub> | 6    | 5     | 12.5 | 11.5  |
| 2699.425                          | 2699.4212                         | X <sub>1/2</sub> | X <sub>1/2</sub> | 2    | 1     | 16.5 | 15.5  |
| 2702.038                          | 2702.0327                         | X <sub>3/2</sub> | X <sub>3/2</sub> | 3    | 2     | 14.5 | 13.5  |
| 2702.877                          | 2702.8766                         | X <sub>1/2</sub> | X <sub>1/2</sub> | 7    | 6     | 4.5  | 3.5   |
| 2703.257                          | 2703.2545                         | X <sub>3/2</sub> | X <sub>3/2</sub> | 3    | 2     | 14.5 | 13.5  |
| 2703.437                          | 2703.4349                         | X <sub>3/2</sub> | X <sub>3/2</sub> | 5    | 4     | 7.5  | 6.5   |
| 2703.921                          | 2703.9222                         | X <sub>3/2</sub> | X <sub>3/2</sub> | 5    | 4     | 7.5  | 6.5   |
| 2703.999                          | 2703.9937                         | X <sub>3/2</sub> | X <sub>1/2</sub> | 1    | 0     | 11.5 | 10.5  |
| 2705.215                          | 2705.2161                         | X <sub>1/2</sub> | X <sub>1/2</sub> | 3    | 2     | 13.5 | 12.5  |

Table S1 (continued)

| $\nu_{\text{exp}} (\text{cm}^{-1})$ | $\nu_{\text{the}} (\text{cm}^{-1})$ | GUQ              | GLQ              | $\nu'$ | $\nu''$ | $J'$ | $J''$ |
|-------------------------------------|-------------------------------------|------------------|------------------|--------|---------|------|-------|
| 2706.106                            | 2706.1100                           | X <sub>1/2</sub> | X <sub>1/2</sub> | 3      | 2       | 13.5 | 12.5  |
| 2711.024                            | 2711.0281                           | X <sub>3/2</sub> | X <sub>3/2</sub> | 6      | 5       | 7.5  | 7.5   |
| 2711.534                            | 2711.5377                           | X <sub>1/2</sub> | X <sub>3/2</sub> | 4      | 3       | 24.5 | 23.5  |
| 2714.011                            | 2714.0154                           | X <sub>3/2</sub> | X <sub>3/2</sub> | 5      | 4       | 17.5 | 17.5  |
| 2714.190                            | 2714.1866                           | X <sub>1/2</sub> | X <sub>1/2</sub> | 4      | 3       | 22.5 | 22.5  |
| 2722.482                            | 2722.4793                           | X <sub>1/2</sub> | X <sub>3/2</sub> | 8      | 7       | 4.5  | 3.5   |
| 2723.361                            | 2723.3661                           | X <sub>1/2</sub> | X <sub>1/2</sub> | 7      | 6       | 5.5  | 4.5   |
| 2723.558                            | 2723.5546                           | X <sub>3/2</sub> | X <sub>3/2</sub> | 6      | 5       | 6.5  | 6.5   |
| 2727.582                            | 2727.5860                           | X <sub>3/2</sub> | X <sub>1/2</sub> | 3      | 2       | 27.5 | 26.5  |
| 2730.332                            | 2730.3288                           | X <sub>3/2</sub> | X <sub>3/2</sub> | 1      | 0       | 19.5 | 18.5  |
| 2733.523                            | 2733.5259                           | X <sub>1/2</sub> | X <sub>1/2</sub> | 1      | 0       | 18.5 | 17.5  |
| 2740.326                            | 2740.3293                           | X <sub>3/2</sub> | X <sub>3/2</sub> | 5      | 4       | 6.5  | 5.5   |
| 2740.717                            | 2740.7199                           | X <sub>3/2</sub> | X <sub>3/2</sub> | 5      | 4       | 6.5  | 5.5   |
| 2741.057                            | 2741.0520                           | X <sub>1/2</sub> | X <sub>1/2</sub> | 4      | 3       | 9.5  | 8.5   |
| 2741.567                            | 2741.5627                           | X <sub>1/2</sub> | X <sub>1/2</sub> | 4      | 3       | 9.5  | 8.5   |
| 2746.692                            | 2746.6946                           | X <sub>1/2</sub> | X <sub>1/2</sub> | 5      | 4       | 14.5 | 14.5  |
| 2747.019                            | 2747.0247                           | X <sub>3/2</sub> | X <sub>3/2</sub> | 2      | 1       | 16.5 | 15.5  |
| 2747.423                            | 2747.4238                           | X <sub>3/2</sub> | X <sub>3/2</sub> | 6      | 5       | 2.5  | 2.5   |
| 2748.475                            | 2748.4785                           | X <sub>3/2</sub> | X <sub>3/2</sub> | 2      | 1       | 16.5 | 15.5  |
| 2749.267                            | 2749.2629                           | X <sub>3/2</sub> | X <sub>3/2</sub> | 3      | 2       | 13.5 | 12.5  |
| 2749.388                            | 2749.3841                           | X <sub>3/2</sub> | X <sub>1/2</sub> | 13     | 11      | 4.5  | 3.5   |
| 2749.494                            | 2749.4918                           | X <sub>1/2</sub> | X <sub>1/2</sub> | 2      | 1       | 15.5 | 14.5  |
| 2750.393                            | 2750.3913                           | X <sub>3/2</sub> | X <sub>3/2</sub> | 3      | 2       | 13.5 | 12.5  |
| 2750.592                            | 2750.5912                           | X <sub>1/2</sub> | X <sub>1/2</sub> | 2      | 1       | 15.5 | 14.5  |
| 2750.703                            | 2750.7009                           | X <sub>1/2</sub> | X <sub>1/2</sub> | 3      | 2       | 25.5 | 25.5  |
| 2751.908                            | 2751.9069                           | X <sub>1/2</sub> | X <sub>1/2</sub> | 5      | 4       | 5.5  | 4.5   |
| 2752.855                            | 2752.8527                           | X <sub>1/2</sub> | X <sub>1/2</sub> | 3      | 2       | 12.5 | 11.5  |
| 2753.661                            | 2753.6611                           | X <sub>1/2</sub> | X <sub>1/2</sub> | 3      | 2       | 12.5 | 11.5  |
| 2754.870                            | 2754.8674                           | X <sub>3/2</sub> | X <sub>3/2</sub> | 1      | 0       | 35.5 | 35.5  |
| 2758.355                            | 2758.3594                           | X <sub>3/2</sub> | X <sub>1/2</sub> | 3      | 2       | 10.5 | 10.5  |
| 2758.610                            | 2758.6150                           | X <sub>1/2</sub> | X <sub>3/2</sub> | 7      | 6       | 1.5  | 1.5   |
| 2764.266                            | 2764.2669                           | X <sub>3/2</sub> | X <sub>3/2</sub> | 13     | 11      | 10.5 | 10.5  |
| 2765.008                            | 2765.0129                           | X <sub>3/2</sub> | X <sub>3/2</sub> | 7      | 6       | 23.5 | 22.5  |
| 2767.952                            | 2767.9491                           | X <sub>1/2</sub> | X <sub>1/2</sub> | 13     | 11      | 9.5  | 9.5   |
| 2769.375                            | 2769.3715                           | X <sub>3/2</sub> | X <sub>1/2</sub> | 1      | 0       | 33.5 | 32.5  |
| 2775.803                            | 2775.8081                           | X <sub>3/2</sub> | X <sub>3/2</sub> | 5      | 4       | 5.5  | 4.5   |
| 2776.106                            | 2776.1014                           | X <sub>3/2</sub> | X <sub>3/2</sub> | 5      | 4       | 5.5  | 4.5   |
| 2776.291                            | 2776.2959                           | X <sub>3/2</sub> | X <sub>1/2</sub> | 13     | 11      | 4.5  | 4.5   |
| 2778.075                            | 2778.0804                           | X <sub>3/2</sub> | X <sub>3/2</sub> | 4      | 3       | 9.5  | 8.5   |
| 2778.970                            | 2778.9744                           | X <sub>3/2</sub> | X <sub>3/2</sub> | 4      | 3       | 20.5 | 20.5  |
| 2783.957                            | 2783.9606                           | X <sub>1/2</sub> | X <sub>1/2</sub> | 4      | 3       | 8.5  | 7.5   |
| 2784.187                            | 2784.1878                           | X <sub>3/2</sub> | X <sub>3/2</sub> | 1      | 0       | 18.5 | 17.5  |
| 2784.381                            | 2784.3826                           | X <sub>1/2</sub> | X <sub>1/2</sub> | 4      | 3       | 8.5  | 7.5   |

Table S1 (continued)

| $\nu_{\text{exp}} (\text{cm}^{-1})$ | $\nu_{\text{the}} (\text{cm}^{-1})$ | GUQ              | GLQ              | $\nu'$ | $\nu''$ | $J'$ | $J''$ |
|-------------------------------------|-------------------------------------|------------------|------------------|--------|---------|------|-------|
| 2785.212                            | 2785.2163                           | X <sub>3/2</sub> | X <sub>1/2</sub> | 3      | 2       | 6.5  | 5.5   |
| 2785.876                            | 2785.8752                           | X <sub>3/2</sub> | X <sub>3/2</sub> | 1      | 0       | 18.5 | 17.5  |
| 2786.149                            | 2786.1478                           | X <sub>1/2</sub> | X <sub>1/2</sub> | 1      | 0       | 17.5 | 16.5  |
| 2787.466                            | 2787.4671                           | X <sub>1/2</sub> | X <sub>1/2</sub> | 1      | 0       | 17.5 | 16.5  |
| 2792.669                            | 2792.6658                           | X <sub>1/2</sub> | X <sub>3/2</sub> | 8      | 7       | 6.5  | 5.5   |
| 2793.320                            | 2793.3209                           | X <sub>1/2</sub> | X <sub>1/2</sub> | 7      | 6       | 20.5 | 19.5  |
| 2795.613                            | 2795.6111                           | X <sub>3/2</sub> | X <sub>3/2</sub> | 3      | 2       | 12.5 | 11.5  |
| 2796.232                            | 2796.2372                           | X <sub>1/2</sub> | X <sub>3/2</sub> | 9      | 8       | 14.5 | 13.5  |
| 2796.647                            | 2796.6451                           | X <sub>3/2</sub> | X <sub>3/2</sub> | 3      | 2       | 12.5 | 11.5  |
| 2797.321                            | 2797.3258                           | X <sub>3/2</sub> | X <sub>3/2</sub> | 2      | 1       | 15.5 | 14.5  |
| 2798.685                            | 2798.6871                           | X <sub>3/2</sub> | X <sub>3/2</sub> | 2      | 1       | 15.5 | 14.5  |
| 2799.081                            | 2799.0789                           | X <sub>1/2</sub> | X <sub>3/2</sub> | 5      | 4       | 15.5 | 14.5  |
| 2799.699                            | 2799.6977                           | X <sub>1/2</sub> | X <sub>1/2</sub> | 3      | 2       | 11.5 | 10.5  |
| 2800.064                            | 2800.0688                           | X <sub>1/2</sub> | X <sub>1/2</sub> | 2      | 1       | 14.5 | 13.5  |
| 2800.420                            | 2800.4192                           | X <sub>1/2</sub> | X <sub>1/2</sub> | 3      | 2       | 11.5 | 10.5  |
| 2801.083                            | 2801.0820                           | X <sub>1/2</sub> | X <sub>1/2</sub> | 2      | 1       | 14.5 | 13.5  |
| 2803.712                            | 2803.7056                           | X <sub>3/2</sub> | X <sub>3/2</sub> | 7      | 6       | 20.5 | 19.5  |
| 2804.316                            | 2804.3137                           | X <sub>3/2</sub> | X <sub>1/2</sub> | 13     | 11      | 3.5  | 3.5   |
| 2806.840                            | 2806.8432                           | X <sub>1/2</sub> | X <sub>1/2</sub> | 7      | 6       | 11.5 | 10.5  |
| 2807.115                            | 2807.1153                           | X <sub>1/2</sub> | X <sub>3/2</sub> | 7      | 6       | 6.5  | 6.5   |
| 2809.282                            | 2809.2880                           | X <sub>3/2</sub> | X <sub>1/2</sub> | 4      | 3       | 18.5 | 17.5  |
| 2809.455                            | 2809.4578                           | X <sub>1/2</sub> | X <sub>3/2</sub> | 5      | 4       | 15.5 | 14.5  |
| 2811.884                            | 2811.8842                           | X <sub>1/2</sub> | X <sub>1/2</sub> | 7      | 6       | 18.5 | 17.5  |
| 2812.793                            | 2812.7874                           | X <sub>3/2</sub> | X <sub>1/2</sub> | 1      | 0       | 15.5 | 15.5  |
| 2814.074                            | 2814.0775                           | X <sub>1/2</sub> | X <sub>1/2</sub> | 3      | 1       | 46.5 | 45.5  |
| 2814.150                            | 2814.1500                           | X <sub>1/2</sub> | X <sub>1/2</sub> | 3      | 2       | 24.5 | 24.5  |
| 2814.809                            | 2814.8130                           | X <sub>3/2</sub> | X <sub>3/2</sub> | 7      | 6       | 13.5 | 12.5  |
| 2814.921                            | 2814.9259                           | X <sub>3/2</sub> | X <sub>1/2</sub> | 2      | 1       | 12.5 | 12.5  |
| 2816.198                            | 2816.2029                           | X <sub>3/2</sub> | X <sub>3/2</sub> | 13     | 11      | 7.5  | 6.5   |
| 2816.501                            | 2816.5064                           | X <sub>1/2</sub> | X <sub>3/2</sub> | 7      | 6       | 7.5  | 7.5   |
| 2818.158                            | 2818.1570                           | X <sub>3/2</sub> | X <sub>3/2</sub> | 4      | 3       | 8.5  | 7.5   |
| 2818.646                            | 2818.6419                           | X <sub>1/2</sub> | X <sub>1/2</sub> | 7      | 6       | 13.5 | 12.5  |
| 2818.771                            | 2818.7715                           | X <sub>3/2</sub> | X <sub>3/2</sub> | 4      | 3       | 8.5  | 7.5   |
| 2819.600                            | 2819.6014                           | X <sub>3/2</sub> | X <sub>3/2</sub> | 7      | 6       | 14.5 | 13.5  |
| 2820.314                            | 2820.3107                           | X <sub>1/2</sub> | X <sub>3/2</sub> | 6      | 5       | 5.5  | 4.5   |
| 2821.167                            | 2821.1632                           | X <sub>1/2</sub> | X <sub>1/2</sub> | 7      | 6       | 16.5 | 15.5  |
| 2825.995                            | 2825.9971                           | X <sub>1/2</sub> | X <sub>1/2</sub> | 4      | 3       | 7.5  | 6.5   |
| 2826.478                            | 2826.4731                           | X <sub>3/2</sub> | X <sub>1/2</sub> | 13     | 11      | 2.5  | 2.5   |
| 2827.096                            | 2827.0986                           | X <sub>1/2</sub> | X <sub>1/2</sub> | 5      | 4       | 3.5  | 2.5   |
| 2829.378                            | 2829.3777                           | X <sub>3/2</sub> | X <sub>1/2</sub> | 3      | 2       | 23.5 | 22.5  |
| 2837.428                            | 2837.4287                           | X <sub>3/2</sub> | X <sub>3/2</sub> | 1      | 0       | 17.5 | 16.5  |
| 2838.076                            | 2838.0783                           | X <sub>1/2</sub> | X <sub>3/2</sub> | 6      | 5       | 4.5  | 3.5   |
| 2839.024                            | 2839.0254                           | X <sub>3/2</sub> | X <sub>3/2</sub> | 1      | 0       | 17.5 | 16.5  |

Table S1 (continued)

| $v_{\text{exp}} (\text{cm}^{-1})$ | $v_{\text{the}} (\text{cm}^{-1})$ | GUQ              | GLQ              | $v'$ | $v''$ | $J'$ | $J''$ |
|-----------------------------------|-----------------------------------|------------------|------------------|------|-------|------|-------|
| 2839.585                          | 2839.5819                         | X <sub>1/2</sub> | X <sub>1/2</sub> | 1    | 0     | 16.5 | 15.5  |
| 2840.818                          | 2840.8160                         | X <sub>1/2</sub> | X <sub>1/2</sub> | 1    | 0     | 16.5 | 15.5  |
| 2841.023                          | 2841.0210                         | X <sub>3/2</sub> | X <sub>3/2</sub> | 3    | 2     | 11.5 | 10.5  |
| 2841.964                          | 2841.9596                         | X <sub>3/2</sub> | X <sub>3/2</sub> | 3    | 2     | 11.5 | 10.5  |
| 2842.227                          | 2842.2214                         | X <sub>3/2</sub> | X <sub>3/2</sub> | 1    | 0     | 33.5 | 33.5  |
| 2845.720                          | 2845.7220                         | X <sub>1/2</sub> | X <sub>1/2</sub> | 3    | 2     | 10.5 | 9.5   |
| 2846.851                          | 2846.8558                         | X <sub>3/2</sub> | X <sub>3/2</sub> | 2    | 1     | 14.5 | 13.5  |
| 2848.122                          | 2848.1232                         | X <sub>3/2</sub> | X <sub>3/2</sub> | 2    | 1     | 14.5 | 13.5  |
| 2849.931                          | 2849.9294                         | X <sub>1/2</sub> | X <sub>1/2</sub> | 2    | 1     | 13.5 | 12.5  |
| 2850.860                          | 2850.8551                         | X <sub>1/2</sub> | X <sub>1/2</sub> | 2    | 1     | 13.5 | 12.5  |
| 2851.638                          | 2851.6384                         | X <sub>1/2</sub> | X <sub>3/2</sub> | 7    | 6     | 12.5 | 12.5  |
| 2852.098                          | 2852.1020                         | X <sub>1/2</sub> | X <sub>1/2</sub> | 6    | 5     | 3.5  | 2.5   |
| 2857.721                          | 2857.7188                         | X <sub>3/2</sub> | X <sub>3/2</sub> | 4    | 3     | 7.5  | 6.5   |
| 2857.914                          | 2857.9087                         | X <sub>1/2</sub> | X <sub>3/2</sub> | 6    | 5     | 3.5  | 2.5   |
| 2858.232                          | 2858.2351                         | X <sub>3/2</sub> | X <sub>3/2</sub> | 4    | 3     | 7.5  | 6.5   |
| 2862.178                          | 2862.1738                         | X <sub>3/2</sub> | X <sub>1/2</sub> | 13   | 11    | 5.5  | 4.5   |
| 2864.373                          | 2864.3776                         | X <sub>3/2</sub> | X <sub>1/2</sub> | 2    | 0     | 47.5 | 47.5  |
| 2867.170                          | 2867.1683                         | X <sub>1/2</sub> | X <sub>1/2</sub> | 4    | 3     | 6.5  | 5.5   |
| 2867.404                          | 2867.4078                         | X <sub>1/2</sub> | X <sub>1/2</sub> | 4    | 3     | 6.5  | 5.5   |
| 2872.328                          | 2872.3286                         | X <sub>1/2</sub> | X <sub>1/2</sub> | 2    | 1     | 27.5 | 27.5  |
| 2881.084                          | 2881.0817                         | X <sub>3/2</sub> | X <sub>1/2</sub> | 3    | 2     | 7.5  | 7.5   |
| 2885.435                          | 2885.4379                         | X <sub>1/2</sub> | X <sub>3/2</sub> | 5    | 4     | 11.5 | 10.5  |
| 2886.275                          | 2886.2734                         | X <sub>3/2</sub> | X <sub>3/2</sub> | 3    | 2     | 10.5 | 9.5   |
| 2889.080                          | 2889.0761                         | X <sub>3/2</sub> | X <sub>1/2</sub> | 2    | 1     | 26.5 | 25.5  |
| 2890.003                          | 2890.0029                         | X <sub>3/2</sub> | X <sub>3/2</sub> | 1    | 0     | 16.5 | 15.5  |
| 2890.670                          | 2890.6739                         | X <sub>3/2</sub> | X <sub>1/2</sub> | 2    | 0     | 40.5 | 39.5  |
| 2890.905                          | 2890.9021                         | X <sub>1/2</sub> | X <sub>1/2</sub> | 3    | 2     | 9.5  | 8.5   |
| 2891.506                          | 2891.5070                         | X <sub>3/2</sub> | X <sub>3/2</sub> | 1    | 0     | 16.5 | 15.5  |
| 2892.381                          | 2892.3835                         | X <sub>1/2</sub> | X <sub>1/2</sub> | 1    | 0     | 15.5 | 14.5  |
| 2893.533                          | 2893.5306                         | X <sub>1/2</sub> | X <sub>1/2</sub> | 1    | 0     | 15.5 | 14.5  |
| 2895.560                          | 2895.5626                         | X <sub>3/2</sub> | X <sub>3/2</sub> | 2    | 1     | 13.5 | 12.5  |
| 2895.958                          | 2895.9590                         | X <sub>3/2</sub> | X <sub>3/2</sub> | 4    | 3     | 6.5  | 5.5   |
| 2896.064                          | 2896.0686                         | X <sub>1/2</sub> | X <sub>1/2</sub> | 5    | 4     | 4.5  | 4.5   |
| 2896.373                          | 2896.3751                         | X <sub>3/2</sub> | X <sub>3/2</sub> | 4    | 3     | 6.5  | 5.5   |
| 2896.733                          | 2896.7346                         | X <sub>3/2</sub> | X <sub>3/2</sub> | 2    | 1     | 13.5 | 12.5  |
| 2899.036                          | 2899.0363                         | X <sub>1/2</sub> | X <sub>1/2</sub> | 2    | 1     | 12.5 | 11.5  |
| 2899.878                          | 2899.8732                         | X <sub>1/2</sub> | X <sub>1/2</sub> | 2    | 1     | 12.5 | 11.5  |
| 2901.970                          | 2901.9660                         | X <sub>3/2</sub> | X <sub>3/2</sub> | 5    | 4     | 4.5  | 4.5   |
| 2904.605                          | 2904.6106                         | X <sub>1/2</sub> | X <sub>3/2</sub> | 4    | 3     | 18.5 | 17.5  |
| 2907.488                          | 2907.4925                         | X <sub>1/2</sub> | X <sub>1/2</sub> | 4    | 3     | 5.5  | 4.5   |
| 2907.641                          | 2907.6385                         | X <sub>1/2</sub> | X <sub>1/2</sub> | 4    | 3     | 5.5  | 4.5   |
| 2914.691                          | 2914.6862                         | X <sub>1/2</sub> | X <sub>3/2</sub> | 13   | 11    | 9.5  | 8.5   |
| 2923.471                          | 2923.4663                         | X <sub>1/2</sub> | X <sub>3/2</sub> | 8    | 7     | 10.5 | 9.5   |

Table S1 (continued)

| $v_{\text{exp}} (\text{cm}^{-1})$ | $v_{\text{the}} (\text{cm}^{-1})$ | GUQ              | GLQ              | $v'$ | $v''$ | $J'$ | $J''$ |
|-----------------------------------|-----------------------------------|------------------|------------------|------|-------|------|-------|
| 2928.156                          | 2928.1513                         | X <sub>1/2</sub> | X <sub>3/2</sub> | 4    | 3     | 17.5 | 16.5  |
| 2928.773                          | 2928.7749                         | X <sub>3/2</sub> | X <sub>3/2</sub> | 3    | 2     | 9.5  | 8.5   |
| 2929.521                          | 2929.5190                         | X <sub>3/2</sub> | X <sub>3/2</sub> | 3    | 2     | 9.5  | 8.5   |
| 2932.769                          | 2932.7695                         | X <sub>3/2</sub> | X <sub>3/2</sub> | 4    | 3     | 5.5  | 4.5   |
| 2933.082                          | 2933.0840                         | X <sub>3/2</sub> | X <sub>3/2</sub> | 4    | 3     | 5.5  | 4.5   |
| 2935.220                          | 2935.2225                         | X <sub>1/2</sub> | X <sub>1/2</sub> | 3    | 2     | 8.5  | 7.5   |
| 2935.669                          | 2935.6747                         | X <sub>1/2</sub> | X <sub>1/2</sub> | 3    | 2     | 8.5  | 7.5   |
| 2936.420                          | 2936.4180                         | X <sub>3/2</sub> | X <sub>1/2</sub> | 1    | 0     | 29.5 | 28.5  |
| 2936.521                          | 2936.5260                         | X <sub>1/2</sub> | X <sub>3/2</sub> | 3    | 2     | 22.5 | 21.5  |
| 2938.785                          | 2938.7820                         | X <sub>3/2</sub> | X <sub>1/2</sub> | 1    | 0     | 8.5  | 7.5   |
| 2939.825                          | 2939.8249                         | X <sub>1/2</sub> | X <sub>3/2</sub> | 1    | 0     | 32.5 | 31.5  |
| 2941.861                          | 2941.8603                         | X <sub>3/2</sub> | X <sub>3/2</sub> | 1    | 0     | 15.5 | 14.5  |
| 2942.722                          | 2942.7242                         | X <sub>1/2</sub> | X <sub>3/2</sub> | 7    | 6     | 5.5  | 4.5   |
| 2943.271                          | 2943.2700                         | X <sub>3/2</sub> | X <sub>3/2</sub> | 1    | 0     | 15.5 | 14.5  |
| 2943.390                          | 2943.3909                         | X <sub>3/2</sub> | X <sub>3/2</sub> | 2    | 1     | 12.5 | 11.5  |
| 2945.334                          | 2945.3301                         | X <sub>1/2</sub> | X <sub>3/2</sub> | 6    | 5     | 3.5  | 3.5   |
| 2945.571                          | 2945.5694                         | X <sub>1/2</sub> | X <sub>1/2</sub> | 1    | 0     | 14.5 | 13.5  |
| 2946.855                          | 2946.8547                         | X <sub>1/2</sub> | X <sub>3/2</sub> | 2    | 1     | 46.5 | 46.5  |
| 2947.355                          | 2947.3548                         | X <sub>1/2</sub> | X <sub>1/2</sub> | 2    | 1     | 11.5 | 10.5  |
| 2948.105                          | 2948.1017                         | X <sub>1/2</sub> | X <sub>1/2</sub> | 2    | 1     | 11.5 | 10.5  |
| 2956.908                          | 2956.9075                         | X <sub>3/2</sub> | X <sub>3/2</sub> | 13   | 11    | 3.5  | 2.5   |
| 2958.895                          | 2958.8905                         | X <sub>1/2</sub> | X <sub>1/2</sub> | 1    | 0     | 29.5 | 29.5  |
| 2960.715                          | 2960.7161                         | X <sub>3/2</sub> | X <sub>3/2</sub> | 6    | 5     | 24.5 | 23.5  |
| 2961.030                          | 2961.0325                         | X <sub>1/2</sub> | X <sub>1/2</sub> | 6    | 5     | 23.5 | 22.5  |
| 2963.479                          | 2963.4750                         | X <sub>3/2</sub> | X <sub>1/2</sub> | 1    | 0     | 12.5 | 12.5  |
| 2963.672                          | 2963.6684                         | X <sub>1/2</sub> | X <sub>1/2</sub> | 5    | 4     | 1.5  | 0.5   |
| 2964.226                          | 2964.2254                         | X <sub>3/2</sub> | X <sub>3/2</sub> | 1    | 0     | 30.5 | 30.5  |
| 2964.686                          | 2964.6890                         | X <sub>1/2</sub> | X <sub>3/2</sub> | 6    | 5     | 24.5 | 24.5  |
| 2965.529                          | 2965.5266                         | X <sub>3/2</sub> | X <sub>3/2</sub> | 4    | 3     | 12.5 | 12.5  |
| 2966.544                          | 2966.5493                         | X <sub>1/2</sub> | X <sub>3/2</sub> | 3    | 2     | 21.5 | 20.5  |
| 2967.036                          | 2967.0400                         | X <sub>1/2</sub> | X <sub>1/2</sub> | 13   | 11    | 9.5  | 8.5   |
| 2968.038                          | 2968.0379                         | X <sub>3/2</sub> | X <sub>3/2</sub> | 4    | 3     | 4.5  | 3.5   |
| 2968.257                          | 2968.2514                         | X <sub>3/2</sub> | X <sub>3/2</sub> | 4    | 3     | 4.5  | 3.5   |
| 2968.427                          | 2968.4297                         | X <sub>1/2</sub> | X <sub>3/2</sub> | 6    | 5     | 24.5 | 24.5  |
| 2970.976                          | 2970.9753                         | X <sub>3/2</sub> | X <sub>3/2</sub> | 3    | 2     | 8.5  | 7.5   |
| 2971.620                          | 2971.6201                         | X <sub>3/2</sub> | X <sub>3/2</sub> | 3    | 2     | 8.5  | 7.5   |
| 2975.969                          | 2975.9640                         | X <sub>3/2</sub> | X <sub>3/2</sub> | 4    | 3     | 12.5 | 12.5  |
| 2978.682                          | 2978.6790                         | X <sub>1/2</sub> | X <sub>1/2</sub> | 3    | 2     | 7.5  | 6.5   |
| 2978.821                          | 2978.8232                         | X <sub>3/2</sub> | X <sub>1/2</sub> | 4    | 3     | 3.5  | 2.5   |
| 2979.040                          | 2979.0378                         | X <sub>1/2</sub> | X <sub>1/2</sub> | 3    | 2     | 7.5  | 6.5   |
| 2979.632                          | 2979.6280                         | X <sub>1/2</sub> | X <sub>3/2</sub> | 1    | 0     | 31.5 | 30.5  |
| 2980.388                          | 2980.3903                         | X <sub>1/2</sub> | X <sub>3/2</sub> | 7    | 6     | 6.5  | 5.5   |
| 2981.240                          | 2981.2385                         | X <sub>1/2</sub> | X <sub>1/2</sub> | 6    | 5     | 10.5 | 9.5   |

Table S1 (continued)

| $\nu_{\text{exp}} (\text{cm}^{-1})$ | $\nu_{\text{the}} (\text{cm}^{-1})$ | GUQ              | GLQ              | $\nu'$ | $\nu''$ | $J'$ | $J''$ |
|-------------------------------------|-------------------------------------|------------------|------------------|--------|---------|------|-------|
| 2982.930                            | 2982.9356                           | X <sub>1/2</sub> | X <sub>1/2</sub> | 13     | 11      | 2.5  | 2.5   |
| 2983.165                            | 2983.1633                           | X <sub>1/2</sub> | X <sub>1/2</sub> | 13     | 11      | 2.5  | 2.5   |
| 2987.763                            | 2987.7583                           | X <sub>1/2</sub> | X <sub>3/2</sub> | 13     | 11      | 10.5 | 10.5  |
| 2988.189                            | 2988.1932                           | X <sub>3/2</sub> | X <sub>3/2</sub> | 6      | 5       | 22.5 | 21.5  |
| 2990.281                            | 2990.2823                           | X <sub>3/2</sub> | X <sub>3/2</sub> | 2      | 1       | 11.5 | 10.5  |
| 2990.976                            | 2990.9731                           | X <sub>3/2</sub> | X <sub>3/2</sub> | 1      | 0       | 28.5 | 28.5  |
| 2991.259                            | 2991.2599                           | X <sub>3/2</sub> | X <sub>3/2</sub> | 2      | 1       | 11.5 | 10.5  |
| 2992.949                            | 2992.9487                           | X <sub>3/2</sub> | X <sub>3/2</sub> | 1      | 0       | 14.5 | 13.5  |
| 2994.265                            | 2994.2623                           | X <sub>3/2</sub> | X <sub>3/2</sub> | 1      | 0       | 14.5 | 13.5  |
| 2994.851                            | 2994.8542                           | X <sub>1/2</sub> | X <sub>1/2</sub> | 2      | 1       | 10.5 | 9.5   |
| 2995.514                            | 2995.5099                           | X <sub>1/2</sub> | X <sub>1/2</sub> | 2      | 1       | 10.5 | 9.5   |
| 2995.751                            | 2995.7517                           | X <sub>3/2</sub> | X <sub>1/2</sub> | 3      | 2       | 17.5 | 16.5  |
| 2995.922                            | 2995.9231                           | X <sub>1/2</sub> | X <sub>1/2</sub> | 1      | 0       | 13.5 | 12.5  |
| 2996.896                            | 2996.8917                           | X <sub>1/2</sub> | X <sub>1/2</sub> | 1      | 0       | 13.5 | 12.5  |
| 3001.790                            | 3001.7913                           | X <sub>3/2</sub> | X <sub>3/2</sub> | 4      | 3       | 3.5  | 2.5   |
| 3011.946                            | 3011.9450                           | X <sub>3/2</sub> | X <sub>3/2</sub> | 3      | 2       | 7.5  | 6.5   |
| 3012.858                            | 3012.8597                           | X <sub>1/2</sub> | X <sub>1/2</sub> | 6      | 5       | 14.5 | 13.5  |
| 3013.566                            | 3013.5665                           | X <sub>3/2</sub> | X <sub>3/2</sub> | 6      | 5       | 15.5 | 14.5  |
| 3015.970                            | 3015.9746                           | X <sub>1/2</sub> | X <sub>3/2</sub> | 6      | 5       | 9.5  | 9.5   |
| 3016.857                            | 3016.8604                           | X <sub>3/2</sub> | X <sub>3/2</sub> | 6      | 5       | 17.5 | 16.5  |
| 3016.990                            | 3016.9867                           | X <sub>3/2</sub> | X <sub>3/2</sub> | 6      | 5       | 17.5 | 16.5  |
| 3018.333                            | 3018.3303                           | X <sub>1/2</sub> | X <sub>3/2</sub> | 8      | 7       | 14.5 | 13.5  |
| 3021.287                            | 3021.2929                           | X <sub>1/2</sub> | X <sub>1/2</sub> | 5      | 4       | 3.5  | 2.5   |
| 3021.543                            | 3021.5446                           | X <sub>1/2</sub> | X <sub>1/2</sub> | 3      | 2       | 6.5  | 5.5   |
| 3025.773                            | 3025.7764                           | X <sub>3/2</sub> | X <sub>3/2</sub> | 4      | 3       | 8.5  | 8.5   |
| 3032.281                            | 3032.2812                           | X <sub>3/2</sub> | X <sub>3/2</sub> | 5      | 4       | 4.5  | 3.5   |
| 3032.502                            | 3032.4965                           | X <sub>3/2</sub> | X <sub>3/2</sub> | 5      | 4       | 4.5  | 3.5   |
| 3036.173                            | 3036.1732                           | X <sub>3/2</sub> | X <sub>3/2</sub> | 2      | 1       | 10.5 | 9.5   |
| 3037.050                            | 3037.0519                           | X <sub>3/2</sub> | X <sub>3/2</sub> | 2      | 1       | 10.5 | 9.5   |
| 3041.509                            | 3041.5096                           | X <sub>1/2</sub> | X <sub>1/2</sub> | 2      | 1       | 9.5  | 8.5   |
| 3042.073                            | 3042.0729                           | X <sub>1/2</sub> | X <sub>1/2</sub> | 2      | 1       | 9.5  | 8.5   |
| 3043.217                            | 3043.2137                           | X <sub>3/2</sub> | X <sub>3/2</sub> | 1      | 0       | 13.5 | 12.5  |
| 3043.830                            | 3043.8252                           | X <sub>1/2</sub> | X <sub>1/2</sub> | 13     | 11      | 4.5  | 3.5   |
| 3044.431                            | 3044.4298                           | X <sub>3/2</sub> | X <sub>3/2</sub> | 1      | 0       | 13.5 | 12.5  |
| 3045.816                            | 3045.8194                           | X <sub>1/2</sub> | X <sub>1/2</sub> | 1      | 0       | 48.5 | 47.5  |
| 3046.582                            | 3046.5811                           | X <sub>1/2</sub> | X <sub>1/2</sub> | 1      | 0       | 12.5 | 11.5  |
| 3047.463                            | 3047.4583                           | X <sub>1/2</sub> | X <sub>1/2</sub> | 1      | 0       | 12.5 | 11.5  |
| 3047.833                            | 3047.8312                           | X <sub>1/2</sub> | X <sub>3/2</sub> | 6      | 5       | 16.5 | 16.5  |
| 3050.889                            | 3050.8871                           | X <sub>1/2</sub> | X <sub>3/2</sub> | 1      | 0       | 28.5 | 27.5  |
| 3051.582                            | 3051.5819                           | X <sub>3/2</sub> | X <sub>3/2</sub> | 3      | 2       | 6.5  | 5.5   |
| 3052.018                            | 3052.0222                           | X <sub>3/2</sub> | X <sub>3/2</sub> | 3      | 2       | 6.5  | 5.5   |
| 3052.389                            | 3052.3931                           | X <sub>1/2</sub> | X <sub>1/2</sub> | 4      | 3       | 35.5 | 34.5  |
| 3053.134                            | 3053.1352                           | X <sub>3/2</sub> | X <sub>1/2</sub> | 3      | 2       | 15.5 | 14.5  |

Table S1 (continued)

| $\nu_{\text{exp}} (\text{cm}^{-1})$ | $\nu_{\text{the}} (\text{cm}^{-1})$ | GUQ              | GLQ              | $\nu'$ | $\nu''$ | $J'$ | $J''$ |
|-------------------------------------|-------------------------------------|------------------|------------------|--------|---------|------|-------|
| 3056.780                            | 3056.7789                           | X <sub>3/2</sub> | X <sub>1/2</sub> | 3      | 1       | 43.5 | 43.5  |
| 3058.015                            | 3058.0117                           | X <sub>3/2</sub> | X <sub>3/2</sub> | 4      | 3       | 5.5  | 5.5   |
| 3063.055                            | 3063.0562                           | X <sub>1/2</sub> | X <sub>1/2</sub> | 3      | 2       | 5.5  | 4.5   |
| 3063.221                            | 3063.2208                           | X <sub>1/2</sub> | X <sub>1/2</sub> | 3      | 2       | 5.5  | 4.5   |
| 3067.016                            | 3067.0196                           | X <sub>1/2</sub> | X <sub>3/2</sub> | 3      | 2       | 40.5 | 40.5  |
| 3069.504                            | 3069.5043                           | X <sub>1/2</sub> | X <sub>1/2</sub> | 3      | 1       | 44.5 | 43.5  |
| 3071.691                            | 3071.6903                           | X <sub>1/2</sub> | X <sub>1/2</sub> | 1      | 0       | 25.5 | 25.5  |
| 3073.515                            | 3073.5207                           | X <sub>3/2</sub> | X <sub>3/2</sub> | 4      | 3       | 2.5  | 2.5   |
| 3074.559                            | 3074.5613                           | X <sub>1/2</sub> | X <sub>1/2</sub> | 4      | 3       | 1.5  | 1.5   |
| 3076.574                            | 3076.5764                           | X <sub>3/2</sub> | X <sub>3/2</sub> | 4      | 3       | 1.5  | 1.5   |
| 3080.416                            | 3080.4114                           | X <sub>3/2</sub> | X <sub>1/2</sub> | 2      | 1       | 20.5 | 19.5  |
| 3080.993                            | 3080.9937                           | X <sub>3/2</sub> | X <sub>3/2</sub> | 2      | 1       | 9.5  | 8.5   |
| 3081.771                            | 3081.7720                           | X <sub>3/2</sub> | X <sub>3/2</sub> | 2      | 1       | 9.5  | 8.5   |
| 3087.306                            | 3087.3054                           | X <sub>1/2</sub> | X <sub>1/2</sub> | 2      | 1       | 8.5  | 7.5   |
| 3087.775                            | 3087.7746                           | X <sub>1/2</sub> | X <sub>1/2</sub> | 2      | 1       | 8.5  | 7.5   |
| 3089.767                            | 3089.7681                           | X <sub>3/2</sub> | X <sub>3/2</sub> | 3      | 2       | 5.5  | 4.5   |
| 3090.102                            | 3090.1031                           | X <sub>3/2</sub> | X <sub>3/2</sub> | 3      | 2       | 5.5  | 4.5   |
| 3092.600                            | 3092.5985                           | X <sub>3/2</sub> | X <sub>3/2</sub> | 1      | 0       | 12.5 | 11.5  |
| 3093.712                            | 3093.7155                           | X <sub>3/2</sub> | X <sub>3/2</sub> | 1      | 0       | 12.5 | 11.5  |
| 3093.985                            | 3093.9803                           | X <sub>1/2</sub> | X <sub>3/2</sub> | 2      | 1       | 23.5 | 22.5  |
| 3096.446                            | 3096.4481                           | X <sub>1/2</sub> | X <sub>1/2</sub> | 1      | 0       | 11.5 | 10.5  |
| 3097.233                            | 3097.2327                           | X <sub>1/2</sub> | X <sub>1/2</sub> | 1      | 0       | 11.5 | 10.5  |
| 3098.740                            | 3098.7366                           | X <sub>1/2</sub> | X <sub>3/2</sub> | 3      | 2       | 16.5 | 15.5  |
| 3104.038                            | 3104.0349                           | X <sub>1/2</sub> | X <sub>1/2</sub> | 3      | 2       | 4.5  | 3.5   |
| 3104.106                            | 3104.1010                           | X <sub>1/2</sub> | X <sub>1/2</sub> | 3      | 2       | 4.5  | 3.5   |
| 3120.086                            | 3120.0920                           | X <sub>1/2</sub> | X <sub>1/2</sub> | 2      | 1       | 43.5 | 42.5  |
| 3121.589                            | 3121.5841                           | X <sub>3/2</sub> | X <sub>3/2</sub> | 3      | 2       | 13.5 | 13.5  |
| 3124.666                            | 3124.6647                           | X <sub>3/2</sub> | X <sub>3/2</sub> | 2      | 1       | 8.5  | 7.5   |
| 3125.340                            | 3125.3410                           | X <sub>3/2</sub> | X <sub>3/2</sub> | 2      | 1       | 8.5  | 7.5   |
| 3126.376                            | 3126.3772                           | X <sub>3/2</sub> | X <sub>3/2</sub> | 3      | 2       | 4.5  | 3.5   |
| 3126.604                            | 3126.6064                           | X <sub>3/2</sub> | X <sub>3/2</sub> | 3      | 2       | 4.5  | 3.5   |
| 3127.411                            | 3127.4094                           | X <sub>3/2</sub> | X <sub>1/2</sub> | 3      | 2       | 10.5 | 9.5   |
| 3132.238                            | 3132.2381                           | X <sub>1/2</sub> | X <sub>1/2</sub> | 2      | 1       | 7.5  | 6.5   |
| 3132.615                            | 3132.6111                           | X <sub>1/2</sub> | X <sub>1/2</sub> | 2      | 1       | 7.5  | 6.5   |
| 3133.528                            | 3133.5257                           | X <sub>3/2</sub> | X <sub>1/2</sub> | 2      | 1       | 18.5 | 17.5  |
| 3136.941                            | 3136.9426                           | X <sub>1/2</sub> | X <sub>1/2</sub> | 3      | 2       | 11.5 | 11.5  |
| 3138.866                            | 3138.8648                           | X <sub>1/2</sub> | X <sub>3/2</sub> | 2      | 1       | 43.5 | 43.5  |
| 3141.044                            | 3141.0422                           | X <sub>3/2</sub> | X <sub>3/2</sub> | 1      | 0       | 11.5 | 10.5  |
| 3142.060                            | 3142.0589                           | X <sub>3/2</sub> | X <sub>3/2</sub> | 1      | 0       | 11.5 | 10.5  |
| 3144.651                            | 3144.6488                           | X <sub>3/2</sub> | X <sub>3/2</sub> | 3      | 2       | 11.5 | 11.5  |
| 3145.495                            | 3145.4920                           | X <sub>1/2</sub> | X <sub>1/2</sub> | 1      | 0       | 10.5 | 9.5   |
| 3146.184                            | 3146.1825                           | X <sub>1/2</sub> | X <sub>1/2</sub> | 1      | 0       | 10.5 | 9.5   |
| 3147.785                            | 3147.7831                           | X <sub>3/2</sub> | X <sub>1/2</sub> | 3      | 2       | 7.5  | 6.5   |

Table S1 (continued)

| $\nu_{\text{exp}} (\text{cm}^{-1})$ | $\nu_{\text{the}} (\text{cm}^{-1})$ | GUQ              | GLQ              | $\nu'$ | $\nu''$ | $J'$ | $J''$ |
|-------------------------------------|-------------------------------------|------------------|------------------|--------|---------|------|-------|
| 3148.611                            | 3148.6093                           | X <sub>3/2</sub> | X <sub>3/2</sub> | 4      | 3       | 2.5  | 1.5   |
| 3151.843                            | 3151.8400                           | X <sub>3/2</sub> | X <sub>1/2</sub> | 1      | 0       | 23.5 | 22.5  |
| 3160.261                            | 3160.2643                           | X <sub>1/2</sub> | X <sub>3/2</sub> | 3      | 2       | 38.5 | 38.5  |
| 3161.425                            | 3161.4285                           | X <sub>3/2</sub> | X <sub>3/2</sub> | 3      | 2       | 3.5  | 2.5   |
| 3163.809                            | 3163.8054                           | X <sub>1/2</sub> | X <sub>3/2</sub> | 6      | 5       | 6.5  | 5.5   |
| 3164.742                            | 3164.7432                           | X <sub>1/2</sub> | X <sub>3/2</sub> | 13     | 11      | 11.5 | 10.5  |
| 3165.658                            | 3165.6590                           | X <sub>3/2</sub> | X <sub>3/2</sub> | 5      | 4       | 24.5 | 23.5  |
| 3167.096                            | 3167.0945                           | X <sub>3/2</sub> | X <sub>3/2</sub> | 2      | 1       | 7.5  | 6.5   |
| 3167.666                            | 3167.6666                           | X <sub>3/2</sub> | X <sub>3/2</sub> | 2      | 1       | 7.5  | 6.5   |
| 3175.415                            | 3175.4138                           | X <sub>1/2</sub> | X <sub>1/2</sub> | 1      | 0       | 46.5 | 45.5  |
| 3176.318                            | 3176.3212                           | X <sub>1/2</sub> | X <sub>1/2</sub> | 2      | 1       | 6.5  | 5.5   |
| 3176.596                            | 3176.5956                           | X <sub>1/2</sub> | X <sub>1/2</sub> | 2      | 1       | 6.5  | 5.5   |
| 3177.621                            | 3177.6205                           | X <sub>3/2</sub> | X <sub>1/2</sub> | 3      | 1       | 42.5 | 42.5  |
| 3183.472                            | 3183.4730                           | X <sub>1/2</sub> | X <sub>1/2</sub> | 3      | 2       | 2.5  | 1.5   |
| 3183.843                            | 3183.8477                           | X <sub>1/2</sub> | X <sub>3/2</sub> | 3      | 2       | 12.5 | 11.5  |
| 3188.097                            | 3188.0997                           | X <sub>1/2</sub> | X <sub>1/2</sub> | 5      | 4       | 21.5 | 20.5  |
| 3188.481                            | 3188.4794                           | X <sub>3/2</sub> | X <sub>3/2</sub> | 1      | 0       | 10.5 | 9.5   |
| 3189.393                            | 3189.3945                           | X <sub>3/2</sub> | X <sub>3/2</sub> | 1      | 0       | 10.5 | 9.5   |
| 3192.718                            | 3192.7215                           | X <sub>1/2</sub> | X <sub>1/2</sub> | 3      | 2       | 7.5  | 7.5   |
| 3193.401                            | 3193.4037                           | X <sub>3/2</sub> | X <sub>3/2</sub> | 5      | 4       | 14.5 | 13.5  |
| 3193.689                            | 3193.6869                           | X <sub>1/2</sub> | X <sub>1/2</sub> | 1      | 0       | 9.5  | 8.5   |
| 3194.284                            | 3194.2819                           | X <sub>1/2</sub> | X <sub>1/2</sub> | 1      | 0       | 9.5  | 8.5   |
| 3195.925                            | 3195.9268                           | X <sub>1/2</sub> | X <sub>1/2</sub> | 5      | 4       | 20.5 | 19.5  |
| 3196.032                            | 3196.0310                           | X <sub>3/2</sub> | X <sub>3/2</sub> | 4      | 3       | 32.5 | 31.5  |
| 3201.546                            | 3201.5426                           | X <sub>1/2</sub> | X <sub>3/2</sub> | 13     | 11      | 2.5  | 1.5   |
| 3201.631                            | 3201.6361                           | X <sub>1/2</sub> | X <sub>1/2</sub> | 5      | 4       | 19.5 | 18.5  |
| 3205.872                            | 3205.8669                           | X <sub>1/2</sub> | X <sub>3/2</sub> | 6      | 5       | 7.5  | 6.5   |
| 3206.354                            | 3206.3478                           | X <sub>1/2</sub> | X <sub>1/2</sub> | 5      | 4       | 16.5 | 15.5  |
| 3206.931                            | 3206.9285                           | X <sub>1/2</sub> | X <sub>1/2</sub> | 5      | 4       | 17.5 | 16.5  |
| 3208.176                            | 3208.1747                           | X <sub>3/2</sub> | X <sub>3/2</sub> | 2      | 1       | 6.5  | 5.5   |
| 3208.638                            | 3208.6401                           | X <sub>3/2</sub> | X <sub>3/2</sub> | 2      | 1       | 6.5  | 5.5   |
| 3210.348                            | 3210.3485                           | X <sub>1/2</sub> | X <sub>1/2</sub> | 2      | 1       | 15.5 | 15.5  |
| 3211.157                            | 3211.1587                           | X <sub>3/2</sub> | X <sub>1/2</sub> | 12     | 10      | 10.5 | 9.5   |
| 3213.243                            | 3213.2383                           | X <sub>3/2</sub> | X <sub>1/2</sub> | 1      | 0       | 22.5 | 21.5  |
| 3219.583                            | 3219.5872                           | X <sub>1/2</sub> | X <sub>1/2</sub> | 2      | 1       | 5.5  | 4.5   |
| 3219.764                            | 3219.7602                           | X <sub>1/2</sub> | X <sub>1/2</sub> | 2      | 1       | 5.5  | 4.5   |
| 3219.933                            | 3219.9282                           | X <sub>3/2</sub> | X <sub>1/2</sub> | 1      | 0       | 4.5  | 3.5   |
| 3220.432                            | 3220.4334                           | X <sub>1/2</sub> | X <sub>3/2</sub> | 3      | 2       | 10.5 | 9.5   |
| 3224.939                            | 3224.9367                           | X <sub>3/2</sub> | X <sub>3/2</sub> | 4      | 3       | 5.5  | 4.5   |
| 3225.943                            | 3225.9419                           | X <sub>1/2</sub> | X <sub>3/2</sub> | 5      | 4       | 19.5 | 19.5  |
| 3227.887                            | 3227.8930                           | X <sub>1/2</sub> | X <sub>3/2</sub> | 13     | 11      | 7.5  | 6.5   |
| 3228.062                            | 3228.0589                           | X <sub>1/2</sub> | X <sub>1/2</sub> | 3      | 2       | 3.5  | 3.5   |
| 3228.622                            | 3228.6218                           | X <sub>3/2</sub> | X <sub>1/2</sub> | 9      | 7       | 19.5 | 18.5  |



Table S1 (continued)

| $\nu_{\text{exp}} (\text{cm}^{-1})$ | $\nu_{\text{the}} (\text{cm}^{-1})$ | GUQ              | GLQ              | $\nu'$ | $\nu''$ | $J'$ | $J''$ |
|-------------------------------------|-------------------------------------|------------------|------------------|--------|---------|------|-------|
| 3230.185                            | 3230.1809                           | X <sub>1/2</sub> | X <sub>3/2</sub> | 5      | 4       | 14.5 | 14.5  |
| 3231.647                            | 3231.6464                           | X <sub>3/2</sub> | X <sub>3/2</sub> | 3      | 2       | 3.5  | 3.5   |
| 3232.391                            | 3232.3928                           | X <sub>3/2</sub> | X <sub>3/2</sub> | 3      | 2       | 3.5  | 3.5   |
| 3233.606                            | 3233.6099                           | X <sub>1/2</sub> | X <sub>1/2</sub> | 3      | 2       | 2.5  | 2.5   |
| 3234.659                            | 3234.6582                           | X <sub>1/2</sub> | X <sub>1/2</sub> | 3      | 2       | 36.5 | 35.5  |
| 3234.839                            | 3234.8379                           | X <sub>3/2</sub> | X <sub>3/2</sub> | 1      | 0       | 9.5  | 8.5   |
| 3235.650                            | 3235.6499                           | X <sub>3/2</sub> | X <sub>3/2</sub> | 1      | 0       | 9.5  | 8.5   |
| 3238.196                            | 3238.1923                           | X <sub>1/2</sub> | X <sub>1/2</sub> | 1      | 0       | 20.5 | 20.5  |
| 3239.246                            | 3239.2437                           | X <sub>3/2</sub> | X <sub>3/2</sub> | 3      | 2       | 1.5  | 1.5   |
| 3239.837                            | 3239.8362                           | X <sub>1/2</sub> | X <sub>1/2</sub> | 1      | 0       | 45.5 | 44.5  |
| 3241.018                            | 3241.0164                           | X <sub>1/2</sub> | X <sub>1/2</sub> | 1      | 0       | 8.5  | 7.5   |
| 3241.516                            | 3241.5146                           | X <sub>1/2</sub> | X <sub>1/2</sub> | 4      | 3       | 5.5  | 4.5   |
| 3243.610                            | 3243.6144                           | X <sub>3/2</sub> | X <sub>1/2</sub> | 7      | 5       | 25.5 | 24.5  |
| 3244.210                            | 3244.2065                           | X <sub>1/2</sub> | X <sub>1/2</sub> | 2      | 1       | 14.5 | 14.5  |
| 3247.779                            | 3247.7779                           | X <sub>3/2</sub> | X <sub>3/2</sub> | 2      | 1       | 5.5  | 4.5   |
| 3248.134                            | 3248.1339                           | X <sub>3/2</sub> | X <sub>3/2</sub> | 2      | 1       | 5.5  | 4.5   |
| 3249.058                            | 3249.0566                           | X <sub>1/2</sub> | X <sub>3/2</sub> | 3      | 2       | 36.5 | 36.5  |
| 3251.413                            | 3251.4092                           | X <sub>3/2</sub> | X <sub>1/2</sub> | 2      | 1       | 13.5 | 12.5  |
| 3256.601                            | 3256.5985                           | X <sub>1/2</sub> | X <sub>3/2</sub> | 4      | 3       | 1.5  | 1.5   |
| 3257.779                            | 3257.7808                           | X <sub>1/2</sub> | X <sub>3/2</sub> | 1      | 0       | 22.5 | 21.5  |
| 3262.679                            | 3262.6769                           | X <sub>1/2</sub> | X <sub>1/2</sub> | 11     | 9       | 14.5 | 13.5  |
| 3263.003                            | 3263.0051                           | X <sub>3/2</sub> | X <sub>3/2</sub> | 1      | 0       | 20.5 | 20.5  |
| 3267.222                            | 3267.2211                           | X <sub>1/2</sub> | X <sub>3/2</sub> | 4      | 3       | 2.5  | 2.5   |
| 3267.530                            | 3267.5273                           | X <sub>3/2</sub> | X <sub>1/2</sub> | 1      | 0       | 5.5  | 5.5   |
| 3268.016                            | 3268.0112                           | X <sub>3/2</sub> | X <sub>1/2</sub> | 1      | 0       | 20.5 | 19.5  |
| 3269.344                            | 3269.3466                           | X <sub>3/2</sub> | X <sub>3/2</sub> | 4      | 3       | 7.5  | 6.5   |
| 3274.168                            | 3274.1732                           | X <sub>3/2</sub> | X <sub>3/2</sub> | 3      | 2       | 36.5 | 35.5  |
| 3274.286                            | 3274.2898                           | X <sub>1/2</sub> | X <sub>3/2</sub> | 2      | 1       | 16.5 | 15.5  |
| 3280.036                            | 3280.0357                           | X <sub>3/2</sub> | X <sub>3/2</sub> | 1      | 0       | 8.5  | 7.5   |
| 3280.742                            | 3280.7429                           | X <sub>3/2</sub> | X <sub>3/2</sub> | 1      | 0       | 8.5  | 7.5   |
| 3284.810                            | 3284.8089                           | X <sub>1/2</sub> | X <sub>3/2</sub> | 6      | 5       | 9.5  | 8.5   |
| 3285.763                            | 3285.7631                           | X <sub>3/2</sub> | X <sub>3/2</sub> | 2      | 1       | 4.5  | 3.5   |
| 3286.008                            | 3286.0085                           | X <sub>3/2</sub> | X <sub>3/2</sub> | 2      | 1       | 4.5  | 3.5   |
| 3287.479                            | 3287.4782                           | X <sub>1/2</sub> | X <sub>1/2</sub> | 1      | 0       | 7.5  | 6.5   |
| 3287.876                            | 3287.8763                           | X <sub>1/2</sub> | X <sub>1/2</sub> | 1      | 0       | 7.5  | 6.5   |
| 3294.768                            | 3294.7639                           | X <sub>1/2</sub> | X <sub>3/2</sub> | 4      | 3       | 28.5 | 28.5  |
| 3296.123                            | 3296.1213                           | X <sub>1/2</sub> | X <sub>1/2</sub> | 1      | 0       | 18.5 | 18.5  |
| 3299.463                            | 3299.4577                           | X <sub>1/2</sub> | X <sub>1/2</sub> | 4      | 3       | 27.5 | 26.5  |
| 3299.889                            | 3299.8935                           | X <sub>1/2</sub> | X <sub>1/2</sub> | 4      | 3       | 27.5 | 26.5  |
| 3307.468                            | 3307.4682                           | X <sub>1/2</sub> | X <sub>3/2</sub> | 1      | 0       | 44.5 | 44.5  |
| 3308.074                            | 3308.0695                           | X <sub>3/2</sub> | X <sub>3/2</sub> | 4      | 3       | 9.5  | 8.5   |
| 3309.004                            | 3309.0014                           | X <sub>1/2</sub> | X <sub>3/2</sub> | 4      | 3       | 5.5  | 5.5   |
| 3309.850                            | 3309.8443                           | X <sub>1/2</sub> | X <sub>3/2</sub> | 4      | 3       | 5.5  | 5.5   |

Table S1 (continued)

| $\nu_{\text{exp}} (\text{cm}^{-1})$ | $\nu_{\text{the}} (\text{cm}^{-1})$ | GUQ              | GLQ              | $\nu'$ | $\nu''$ | $J'$ | $J''$ |
|-------------------------------------|-------------------------------------|------------------|------------------|--------|---------|------|-------|
| 3317.669                            | 3317.6675                           | X <sub>1/2</sub> | X <sub>3/2</sub> | 6      | 5       | 10.5 | 9.5   |
| 3318.916                            | 3318.9191                           | X <sub>3/2</sub> | X <sub>3/2</sub> | 1      | 0       | 19.5 | 19.5  |
| 3319.470                            | 3319.4717                           | X <sub>3/2</sub> | X <sub>3/2</sub> | 4      | 3       | 27.5 | 26.5  |
| 3320.103                            | 3320.1079                           | X <sub>3/2</sub> | X <sub>3/2</sub> | 12     | 10      | 6.5  | 5.5   |
| 3322.001                            | 3322.0014                           | X <sub>3/2</sub> | X <sub>3/2</sub> | 2      | 1       | 3.5  | 2.5   |
| 3322.145                            | 3322.1409                           | X <sub>3/2</sub> | X <sub>3/2</sub> | 2      | 1       | 3.5  | 2.5   |
| 3323.155                            | 3323.1576                           | X <sub>1/2</sub> | X <sub>1/2</sub> | 1      | 0       | 17.5 | 17.5  |
| 3323.979                            | 3323.9772                           | X <sub>3/2</sub> | X <sub>3/2</sub> | 1      | 0       | 7.5  | 6.5   |
| 3324.575                            | 3324.5773                           | X <sub>3/2</sub> | X <sub>3/2</sub> | 1      | 0       | 7.5  | 6.5   |
| 3326.493                            | 3326.4958                           | X <sub>1/2</sub> | X <sub>1/2</sub> | 3      | 2       | 2.5  | 1.5   |
| 3330.511                            | 3330.5054                           | X <sub>1/2</sub> | X <sub>1/2</sub> | 2      | 1       | 9.5  | 9.5   |
| 3333.089                            | 3333.0887                           | X <sub>1/2</sub> | X <sub>1/2</sub> | 1      | 0       | 6.5  | 5.5   |
| 3333.386                            | 3333.3843                           | X <sub>1/2</sub> | X <sub>1/2</sub> | 1      | 0       | 6.5  | 5.5   |
| 3336.241                            | 3336.2431                           | X <sub>3/2</sub> | X <sub>3/2</sub> | 4      | 3       | 26.5 | 25.5  |
| 3340.127                            | 3340.1276                           | X <sub>3/2</sub> | X <sub>1/2</sub> | 11     | 9       | 9.5  | 8.5   |
| 3340.845                            | 3340.8413                           | X <sub>1/2</sub> | X <sub>3/2</sub> | 1      | 0       | 20.5 | 19.5  |
| 3340.949                            | 3340.9518                           | X <sub>1/2</sub> | X <sub>1/2</sub> | 12     | 10      | 7.5  | 7.5   |
| 3341.757                            | 3341.7607                           | X <sub>3/2</sub> | X <sub>1/2</sub> | 12     | 10      | 1.5  | 0.5   |
| 3341.872                            | 3341.8707                           | X <sub>3/2</sub> | X <sub>3/2</sub> | 3      | 2       | 3.5  | 2.5   |
| 3344.674                            | 3344.6773                           | X <sub>1/2</sub> | X <sub>1/2</sub> | 2      | 1       | 2.5  | 1.5   |
| 3344.787                            | 3344.7848                           | X <sub>1/2</sub> | X <sub>1/2</sub> | 2      | 1       | 2.5  | 1.5   |
| 3346.239                            | 3346.2351                           | X <sub>1/2</sub> | X <sub>1/2</sub> | 3      | 2       | 33.5 | 32.5  |
| 3347.392                            | 3347.3942                           | X <sub>1/2</sub> | X <sub>3/2</sub> | 7      | 6       | 20.5 | 19.5  |
| 3351.085                            | 3351.0795                           | X <sub>3/2</sub> | X <sub>3/2</sub> | 2      | 1       | 8.5  | 8.5   |
| 3351.396                            | 3351.3982                           | X <sub>1/2</sub> | X <sub>1/2</sub> | 4      | 3       | 24.5 | 23.5  |
| 3351.517                            | 3351.5183                           | X <sub>1/2</sub> | X <sub>1/2</sub> | 4      | 3       | 24.5 | 23.5  |
| 3351.811                            | 3351.8063                           | X <sub>3/2</sub> | X <sub>1/2</sub> | 12     | 10      | 3.5  | 2.5   |
| 3355.203                            | 3355.1983                           | X <sub>1/2</sub> | X <sub>3/2</sub> | 4      | 3       | 25.5 | 25.5  |
| 3358.125                            | 3358.1197                           | X <sub>1/2</sub> | X <sub>3/2</sub> | 6      | 5       | 11.5 | 10.5  |
| 3360.166                            | 3360.1598                           | X <sub>3/2</sub> | X <sub>1/2</sub> | 1      | 0       | 2.5  | 2.5   |
| 3366.550                            | 3366.5482                           | X <sub>3/2</sub> | X <sub>3/2</sub> | 1      | 0       | 6.5  | 5.5   |
| 3367.037                            | 3367.0383                           | X <sub>3/2</sub> | X <sub>3/2</sub> | 1      | 0       | 6.5  | 5.5   |
| 3372.980                            | 3372.9743                           | X <sub>1/2</sub> | X <sub>1/2</sub> | 2      | 0       | 44.5 | 43.5  |
| 3374.117                            | 3374.1137                           | X <sub>1/2</sub> | X <sub>1/2</sub> | 4      | 3       | 13.5 | 12.5  |
| 3377.885                            | 3377.8875                           | X <sub>1/2</sub> | X <sub>1/2</sub> | 1      | 0       | 5.5  | 4.5   |
| 3378.075                            | 3378.0773                           | X <sub>1/2</sub> | X <sub>1/2</sub> | 1      | 0       | 5.5  | 4.5   |
| 3380.712                            | 3380.7184                           | X <sub>3/2</sub> | X <sub>1/2</sub> | 1      | 0       | 1.5  | 1.5   |
| 3383.422                            | 3383.4217                           | X <sub>3/2</sub> | X <sub>3/2</sub> | 4      | 3       | 15.5 | 14.5  |
| 3384.225                            | 3384.2238                           | X <sub>1/2</sub> | X <sub>3/2</sub> | 2      | 1       | 38.5 | 38.5  |
| 3388.768                            | 3388.7677                           | X <sub>1/2</sub> | X <sub>1/2</sub> | 4      | 3       | 15.5 | 14.5  |
| 3389.176                            | 3389.1720                           | X <sub>1/2</sub> | X <sub>1/2</sub> | 4      | 3       | 20.5 | 19.5  |
| 3391.334                            | 3391.3333                           | X <sub>1/2</sub> | X <sub>3/2</sub> | 4      | 3       | 11.5 | 11.5  |
| 3391.800                            | 3391.7963                           | X <sub>1/2</sub> | X <sub>3/2</sub> | 2      | 1       | 38.5 | 38.5  |

Table S1 (continued)

| $\nu_{\text{exp}} (\text{cm}^{-1})$ | $\nu_{\text{the}} (\text{cm}^{-1})$ | GUQ       | GLQ       | $\nu'$ | $\nu''$ | $J'$ | $J''$ |
|-------------------------------------|-------------------------------------|-----------|-----------|--------|---------|------|-------|
| 3393.414                            | 3393.4149                           | $X_{3/2}$ | $X_{3/2}$ | 4      | 3       | 20.5 | 19.5  |
| 3394.369                            | 3394.3732                           | $X_{3/2}$ | $X_{3/2}$ | 3      | 2       | 5.5  | 4.5   |
| 3394.895                            | 3394.8970                           | $X_{1/2}$ | $X_{1/2}$ | 4      | 3       | 18.5 | 17.5  |
| 3395.077                            | 3395.0742                           | $X_{1/2}$ | $X_{1/2}$ | 4      | 3       | 17.5 | 16.5  |
| 3395.246                            | 3395.2410                           | $X_{3/2}$ | $X_{3/2}$ | 2      | 1       | 3.5  | 3.5   |
| 3395.450                            | 3395.4496                           | $X_{3/2}$ | $X_{3/2}$ | 4      | 3       | 18.5 | 17.5  |
| 3396.050                            | 3396.0467                           | $X_{3/2}$ | $X_{3/2}$ | 2      | 1       | 3.5  | 3.5   |
| 3397.213                            | 3397.2118                           | $X_{1/2}$ | $X_{1/2}$ | 2      | 1       | 2.5  | 2.5   |
| 3400.085                            | 3400.0853                           | $X_{3/2}$ | $X_{3/2}$ | 2      | 1       | 2.5  | 2.5   |
| 3400.751                            | 3400.7502                           | $X_{1/2}$ | $X_{1/2}$ | 2      | 1       | 1.5  | 1.5   |
| 3402.819                            | 3402.8225                           | $X_{3/2}$ | $X_{3/2}$ | 2      | 1       | 1.5  | 1.5   |
| 3402.927                            | 3402.9322                           | $X_{1/2}$ | $X_{1/2}$ | 1      | 0       | 42.5 | 41.5  |
| 3407.375                            | 3407.3767                           | $X_{3/2}$ | $X_{3/2}$ | 3      | 2       | 32.5 | 31.5  |
| 3407.613                            | 3407.6117                           | $X_{3/2}$ | $X_{3/2}$ | 1      | 0       | 5.5  | 4.5   |
| 3407.986                            | 3407.9885                           | $X_{3/2}$ | $X_{3/2}$ | 1      | 0       | 5.5  | 4.5   |
| 3412.779                            | 3412.7785                           | $X_{1/2}$ | $X_{3/2}$ | 4      | 3       | 14.5 | 14.5  |
| 3421.927                            | 3421.9322                           | $X_{1/2}$ | $X_{1/2}$ | 1      | 0       | 4.5  | 3.5   |
| 3424.086                            | 3424.0852                           | $X_{1/2}$ | $X_{3/2}$ | 6      | 5       | 13.5 | 12.5  |
| 3434.061                            | 3434.0635                           | $X_{1/2}$ | $X_{1/2}$ | 12     | 10      | 2.5  | 1.5   |
| 3434.645                            | 3434.6455                           | $X_{3/2}$ | $X_{3/2}$ | 1      | 0       | 13.5 | 13.5  |
| 3436.804                            | 3436.7992                           | $X_{1/2}$ | $X_{1/2}$ | 3      | 2       | 6.5  | 5.5   |
| 3442.181                            | 3442.1792                           | $X_{3/2}$ | $X_{1/2}$ | 1      | 0       | 1.5  | 0.5   |
| 3447.016                            | 3447.0115                           | $X_{3/2}$ | $X_{3/2}$ | 1      | 0       | 4.5  | 3.5   |
| 3453.713                            | 3453.7093                           | $X_{1/2}$ | $X_{1/2}$ | 2      | 1       | 36.5 | 35.5  |
| 3459.906                            | 3459.9029                           | $X_{1/2}$ | $X_{1/2}$ | 12     | 10      | 10.5 | 9.5   |
| 3462.589                            | 3462.5901                           | $X_{1/2}$ | $X_{3/2}$ | 3      | 2       | 4.5  | 4.5   |
| 3464.506                            | 3464.5002                           | $X_{3/2}$ | $X_{1/2}$ | 11     | 9       | 7.5  | 6.5   |
| 3470.341                            | 3470.3419                           | $X_{1/2}$ | $X_{1/2}$ | 12     | 10      | 0.5  | 0.5   |
| 3481.673                            | 3481.6739                           | $X_{1/2}$ | $X_{1/2}$ | 3      | 2       | 28.5 | 27.5  |
| 3484.594                            | 3484.5983                           | $X_{3/2}$ | $X_{3/2}$ | 1      | 0       | 3.5  | 2.5   |
| 3484.749                            | 3484.7482                           | $X_{3/2}$ | $X_{3/2}$ | 1      | 0       | 3.5  | 2.5   |
| 3489.092                            | 3489.0907                           | $X_{3/2}$ | $X_{3/2}$ | 2      | 1       | 36.5 | 35.5  |
| 3489.472                            | 3489.4758                           | $X_{1/2}$ | $X_{1/2}$ | 2      | 1       | 35.5 | 34.5  |
| 3493.001                            | 3493.0005                           | $X_{3/2}$ | $X_{1/2}$ | 10     | 8       | 12.5 | 11.5  |
| 3494.127                            | 3494.1248                           | $X_{1/2}$ | $X_{1/2}$ | 2      | 1       | 2.5  | 1.5   |
| 3502.001                            | 3502.0002                           | $X_{1/2}$ | $X_{1/2}$ | 3      | 2       | 27.5 | 26.5  |
| 3509.564                            | 3509.5633                           | $X_{3/2}$ | $X_{3/2}$ | 2      | 1       | 3.5  | 2.5   |
| 3510.822                            | 3510.8165                           | $X_{3/2}$ | $X_{1/2}$ | 9      | 7       | 16.5 | 15.5  |
| 3512.081                            | 3512.0802                           | $X_{1/2}$ | $X_{1/2}$ | 11     | 9       | 10.5 | 9.5   |
| 3512.465                            | 3512.4673                           | $X_{1/2}$ | $X_{3/2}$ | 3      | 2       | 7.5  | 7.5   |
| 3516.726                            | 3516.7239                           | $X_{3/2}$ | $X_{3/2}$ | 12     | 10      | 2.5  | 1.5   |
| 3532.405                            | 3532.4007                           | $X_{3/2}$ | $X_{3/2}$ | 1      | 0       | 7.5  | 7.5   |
| 3534.956                            | 3534.9508                           | $X_{1/2}$ | $X_{1/2}$ | 3      | 2       | 25.5 | 24.5  |

Table S1 (continued)

| $\nu_{\text{exp}} (\text{cm}^{-1})$ | $\nu_{\text{the}} (\text{cm}^{-1})$ | GUQ              | GLQ              | $\nu'$ | $\nu''$ | $J'$ | $J''$ |
|-------------------------------------|-------------------------------------|------------------|------------------|--------|---------|------|-------|
| 3537.868                            | 3537.8657                           | X <sub>3/2</sub> | X <sub>3/2</sub> | 2      | 1       | 4.5  | 3.5   |
| 3541.038                            | 3541.0400                           | X <sub>3/2</sub> | X <sub>3/2</sub> | 3      | 1       | 41.5 | 40.5  |
| 3548.676                            | 3548.6793                           | X <sub>3/2</sub> | X <sub>1/2</sub> | 10     | 8       | 14.5 | 14.5  |
| 3556.264                            | 3556.2615                           | X <sub>1/2</sub> | X <sub>3/2</sub> | 3      | 2       | 3.5  | 2.5   |
| 3556.818                            | 3556.8180                           | X <sub>3/2</sub> | X <sub>3/2</sub> | 3      | 2       | 14.5 | 13.5  |
| 3557.133                            | 3557.1361                           | X <sub>3/2</sub> | X <sub>3/2</sub> | 2      | 1       | 34.5 | 33.5  |
| 3559.444                            | 3559.4469                           | X <sub>3/2</sub> | X <sub>3/2</sub> | 3      | 2       | 24.5 | 23.5  |
| 3564.867                            | 3564.8711                           | X <sub>3/2</sub> | X <sub>3/2</sub> | 2      | 1       | 5.5  | 4.5   |
| 3565.672                            | 3565.6678                           | X <sub>3/2</sub> | X <sub>3/2</sub> | 1      | 0       | 2.5  | 2.5   |
| 3566.080                            | 3566.0815                           | X <sub>1/2</sub> | X <sub>1/2</sub> | 11     | 9       | 9.5  | 8.5   |
| 3568.416                            | 3568.4159                           | X <sub>3/2</sub> | X <sub>3/2</sub> | 1      | 0       | 1.5  | 1.5   |
| 3568.523                            | 3568.5228                           | X <sub>3/2</sub> | X <sub>3/2</sub> | 1      | 0       | 1.5  | 1.5   |
| 3568.909                            | 3568.9058                           | X <sub>1/2</sub> | X <sub>1/2</sub> | 1      | 0       | 0.5  | 0.5   |
| 3569.213                            | 3569.2145                           | X <sub>1/2</sub> | X <sub>1/2</sub> | 1      | 0       | 0.5  | 0.5   |
| 3571.168                            | 3571.1709                           | X <sub>1/2</sub> | X <sub>3/2</sub> | 4      | 3       | 7.5  | 6.5   |
| 3578.154                            | 3578.1589                           | X <sub>1/2</sub> | X <sub>1/2</sub> | 3      | 2       | 16.5 | 15.5  |
| 3578.672                            | 3578.6759                           | X <sub>3/2</sub> | X <sub>3/2</sub> | 3      | 2       | 17.5 | 16.5  |
| 3582.911                            | 3582.9115                           | X <sub>1/2</sub> | X <sub>3/2</sub> | 6      | 5       | 23.5 | 22.5  |
| 3586.253                            | 3586.2484                           | X <sub>3/2</sub> | X <sub>3/2</sub> | 1      | 0       | 39.5 | 38.5  |
| 3588.743                            | 3588.7436                           | X <sub>1/2</sub> | X <sub>1/2</sub> | 10     | 8       | 15.5 | 14.5  |
| 3591.748                            | 3591.7523                           | X <sub>3/2</sub> | X <sub>1/2</sub> | 2      | 0       | 41.5 | 41.5  |

Table S2: Observed and theoretically predicted rotational lines of OH in the ground and the first excited vibrational state

| $\nu_{\text{exp}} (\text{cm}^{-1})$ | $\nu_{\text{the}} (\text{cm}^{-1})$ | GUQ              | GLQ              | $\nu'$ | $\nu''$ | $J'$ | $J''$ |
|-------------------------------------|-------------------------------------|------------------|------------------|--------|---------|------|-------|
| 710.139                             | 710.1364                            | X <sub>1/2</sub> | X <sub>1/2</sub> | 0      | 0       | 20.5 | 19.5  |
| 710.774                             | 710.7714                            | X <sub>3/2</sub> | X <sub>3/2</sub> | 0      | 0       | 21.5 | 20.5  |
| 711.196                             | 711.1886                            | X <sub>1/2</sub> | X <sub>1/2</sub> | 0      | 0       | 20.5 | 19.5  |
| 712.000                             | 711.9951                            | X <sub>3/2</sub> | X <sub>3/2</sub> | 0      | 0       | 21.5 | 20.5  |
| 737.487                             | 737.4856                            | X <sub>1/2</sub> | X <sub>1/2</sub> | 0      | 0       | 21.5 | 20.5  |
| 738.052                             | 738.0500                            | X <sub>3/2</sub> | X <sub>3/2</sub> | 0      | 0       | 22.5 | 21.5  |
| 738.556                             | 738.5517                            | X <sub>1/2</sub> | X <sub>1/2</sub> | 0      | 0       | 21.5 | 20.5  |
| 739.285                             | 739.2818                            | X <sub>3/2</sub> | X <sub>3/2</sub> | 0      | 0       | 22.5 | 21.5  |
| 757.366                             | 757.3654                            | X <sub>1/2</sub> | X <sub>1/2</sub> | 1      | 1       | 23.5 | 22.5  |
| 757.838                             | 757.8394                            | X <sub>3/2</sub> | X <sub>3/2</sub> | 1      | 1       | 24.5 | 23.5  |
| 758.997                             | 758.9941                            | X <sub>3/2</sub> | X <sub>3/2</sub> | 1      | 1       | 24.5 | 23.5  |
| 763.983                             | 763.9828                            | X <sub>1/2</sub> | X <sub>1/2</sub> | 0      | 0       | 22.5 | 21.5  |
| 764.484                             | 764.4861                            | X <sub>3/2</sub> | X <sub>3/2</sub> | 0      | 0       | 23.5 | 22.5  |
| 765.058                             | 765.0580                            | X <sub>1/2</sub> | X <sub>1/2</sub> | 0      | 0       | 22.5 | 21.5  |
| 765.719                             | 765.7208                            | X <sub>3/2</sub> | X <sub>3/2</sub> | 0      | 0       | 23.5 | 22.5  |
| 780.877                             | 780.8806                            | X <sub>1/2</sub> | X <sub>1/2</sub> | 1      | 1       | 24.5 | 23.5  |
| 781.302                             | 781.3067                            | X <sub>3/2</sub> | X <sub>3/2</sub> | 1      | 1       | 25.5 | 24.5  |
| 781.889                             | 781.8884                            | X <sub>1/2</sub> | X <sub>1/2</sub> | 1      | 1       | 24.5 | 23.5  |
| 782.450                             | 782.4516                            | X <sub>3/2</sub> | X <sub>3/2</sub> | 1      | 1       | 25.5 | 24.5  |
| 789.600                             | 789.6035                            | X <sub>1/2</sub> | X <sub>1/2</sub> | 0      | 0       | 23.5 | 22.5  |
| 790.050                             | 790.0534                            | X <sub>3/2</sub> | X <sub>3/2</sub> | 0      | 0       | 24.5 | 23.5  |
| 790.680                             | 790.6827                            | X <sub>1/2</sub> | X <sub>1/2</sub> | 0      | 0       | 23.5 | 22.5  |
| 791.281                             | 791.2860                            | X <sub>3/2</sub> | X <sub>3/2</sub> | 0      | 0       | 24.5 | 23.5  |
| 803.484                             | 803.4846                            | X <sub>1/2</sub> | X <sub>1/2</sub> | 1      | 1       | 25.5 | 24.5  |
| 803.863                             | 803.8687                            | X <sub>3/2</sub> | X <sub>3/2</sub> | 1      | 1       | 26.5 | 25.5  |
| 814.319                             | 814.3239                            | X <sub>1/2</sub> | X <sub>1/2</sub> | 0      | 0       | 24.5 | 23.5  |
| 814.722                             | 814.7272                            | X <sub>3/2</sub> | X <sub>3/2</sub> | 0      | 0       | 25.5 | 24.5  |
| 815.398                             | 815.4022                            | X <sub>1/2</sub> | X <sub>1/2</sub> | 0      | 0       | 24.5 | 23.5  |
| 815.948                             | 815.9525                            | X <sub>3/2</sub> | X <sub>3/2</sub> | 0      | 0       | 25.5 | 24.5  |
| 825.147                             | 825.1554                            | X <sub>1/2</sub> | X <sub>1/2</sub> | 1      | 1       | 26.5 | 25.5  |
| 825.497                             | 825.5026                            | X <sub>3/2</sub> | X <sub>3/2</sub> | 1      | 1       | 27.5 | 26.5  |
| 826.135                             | 826.1420                            | X <sub>1/2</sub> | X <sub>1/2</sub> | 1      | 1       | 26.5 | 25.5  |
| 838.116                             | 838.1217                            | X <sub>1/2</sub> | X <sub>1/2</sub> | 0      | 0       | 25.5 | 24.5  |
| 838.480                             | 838.4842                            | X <sub>3/2</sub> | X <sub>3/2</sub> | 0      | 0       | 26.5 | 25.5  |
| 839.189                             | 839.1942                            | X <sub>1/2</sub> | X <sub>1/2</sub> | 0      | 0       | 25.5 | 24.5  |
| 839.691                             | 839.6970                            | X <sub>3/2</sub> | X <sub>3/2</sub> | 0      | 0       | 26.5 | 25.5  |
| 860.970                             | 860.9758                            | X <sub>1/2</sub> | X <sub>1/2</sub> | 0      | 0       | 26.5 | 25.5  |
| 861.298                             | 861.3024                            | X <sub>3/2</sub> | X <sub>3/2</sub> | 0      | 0       | 27.5 | 26.5  |
| 862.032                             | 862.0374                            | X <sub>1/2</sub> | X <sub>1/2</sub> | 0      | 0       | 26.5 | 25.5  |
| 862.493                             | 862.4976                            | X <sub>3/2</sub> | X <sub>3/2</sub> | 0      | 0       | 27.5 | 26.5  |
| 882.862                             | 882.8660                            | X <sub>1/2</sub> | X <sub>1/2</sub> | 0      | 0       | 27.5 | 26.5  |
| 883.157                             | 883.1610                            | X <sub>3/2</sub> | X <sub>3/2</sub> | 0      | 0       | 28.5 | 27.5  |
| 883.910                             | 883.9119                            | X <sub>1/2</sub> | X <sub>1/2</sub> | 0      | 0       | 27.5 | 26.5  |

Table S2 (continued)

| $\nu_{\text{exp}} (\text{cm}^{-1})$ | $\nu_{\text{the}} (\text{cm}^{-1})$ | GUQ       | GLQ       | $\nu'$ | $\nu''$ | $J'$ | $J''$ |
|-------------------------------------|-------------------------------------|-----------|-----------|--------|---------|------|-------|
| 884.330                             | 884.3335                            | $X_{3/2}$ | $X_{3/2}$ | 0      | 0       | 28.5 | 27.5  |
| 903.769                             | 903.7735                            | $X_{1/2}$ | $X_{1/2}$ | 0      | 0       | 28.5 | 27.5  |
| 904.036                             | 904.0406                            | $X_{3/2}$ | $X_{3/2}$ | 0      | 0       | 29.5 | 28.5  |
| 904.795                             | 904.7988                            | $X_{1/2}$ | $X_{1/2}$ | 0      | 0       | 28.5 | 27.5  |
| 905.179                             | 905.1854                            | $X_{3/2}$ | $X_{3/2}$ | 0      | 0       | 29.5 | 28.5  |
| 923.678                             | 923.6805                            | $X_{1/2}$ | $X_{1/2}$ | 0      | 0       | 29.5 | 28.5  |
| 923.919                             | 923.9230                            | $X_{3/2}$ | $X_{3/2}$ | 0      | 0       | 30.5 | 29.5  |
| 924.680                             | 924.6804                            | $X_{1/2}$ | $X_{1/2}$ | 0      | 0       | 29.5 | 28.5  |
| 925.033                             | 925.0350                            | $X_{3/2}$ | $X_{3/2}$ | 0      | 0       | 30.5 | 29.5  |
| 942.571                             | 942.5702                            | $X_{1/2}$ | $X_{1/2}$ | 0      | 0       | 30.5 | 29.5  |
| 942.788                             | 942.7908                            | $X_{3/2}$ | $X_{3/2}$ | 0      | 0       | 31.5 | 30.5  |
| 943.540                             | 943.5400                            | $X_{1/2}$ | $X_{1/2}$ | 0      | 0       | 30.5 | 29.5  |
| 943.862                             | 943.8652                            | $X_{3/2}$ | $X_{3/2}$ | 0      | 0       | 31.5 | 30.5  |
| 960.626                             | 960.6281                            | $X_{3/2}$ | $X_{3/2}$ | 0      | 0       | 32.5 | 31.5  |
| 961.651                             | 961.6600                            | $X_{3/2}$ | $X_{3/2}$ | 0      | 0       | 32.5 | 31.5  |

Table S3: Rovibrational emission lines of NH radical in the  $X^3\Sigma^-$  ground state

| $\nu_{\text{exp}} (\text{cm}^{-1})$ | $\nu_{\text{the}} (\text{cm}^{-1})$ | $\nu'$ | $\nu''$ | $J'$ | $N'$ | $J''$ | $N''$ |
|-------------------------------------|-------------------------------------|--------|---------|------|------|-------|-------|
| 2426.441                            | 2426.4392                           | 1      | 0       | 6    | 5    | 7     | 8     |
| 2613.714                            | 2613.7140                           | 1      | 0       | 13   | 12   | 13    | 13    |
| 2613.955                            | 2613.9517                           | 1      | 0       | 13   | 12   | 12    | 13    |
| 2660.131                            | 2660.1320                           | 1      | 0       | 11   | 11   | 12    | 12    |
| 2704.314                            | 2704.3094                           | 1      | 0       | 11   | 10   | 12    | 11    |
| 2730.722                            | 2730.7179                           | 1      | 0       | 3    | 2    | 4     | 5     |
| 2746.092                            | 2746.0923                           | 1      | 0       | 10   | 9    | 10    | 10    |
| 2747.407                            | 2747.4052                           | 1      | 0       | 8    | 9    | 9     | 10    |
| 2747.488                            | 2747.4922                           | 1      | 0       | 9    | 9    | 10    | 10    |
| 2790.380                            | 2790.3822                           | 1      | 0       | 8    | 8    | 8     | 9     |
| 2830.755                            | 2830.7539                           | 1      | 0       | 2    | 1    | 3     | 4     |
| 2831.956                            | 2831.9537                           | 1      | 0       | 7    | 7    | 7     | 8     |
| 2910.371                            | 2910.3732                           | 1      | 0       | 6    | 5    | 6     | 6     |
| 2912.205                            | 2912.2076                           | 1      | 0       | 5    | 5    | 5     | 6     |
| 2929.953                            | 2929.9560                           | 1      | 0       | 1    | 0    | 2     | 3     |
| 2948.966                            | 2948.9613                           | 1      | 0       | 5    | 4    | 5     | 5     |
| 2949.960                            | 2949.9660                           | 1      | 0       | 3    | 4    | 4     | 5     |
| 2987.381                            | 2987.3859                           | 1      | 0       | 2    | 3    | 3     | 4     |
| 2987.585                            | 2987.5859                           | 1      | 0       | 4    | 3    | 5     | 4     |
| 3022.865                            | 3022.8649                           | 1      | 0       | 3    | 2    | 3     | 3     |
| 3023.638                            | 3023.6333                           | 1      | 0       | 1    | 2    | 2     | 3     |
| 3023.903                            | 3023.9063                           | 1      | 0       | 3    | 2    | 4     | 3     |
| 3058.955                            | 3058.9574                           | 1      | 0       | 1    | 1    | 2     | 2     |
| 3059.064                            | 3059.0697                           | 1      | 0       | 2    | 1    | 3     | 2     |
| 3059.219                            | 3059.2203                           | 1      | 0       | 2    | 1    | 1     | 2     |
| 3092.211                            | 3092.2164                           | 1      | 0       | 1    | 0    | 1     | 1     |
| 3093.062                            | 3093.0676                           | 1      | 0       | 1    | 0    | 2     | 1     |
| 3093.995                            | 3094.0008                           | 1      | 0       | 1    | 0    | 0     | 1     |
| 3156.783                            | 3156.7860                           | 1      | 0       | 2    | 1    | 1     | 0     |
| 3157.626                            | 3157.6314                           | 1      | 0       | 1    | 1    | 1     | 0     |
| 3186.908                            | 3186.9097                           | 1      | 0       | 3    | 2    | 2     | 1     |
| 3187.009                            | 3187.0072                           | 1      | 0       | 2    | 2    | 1     | 1     |
| 3187.862                            | 3187.8585                           | 1      | 0       | 2    | 2    | 2     | 1     |
| 3214.742                            | 3214.7441                           | 1      | 0       | 2    | 3    | 2     | 2     |
| 3215.609                            | 3215.6138                           | 1      | 0       | 4    | 3    | 3     | 2     |
| 3215.685                            | 3215.6856                           | 1      | 0       | 3    | 3    | 2     | 2     |
| 3215.846                            | 3215.8524                           | 1      | 0       | 2    | 3    | 1     | 2     |
| 3242.888                            | 3242.8927                           | 1      | 0       | 5    | 4    | 4     | 3     |
| 3242.951                            | 3242.9511                           | 1      | 0       | 4    | 4    | 3     | 3     |
| 3243.044                            | 3243.0462                           | 1      | 0       | 3    | 4    | 2     | 3     |
| 3243.158                            | 3243.1544                           | 1      | 0       | 3    | 4    | 4     | 3     |
| 3268.713                            | 3268.7153                           | 1      | 0       | 6    | 5    | 5     | 4     |
| 3268.766                            | 3268.7652                           | 1      | 0       | 5    | 5    | 4     | 4     |

Table S3 (continued)

| $\nu_{\text{exp}} (\text{cm}^{-1})$ | $\nu_{\text{the}} (\text{cm}^{-1})$ | $\nu'$ | $\nu''$ | $J'$ | $N'$ | $J''$ | $N''$ |
|-------------------------------------|-------------------------------------|--------|---------|------|------|-------|-------|
| 3268.835                            | 3268.8345                           | 1      | 0       | 4    | 5    | 3     | 4     |
| 3269.880                            | 3269.8799                           | 1      | 0       | 5    | 5    | 5     | 4     |
| 3293.045                            | 3293.0463                           | 1      | 0       | 7    | 6    | 6     | 5     |
| 3293.093                            | 3293.0899                           | 1      | 0       | 6    | 6    | 5     | 5     |
| 3293.150                            | 3293.1459                           | 1      | 0       | 5    | 6    | 4     | 5     |
| 3293.587                            | 3293.5852                           | 1      | 0       | 5    | 6    | 6     | 5     |
| 3294.275                            | 3294.2723                           | 1      | 0       | 6    | 6    | 6     | 5     |
| 3316.511                            | 3316.5122                           | 1      | 0       | 6    | 7    | 7     | 6     |
| 3356.260                            | 3356.2542                           | 1      | 0       | 8    | 9    | 8     | 8     |
| 3374.306                            | 3374.3103                           | 1      | 0       | 9    | 10   | 9     | 9     |
| 3392.182                            | 3392.1828                           | 1      | 0       | 10   | 11   | 11    | 10    |
| 3405.374                            | 3405.3722                           | 1      | 0       | 11   | 12   | 11    | 11    |
| 3418.608                            | 3418.6059                           | 1      | 0       | 12   | 13   | 11    | 12    |
| 3419.911                            | 3419.9145                           | 1      | 0       | 12   | 13   | 13    | 12    |
| 3429.679                            | 3429.6822                           | 1      | 0       | 15   | 14   | 14    | 13    |
| 3438.838                            | 3438.8322                           | 1      | 0       | 14   | 15   | 14    | 14    |
| 2386.134                            | 2386.1334                           | 2      | 1       | 13   | 14   | 14    | 15    |
| 2386.399                            | 2386.3940                           | 2      | 1       | 14   | 14   | 14    | 15    |
| 2431.176                            | 2431.1783                           | 2      | 1       | 12   | 13   | 13    | 14    |
| 2431.276                            | 2431.2701                           | 2      | 1       | 13   | 13   | 14    | 14    |
| 2474.373                            | 2474.3736                           | 2      | 1       | 13   | 12   | 12    | 13    |
| 2475.713                            | 2475.7185                           | 2      | 1       | 13   | 12   | 14    | 13    |
| 2475.897                            | 2475.9000                           | 2      | 1       | 12   | 12   | 12    | 13    |
| 2493.045                            | 2493.0506                           | 2      | 1       | 4    | 3    | 5     | 6     |
| 2560.661                            | 2560.6629                           | 2      | 1       | 11   | 10   | 11    | 11    |
| 2603.170                            | 2603.1756                           | 2      | 1       | 10   | 9    | 9     | 10    |
| 2604.015                            | 2604.0180                           | 2      | 1       | 8    | 9    | 9     | 10    |
| 2604.101                            | 2604.1007                           | 2      | 1       | 9    | 9    | 10    | 10    |
| 2604.193                            | 2604.1876                           | 2      | 1       | 10   | 9    | 11    | 10    |
| 2644.432                            | 2644.4338                           | 2      | 1       | 9    | 8    | 8     | 9     |
| 2684.784                            | 2684.7809                           | 2      | 1       | 8    | 7    | 7     | 8     |
| 2725.377                            | 2725.3785                           | 2      | 1       | 6    | 6    | 6     | 7     |
| 2781.452                            | 2781.4558                           | 2      | 1       | 1    | 0    | 2     | 3     |
| 2800.338                            | 2800.3438                           | 2      | 1       | 5    | 4    | 6     | 5     |
| 2835.389                            | 2835.3923                           | 2      | 1       | 4    | 3    | 4     | 4     |
| 2836.298                            | 2836.2985                           | 2      | 1       | 2    | 3    | 3     | 4     |
| 2836.405                            | 2836.4089                           | 2      | 1       | 3    | 3    | 4     | 4     |
| 2836.490                            | 2836.4922                           | 2      | 1       | 4    | 3    | 5     | 4     |
| 2871.245                            | 2871.2509                           | 2      | 1       | 1    | 2    | 2     | 3     |
| 2904.442                            | 2904.4363                           | 2      | 1       | 2    | 1    | 2     | 2     |
| 2904.605                            | 2904.6014                           | 2      | 1       | 0    | 1    | 1     | 2     |
| 2905.271                            | 2905.2748                           | 2      | 1       | 1    | 1    | 2     | 2     |
| 2905.380                            | 2905.3851                           | 2      | 1       | 2    | 1    | 3     | 2     |



Table S3 (continued)

| $\nu_{\text{exp}} (\text{cm}^{-1})$ | $\nu_{\text{the}} (\text{cm}^{-1})$ | $\nu'$ | $\nu''$ | $J'$ | $N'$ | $J''$ | $N''$ |
|-------------------------------------|-------------------------------------|--------|---------|------|------|-------|-------|
| 2998.279                            | 2998.2787                           | 2      | 1       | 0    | 1    | 1     | 0     |
| 2999.227                            | 2999.2271                           | 2      | 1       | 2    | 1    | 1     | 0     |
| 3000.069                            | 3000.0657                           | 2      | 1       | 1    | 1    | 1     | 0     |
| 3028.057                            | 3028.0614                           | 2      | 1       | 3    | 2    | 2     | 1     |
| 3028.151                            | 3028.1548                           | 2      | 1       | 2    | 2    | 1     | 1     |
| 3028.827                            | 3028.8246                           | 2      | 1       | 1    | 2    | 0     | 1     |
| 3029.005                            | 3029.0002                           | 2      | 1       | 2    | 2    | 2     | 1     |
| 3055.473                            | 3055.4786                           | 2      | 1       | 4    | 3    | 3     | 2     |
| 3055.544                            | 3055.5462                           | 2      | 1       | 3    | 3    | 2     | 2     |
| 3055.711                            | 3055.7114                           | 2      | 1       | 2    | 3    | 1     | 2     |
| 3080.684                            | 3080.6795                           | 2      | 1       | 3    | 4    | 3     | 3     |
| 3081.526                            | 3081.5276                           | 2      | 1       | 4    | 4    | 3     | 3     |
| 3081.620                            | 3081.6210                           | 2      | 1       | 3    | 4    | 2     | 3     |
| 3081.710                            | 3081.7089                           | 2      | 1       | 3    | 4    | 4     | 3     |
| 3106.060                            | 3106.0602                           | 2      | 1       | 5    | 5    | 4     | 4     |
| 3106.130                            | 3106.1279                           | 2      | 1       | 4    | 5    | 3     | 4     |
| 3106.384                            | 3106.3896                           | 2      | 1       | 4    | 5    | 5     | 4     |
| 3107.155                            | 3107.1600                           | 2      | 1       | 5    | 5    | 5     | 4     |
| 3129.067                            | 3129.0666                           | 2      | 1       | 7    | 6    | 6     | 5     |
| 3129.108                            | 3129.1061                           | 2      | 1       | 6    | 6    | 5     | 5     |
| 3129.165                            | 3129.1604                           | 2      | 1       | 5    | 6    | 4     | 5     |
| 3129.566                            | 3129.5675                           | 2      | 1       | 5    | 6    | 6     | 5     |
| 3130.269                            | 3130.2707                           | 2      | 1       | 6    | 6    | 6     | 5     |
| 3150.599                            | 3150.5931                           | 2      | 1       | 8    | 7    | 7     | 6     |
| 3151.217                            | 3151.2121                           | 2      | 1       | 6    | 7    | 7     | 6     |
| 3170.009                            | 3170.0042                           | 2      | 1       | 7    | 8    | 7     | 7     |
| 3205.202                            | 3205.2024                           | 2      | 1       | 9    | 10   | 9     | 9     |
| 3220.307                            | 3220.3113                           | 2      | 1       | 10   | 11   | 10    | 10    |
| 3221.767                            | 3221.7671                           | 2      | 1       | 10   | 11   | 11    | 10    |
| 3233.717                            | 3233.7129                           | 2      | 1       | 11   | 12   | 11    | 11    |
| 3245.375                            | 3245.3723                           | 2      | 1       | 12   | 13   | 12    | 12    |
| 3255.502                            | 3255.5070                           | 2      | 1       | 15   | 14   | 14    | 13    |
| 3257.142                            | 3257.1363                           | 2      | 1       | 14   | 14   | 14    | 13    |
| 3410.692                            | 3410.6969                           | 2      | 1       | 5    | 6    | 4     | 3     |
| 2335.019                            | 2335.0185                           | 3      | 2       | 11   | 12   | 12    | 13    |
| 2335.108                            | 2335.1029                           | 3      | 2       | 12   | 12   | 13    | 13    |
| 2419.162                            | 2419.1672                           | 3      | 2       | 9    | 10   | 10    | 11    |
| 2419.245                            | 2419.2471                           | 3      | 2       | 10   | 10   | 11    | 11    |
| 2419.668                            | 2419.6651                           | 3      | 2       | 10   | 10   | 10    | 11    |
| 2448.896                            | 2448.8957                           | 3      | 2       | 3    | 2    | 4     | 5     |
| 2460.003                            | 2459.9970                           | 3      | 2       | 8    | 9    | 9     | 10    |
| 2460.158                            | 2460.1595                           | 3      | 2       | 10   | 9    | 11    | 10    |
| 2460.545                            | 2460.5468                           | 3      | 2       | 9    | 9    | 9     | 10    |

Table S3 (continued)

| $\nu_{\text{exp}} (\text{cm}^{-1})$ | $\nu_{\text{the}} (\text{cm}^{-1})$ | $\nu'$ | $\nu''$ | $J'$ | $N'$ | $J''$ | $N''$ |
|-------------------------------------|-------------------------------------|--------|---------|------|------|-------|-------|
| 2541.186                            | 2541.1894                           | 3      | 2       | 2    | 1    | 3     | 4     |
| 2577.716                            | 2577.7135                           | 3      | 2       | 6    | 6    | 6     | 7     |
| 2613.679                            | 2613.6794                           | 3      | 2       | 6    | 5    | 5     | 6     |
| 2649.011                            | 2649.0113                           | 3      | 2       | 5    | 4    | 5     | 5     |
| 2649.987                            | 2649.9923                           | 3      | 2       | 3    | 4    | 4     | 5     |
| 2650.152                            | 2650.1569                           | 3      | 2       | 5    | 4    | 6     | 5     |
| 2684.850                            | 2684.8539                           | 3      | 2       | 2    | 3    | 3     | 4     |
| 2717.777                            | 2717.7766                           | 3      | 2       | 3    | 2    | 3     | 3     |
| 2718.791                            | 2718.7931                           | 3      | 2       | 3    | 2    | 4     | 3     |
| 2751.273                            | 2751.2731                           | 3      | 2       | 1    | 1    | 2     | 2     |
| 2751.379                            | 2751.3811                           | 3      | 2       | 2    | 1    | 3     | 2     |
| 2782.795                            | 2782.7976                           | 3      | 2       | 1    | 0    | 2     | 1     |
| 2840.398                            | 2840.4008                           | 3      | 2       | 0    | 1    | 1     | 0     |
| 2842.184                            | 2842.1855                           | 3      | 2       | 1    | 1    | 1     | 0     |
| 2868.978                            | 2868.9761                           | 3      | 2       | 2    | 2    | 1     | 1     |
| 2894.992                            | 2894.9966                           | 3      | 2       | 4    | 3    | 3     | 2     |
| 2895.063                            | 2895.0605                           | 3      | 2       | 3    | 3    | 2     | 2     |
| 2895.222                            | 2895.2239                           | 3      | 2       | 2    | 3    | 1     | 2     |
| 2918.874                            | 2918.8732                           | 3      | 2       | 3    | 4    | 3     | 3     |
| 2919.726                            | 2919.7298                           | 3      | 2       | 4    | 4    | 3     | 3     |
| 2919.820                            | 2919.8217                           | 3      | 2       | 3    | 4    | 2     | 3     |
| 2942.159                            | 2942.1633                           | 3      | 2       | 4    | 5    | 4     | 4     |
| 2942.900                            | 2942.9031                           | 3      | 2       | 6    | 5    | 5     | 4     |
| 2942.948                            | 2942.9452                           | 3      | 2       | 5    | 5    | 4     | 4     |
| 2943.010                            | 2943.0114                           | 3      | 2       | 4    | 5    | 3     | 4     |
| 2964.634                            | 2964.6324                           | 3      | 2       | 7    | 6    | 6     | 5     |
| 2964.727                            | 2964.7212                           | 3      | 2       | 5    | 6    | 4     | 5     |
| 2984.831                            | 2984.8299                           | 3      | 2       | 8    | 7    | 7     | 6     |
| 2984.863                            | 2984.8607                           | 3      | 2       | 7    | 7    | 6     | 6     |
| 2985.022                            | 2985.0191                           | 3      | 2       | 2    | 3    | 1     | 0     |
| 3003.485                            | 3003.4845                           | 3      | 2       | 8    | 8    | 7     | 7     |
| 3004.145                            | 3004.1417                           | 3      | 2       | 7    | 8    | 8     | 7     |
| 3021.820                            | 3021.8172                           | 3      | 2       | 9    | 9    | 9     | 8     |
| 3049.557                            | 3049.5532                           | 3      | 2       | 12   | 11   | 11    | 10    |
| 3050.538                            | 3050.5434                           | 3      | 2       | 10   | 11   | 11    | 10    |
| 3061.547                            | 3061.5434                           | 3      | 2       | 12   | 12   | 11    | 11    |
| 3063.016                            | 3063.0178                           | 3      | 2       | 12   | 12   | 12    | 11    |
| 3071.775                            | 3071.7814                           | 3      | 2       | 12   | 13   | 11    | 12    |
| 3073.285                            | 3073.2902                           | 3      | 2       | 13   | 13   | 13    | 12    |
| 3081.470                            | 3081.4731                           | 3      | 2       | 13   | 14   | 14    | 13    |
| 3314.128                            | 3314.1288                           | 3      | 2       | 6    | 7    | 5     | 4     |
| 2306.418                            | 2306.4227                           | 4      | 3       | 3    | 2    | 4     | 5     |
| 2314.184                            | 2314.1859                           | 4      | 3       | 8    | 9    | 9     | 10    |

Table S3 (continued)

| $\nu_{\text{exp}} (\text{cm}^{-1})$ | $\nu_{\text{the}} (\text{cm}^{-1})$ | $\nu'$ | $\nu''$ | $J'$ | $N'$ | $J''$ | $N''$ |
|-------------------------------------|-------------------------------------|--------|---------|------|------|-------|-------|
| 2314.261                            | 2314.2588                           | 4      | 3       | 9    | 9    | 10    | 10    |
| 2352.363                            | 2352.3680                           | 4      | 3       | 9    | 8    | 8     | 9     |
| 2353.007                            | 2353.0034                           | 4      | 3       | 7    | 8    | 8     | 9     |
| 2464.352                            | 2464.3570                           | 4      | 3       | 5    | 5    | 5     | 6     |
| 2499.183                            | 2499.1822                           | 4      | 3       | 4    | 4    | 4     | 5     |
| 2532.045                            | 2532.0478                           | 4      | 3       | 3    | 3    | 4     | 4     |
| 2532.128                            | 2532.1276                           | 4      | 3       | 4    | 3    | 5     | 4     |
| 2564.627                            | 2564.6292                           | 4      | 3       | 3    | 2    | 4     | 3     |
| 2595.183                            | 2595.1847                           | 4      | 3       | 0    | 1    | 1     | 2     |
| 2625.256                            | 2625.2531                           | 4      | 3       | 1    | 0    | 1     | 1     |
| 2626.080                            | 2626.0840                           | 4      | 3       | 1    | 0    | 2     | 1     |
| 2682.858                            | 2682.8609                           | 4      | 3       | 1    | 1    | 1     | 0     |
| 2707.212                            | 2707.2111                           | 4      | 3       | 1    | 2    | 1     | 1     |
| 2708.247                            | 2708.2447                           | 4      | 3       | 3    | 2    | 2     | 1     |
| 2708.326                            | 2708.3296                           | 4      | 3       | 2    | 2    | 1     | 1     |
| 2733.009                            | 2733.0137                           | 4      | 3       | 4    | 3    | 3     | 2     |
| 2733.074                            | 2733.0729                           | 4      | 3       | 3    | 3    | 2     | 2     |
| 2733.233                            | 2733.2354                           | 4      | 3       | 2    | 3    | 1     | 2     |
| 2755.529                            | 2755.5233                           | 4      | 3       | 3    | 4    | 3     | 3     |
| 2756.337                            | 2756.3400                           | 4      | 3       | 5    | 4    | 4     | 3     |
| 2756.382                            | 2756.3860                           | 4      | 3       | 4    | 4    | 3     | 3     |
| 2756.479                            | 2756.4771                           | 4      | 3       | 3    | 4    | 2     | 3     |
| 2778.192                            | 2778.1918                           | 4      | 3       | 6    | 5    | 5     | 4     |
| 2778.229                            | 2778.2293                           | 4      | 3       | 5    | 5    | 4     | 4     |
| 2778.294                            | 2778.2948                           | 4      | 3       | 4    | 5    | 3     | 4     |
| 2799.685                            | 2799.6894                           | 4      | 3       | 6    | 6    | 6     | 5     |
| 2817.346                            | 2817.3492                           | 4      | 3       | 7    | 7    | 6     | 6     |
| 2834.549                            | 2834.5471                           | 4      | 3       | 8    | 8    | 7     | 7     |
| 2835.776                            | 2835.7819                           | 4      | 3       | 8    | 8    | 8     | 7     |
| 2876.208                            | 2876.2100                           | 4      | 3       | 12   | 11   | 11    | 10    |
| 2876.239                            | 2876.2449                           | 4      | 3       | 10   | 11   | 9     | 10    |
| 2886.671                            | 2886.6671                           | 4      | 3       | 13   | 12   | 12    | 11    |
| 2902.189                            | 2902.1900                           | 4      | 3       | 15   | 14   | 14    | 13    |
| 2903.731                            | 2903.7259                           | 4      | 3       | 14   | 14   | 14    | 13    |
| 2979.395                            | 2979.3914                           | 4      | 3       | 4    | 5    | 3     | 2     |
| 3132.334                            | 3132.3324                           | 4      | 3       | 6    | 7    | 5     | 4     |
| 3538.652                            | 3538.6484                           | 4      | 3       | 12   | 13   | 11    | 10    |
| 3597.483                            | 3597.4828                           | 4      | 3       | 13   | 14   | 12    | 11    |
| 2309.128                            | 2309.1232                           | 5      | 4       | 6    | 5    | 6     | 6     |
| 2310.136                            | 2310.1374                           | 5      | 4       | 4    | 5    | 5     | 6     |
| 2310.197                            | 2310.2029                           | 5      | 4       | 5    | 5    | 6     | 6     |
| 2343.867                            | 2343.8731                           | 5      | 4       | 5    | 4    | 6     | 5     |
| 2376.243                            | 2376.2440                           | 5      | 4       | 3    | 3    | 4     | 4     |

Table S3 (continued)

| $\nu_{\text{exp}} (\text{cm}^{-1})$ | $\nu_{\text{the}} (\text{cm}^{-1})$ | $\nu'$ | $\nu''$ | $J'$ | $N'$ | $J''$ | $N''$ |
|-------------------------------------|-------------------------------------|--------|---------|------|------|-------|-------|
| 2407.516                            | 2407.5105                           | 5      | 4       | 2    | 2    | 3     | 3     |
| 2407.597                            | 2407.5979                           | 5      | 4       | 3    | 2    | 4     | 3     |
| 2467.470                            | 2467.4677                           | 5      | 4       | 1    | 0    | 0     | 1     |
| 2518.872                            | 2518.8687                           | 5      | 4       | 0    | 1    | 1     | 0     |
| 2543.622                            | 2543.6275                           | 5      | 4       | 1    | 2    | 1     | 1     |
| 2544.450                            | 2544.4492                           | 5      | 4       | 1    | 2    | 2     | 1     |
| 2544.657                            | 2544.6614                           | 5      | 4       | 3    | 2    | 2     | 1     |
| 2544.740                            | 2544.7396                           | 5      | 4       | 2    | 2    | 1     | 1     |
| 2545.401                            | 2545.4058                           | 5      | 4       | 1    | 2    | 0     | 1     |
| 2568.038                            | 2568.0351                           | 5      | 4       | 4    | 3    | 3     | 2     |
| 2568.253                            | 2568.2519                           | 5      | 4       | 2    | 3    | 1     | 2     |
| 2589.108                            | 2589.1131                           | 5      | 4       | 3    | 4    | 3     | 3     |
| 2590.967                            | 2590.9640                           | 5      | 4       | 4    | 4    | 4     | 3     |
| 2610.362                            | 2610.3661                           | 5      | 4       | 5    | 5    | 4     | 4     |
| 2610.616                            | 2610.6196                           | 5      | 4       | 4    | 5    | 5     | 4     |
| 2628.478                            | 2628.4783                           | 5      | 4       | 5    | 6    | 5     | 5     |
| 2629.272                            | 2629.2694                           | 5      | 4       | 5    | 6    | 4     | 5     |
| 2629.588                            | 2629.5829                           | 5      | 4       | 5    | 6    | 6     | 5     |
| 2645.795                            | 2645.7992                           | 5      | 4       | 6    | 7    | 6     | 6     |
| 2646.483                            | 2646.4831                           | 5      | 4       | 7    | 7    | 6     | 6     |
| 2646.526                            | 2646.5289                           | 5      | 4       | 6    | 7    | 5     | 6     |
| 2650.205                            | 2650.2098                           | 5      | 4       | 2    | 3    | 1     | 0     |
| 2662.108                            | 2662.1132                           | 5      | 4       | 9    | 8    | 8     | 7     |
| 2662.173                            | 2662.1683                           | 5      | 4       | 7    | 8    | 6     | 7     |
| 2663.334                            | 2663.3363                           | 5      | 4       | 8    | 8    | 8     | 7     |
| 2675.524                            | 2675.5241                           | 5      | 4       | 8    | 9    | 8     | 8     |
| 2676.115                            | 2676.1108                           | 5      | 4       | 9    | 9    | 8     | 8     |
| 2676.145                            | 2676.1454                           | 5      | 4       | 8    | 9    | 7     | 8     |
| 2676.776                            | 2676.7808                           | 5      | 4       | 8    | 9    | 9     | 8     |
| 2677.371                            | 2677.3674                           | 5      | 4       | 9    | 9    | 9     | 8     |
| 2698.423                            | 2698.4225                           | 5      | 4       | 10   | 11   | 10    | 10    |
| 2698.945                            | 2698.9442                           | 5      | 4       | 10   | 11   | 9     | 10    |
| 2707.680                            | 2707.6819                           | 5      | 4       | 11   | 12   | 10    | 11    |
| 2715.609                            | 2715.6068                           | 5      | 4       | 12   | 13   | 13    | 12    |
| 2723.900                            | 2723.8988                           | 5      | 4       | 15   | 16   | 14    | 15    |
| 2727.161                            | 2727.1638                           | 5      | 4       | 3    | 4    | 2     | 1     |
| 2802.332                            | 2802.3304                           | 5      | 4       | 4    | 5    | 3     | 2     |
| 3016.314                            | 3016.3088                           | 5      | 4       | 7    | 8    | 6     | 5     |

Table S4: Emission lines of the CN radical for the  $X^2\Sigma^+$  fundamental ground state

| $\nu$ (cm <sup>-1</sup> ) | J' | J'' | $\nu'$ | $\nu''$ | $\nu$ (cm <sup>-1</sup> ) | J' | J'' | $\nu'$ | $\nu''$ |
|---------------------------|----|-----|--------|---------|---------------------------|----|-----|--------|---------|
| 1928.5855                 | 26 | 27  | 1      | 0       | 2101.2625                 | 17 | 16  | 1      | 0       |
| 1933.2020                 | 25 | 26  | 1      | 0       | 2104.3954                 | 18 | 17  | 1      | 0       |
| 1937.8149                 | 24 | 25  | 1      | 0       | 2107.4877                 | 19 | 18  | 1      | 0       |
| 1942.3878                 | 23 | 24  | 1      | 0       | 2110.5439                 | 20 | 19  | 1      | 0       |
| 1946.9344                 | 22 | 23  | 1      | 0       | 2112.5613                 | 21 | 20  | 1      | 0       |
| 1951.4403                 | 21 | 22  | 1      | 0       | 2116.5377                 | 22 | 21  | 1      | 0       |
| 1955.9139                 | 20 | 21  | 1      | 0       | 2119.4735                 | 23 | 22  | 1      | 0       |
| 1960.3640                 | 19 | 20  | 1      | 0       | 2122.3717                 | 24 | 23  | 1      | 0       |
| 1964.7830                 | 18 | 19  | 1      | 0       | 2125.2563                 | 25 | 24  | 1      | 0       |
| 1969.1610                 | 17 | 18  | 1      | 0       | 2128.1161                 | 26 | 25  | 1      | 0       |
| 1973.5134                 | 16 | 17  | 1      | 0       | 2130.8628                 | 27 | 26  | 1      | 0       |
| 1977.8299                 | 15 | 16  | 1      | 0       | 2133.5737                 | 28 | 27  | 1      | 0       |
| 1982.1188                 | 14 | 15  | 1      | 0       | 1912.3507                 | 24 | 25  | 2      | 1       |
| 1986.3719                 | 13 | 14  | 1      | 0       | 1916.8967                 | 23 | 24  | 2      | 1       |
| 1990.5944                 | 12 | 13  | 1      | 0       | 1921.4114                 | 22 | 23  | 2      | 1       |
| 1994.7822                 | 11 | 12  | 1      | 0       | 1925.8873                 | 21 | 22  | 2      | 1       |
| 1998.9378                 | 10 | 11  | 1      | 0       | 1930.3330                 | 20 | 21  | 2      | 1       |
| 2003.0601                 | 9  | 10  | 1      | 0       | 1934.7503                 | 19 | 20  | 2      | 1       |
| 2007.1483                 | 8  | 9   | 1      | 0       | 1939.1278                 | 18 | 19  | 2      | 1       |
| 2011.2042                 | 7  | 8   | 1      | 0       | 1943.4779                 | 17 | 18  | 2      | 1       |
| 2015.2257                 | 6  | 7   | 1      | 0       | 1947.7994                 | 16 | 17  | 2      | 1       |
| 2019.2137                 | 5  | 6   | 1      | 0       | 1952.0832                 | 15 | 16  | 2      | 1       |
| 2023.1678                 | 4  | 5   | 1      | 0       | 1956.3365                 | 14 | 15  | 2      | 1       |
| 2027.0870                 | 3  | 4   | 1      | 0       | 1960.5572                 | 13 | 14  | 2      | 1       |
| 2030.9735                 | 2  | 3   | 1      | 0       | 1964.7432                 | 12 | 13  | 2      | 1       |
| 2034.8172                 | 1  | 2   | 1      | 0       | 1968.8991                 | 11 | 12  | 2      | 1       |
| 2038.6415                 | 0  | 1   | 1      | 0       | 1973.0215                 | 10 | 11  | 2      | 1       |
| 2046.1731                 | 1  | 0   | 1      | 0       | 1977.1091                 | 9  | 10  | 2      | 1       |
| 2049.8840                 | 2  | 1   | 1      | 0       | 1981.1653                 | 8  | 9   | 2      | 1       |
| 2053.5619                 | 3  | 2   | 1      | 0       | 1985.1861                 | 7  | 8   | 2      | 1       |
| 2057.2034                 | 4  | 3   | 1      | 0       | 1989.1737                 | 6  | 7   | 2      | 1       |
| 2060.8098                 | 5  | 4   | 1      | 0       | 1993.1274                 | 5  | 6   | 2      | 1       |
| 2064.3806                 | 6  | 5   | 1      | 0       | 1997.0467                 | 4  | 5   | 2      | 1       |
| 2067.9153                 | 7  | 6   | 1      | 0       | 2000.9327                 | 3  | 4   | 2      | 1       |
| 2071.4142                 | 8  | 7   | 1      | 0       | 2004.7752                 | 2  | 3   | 2      | 1       |
| 2074.8768                 | 9  | 8   | 1      | 0       | 2008.6006                 | 1  | 2   | 2      | 1       |
| 2078.3038                 | 10 | 9   | 1      | 0       | 2012.3840                 | 0  | 1   | 2      | 1       |
| 2081.6943                 | 11 | 10  | 1      | 0       | 2019.8438                 | 1  | 0   | 2      | 1       |
| 2085.0476                 | 12 | 11  | 1      | 0       | 2023.5209                 | 2  | 1   | 2      | 1       |
| 2088.3645                 | 13 | 12  | 1      | 0       | 2027.1632                 | 3  | 2   | 2      | 1       |
| 2091.6447                 | 14 | 13  | 1      | 0       | 2030.7691                 | 4  | 3   | 2      | 1       |
| 2094.8878                 | 15 | 14  | 1      | 0       | 2034.3397                 | 5  | 4   | 2      | 1       |
| 2098.0937                 | 16 | 15  | 1      | 0       | 2037.8752                 | 6  | 5   | 2      | 1       |

Table S4 (continued)

| $\nu$ (cm <sup>-1</sup> ) | J' | J'' | $\nu'$ | $\nu''$ | $\nu$ (cm <sup>-1</sup> ) | J' | J'' | $\nu'$ | $\nu''$ |
|---------------------------|----|-----|--------|---------|---------------------------|----|-----|--------|---------|
| 2041.3746                 | 7  | 6   | 2      | 1       | 1993.4751                 | 1  | 0   | 3      | 2       |
| 2044.8378                 | 8  | 7   | 2      | 1       | 1997.1204                 | 2  | 1   | 3      | 2       |
| 2048.2649                 | 9  | 8   | 2      | 1       | 2000.7248                 | 3  | 2   | 3      | 2       |
| 2051.6558                 | 10 | 9   | 2      | 1       | 2004.2952                 | 4  | 3   | 3      | 2       |
| 2055.0098                 | 11 | 10  | 2      | 1       | 2007.8314                 | 5  | 4   | 3      | 2       |
| 2058.3277                 | 12 | 11  | 2      | 1       | 2011.3309                 | 6  | 5   | 3      | 2       |
| 2061.6090                 | 13 | 12  | 2      | 1       | 2014.7942                 | 7  | 6   | 3      | 2       |
| 2064.8485                 | 14 | 13  | 2      | 1       | 2018.2215                 | 8  | 7   | 3      | 2       |
| 2068.0587                 | 15 | 14  | 2      | 1       | 2021.6128                 | 9  | 8   | 3      | 2       |
| 2071.2298                 | 16 | 15  | 2      | 1       | 2024.9676                 | 10 | 9   | 3      | 2       |
| 2074.3594                 | 17 | 16  | 2      | 1       | 2028.2849                 | 11 | 10  | 3      | 2       |
| 2077.4544                 | 18 | 17  | 2      | 1       | 2031.5668                 | 12 | 11  | 3      | 2       |
| 2080.5117                 | 19 | 18  | 2      | 1       | 2034.8172                 | 13 | 12  | 3      | 2       |
| 2083.5320                 | 20 | 19  | 2      | 1       | 2038.0184                 | 14 | 13  | 3      | 2       |
| 2086.5050                 | 21 | 20  | 2      | 1       | 2041.1879                 | 15 | 14  | 3      | 2       |
| 2089.4503                 | 22 | 21  | 2      | 1       | 2044.3201                 | 16 | 15  | 3      | 2       |
| 2092.3576                 | 23 | 22  | 2      | 1       | 2047.4164                 | 17 | 16  | 3      | 2       |
| 2095.2542                 | 24 | 23  | 2      | 1       | 2050.4704                 | 18 | 17  | 3      | 2       |
| 2098.0491                 | 25 | 24  | 2      | 1       | 2053.4899                 | 19 | 18  | 3      | 2       |
| 2100.8117                 | 26 | 25  | 2      | 1       | 2056.4728                 | 20 | 19  | 3      | 2       |
| 2103.5892                 | 27 | 26  | 2      | 1       | 2059.4119                 | 21 | 20  | 3      | 2       |
| 2106.2607                 | 28 | 27  | 2      | 1       | 2062.3248                 | 22 | 21  | 3      | 2       |
| 2108.9338                 | 29 | 28  | 2      | 1       | 2065.1719                 | 23 | 22  | 3      | 2       |
| 2111.5424                 | 30 | 29  | 2      | 1       | 2068.0104                 | 24 | 23  | 3      | 2       |
| 2114.2053                 | 31 | 30  | 2      | 1       | 2070.7981                 | 25 | 24  | 3      | 2       |
| 1913.4396                 | 18 | 19  | 3      | 2       | 2073.5051                 | 26 | 25  | 3      | 2       |
| 1917.7724                 | 17 | 18  | 3      | 2       | 2076.2609                 | 27 | 26  | 3      | 2       |
| 1922.0434                 | 16 | 17  | 3      | 2       | 2078.9582                 | 28 | 27  | 3      | 2       |
| 1926.2969                 | 15 | 16  | 3      | 2       | 2081.5644                 | 29 | 28  | 3      | 2       |
| 1930.5166                 | 14 | 15  | 3      | 2       | 2084.1264                 | 30 | 29  | 3      | 2       |
| 1938.8586                 | 12 | 13  | 3      | 2       | 1879.0565                 | 20 | 21  | 4      | 3       |
| 1942.9789                 | 11 | 12  | 3      | 2       | 1883.3974                 | 19 | 20  | 4      | 3       |
| 1947.0669                 | 10 | 11  | 3      | 2       | 1887.6986                 | 18 | 19  | 4      | 3       |
| 1951.1218                 | 9  | 10  | 3      | 2       | 1891.9962                 | 17 | 18  | 4      | 3       |
| 1955.1433                 | 8  | 9   | 3      | 2       | 1896.2530                 | 16 | 17  | 4      | 3       |
| 1959.1301                 | 7  | 8   | 3      | 2       | 1900.4697                 | 15 | 16  | 4      | 3       |
| 1963.0831                 | 6  | 7   | 3      | 2       | 1904.6590                 | 14 | 15  | 4      | 3       |
| 1967.0031                 | 5  | 6   | 3      | 2       | 1908.8107                 | 13 | 14  | 4      | 3       |
| 1970.8884                 | 4  | 5   | 3      | 2       | 1912.9321                 | 12 | 13  | 4      | 3       |
| 1974.7401                 | 3  | 4   | 3      | 2       | 1917.0201                 | 11 | 12  | 4      | 3       |
| 1978.5553                 | 2  | 3   | 3      | 2       | 1921.0744                 | 10 | 11  | 4      | 3       |
| 1982.3364                 | 1  | 2   | 3      | 2       | 1925.0944                 | 9  | 10  | 4      | 3       |
| 1986.0849                 | 0  | 1   | 3      | 2       | 1933.0352                 | 7  | 8   | 4      | 3       |

Table S4 (continued)

| $\nu$ (cm <sup>-1</sup> ) | J' | J'' | $\nu'$ | $\nu''$ | $\nu$ (cm <sup>-1</sup> ) | J' | J'' | $\nu'$ | $\nu''$ |
|---------------------------|----|-----|--------|---------|---------------------------|----|-----|--------|---------|
| 1936.9546                 | 6  | 7   | 4      | 3       | 1891.0186                 | 11 | 12  | 5      | 4       |
| 1940.8393                 | 5  | 6   | 4      | 3       | 1895.0415                 | 10 | 11  | 5      | 4       |
| 1944.6911                 | 4  | 5   | 4      | 3       | 1899.0268                 | 9  | 10  | 5      | 4       |
| 1948.5072                 | 3  | 4   | 4      | 3       | 1902.9792                 | 8  | 9   | 5      | 4       |
| 1952.2885                 | 2  | 3   | 4      | 3       | 1906.8983                 | 7  | 8   | 5      | 4       |
| 1956.0374                 | 1  | 2   | 4      | 3       | 1910.7842                 | 6  | 7   | 5      | 4       |
| 1959.7519                 | 0  | 1   | 4      | 3       | 1914.6344                 | 5  | 6   | 5      | 4       |
| 1967.0700                 | 1  | 0   | 4      | 3       | 1918.4500                 | 4  | 5   | 5      | 4       |
| 1970.6745                 | 2  | 1   | 4      | 3       | 1922.2334                 | 3  | 4   | 5      | 4       |
| 1974.2471                 | 3  | 2   | 4      | 3       | 1925.9797                 | 2  | 3   | 5      | 4       |
| 1977.7820                 | 4  | 3   | 4      | 3       | 1929.6927                 | 1  | 2   | 5      | 4       |
| 1981.2823                 | 5  | 4   | 4      | 3       | 1933.3707                 | 0  | 1   | 5      | 4       |
| 1984.7451                 | 6  | 5   | 4      | 3       | 1940.6144                 | 1  | 0   | 5      | 4       |
| 1988.1732                 | 7  | 6   | 4      | 3       | 1944.1887                 | 2  | 1   | 5      | 4       |
| 1991.5644                 | 8  | 7   | 4      | 3       | 1947.7257                 | 3  | 2   | 5      | 4       |
| 1994.9192                 | 9  | 8   | 4      | 3       | 1951.2274                 | 4  | 3   | 5      | 4       |
| 1998.2386                 | 10 | 9   | 4      | 3       | 1954.6896                 | 5  | 4   | 5      | 4       |
| 2001.5185                 | 11 | 10  | 4      | 3       | 1958.1176                 | 6  | 5   | 5      | 4       |
| 2004.7751                 | 12 | 11  | 4      | 3       | 1961.5093                 | 7  | 6   | 5      | 4       |
| 2007.9730                 | 13 | 12  | 4      | 3       | 1964.8646                 | 8  | 7   | 5      | 4       |
| 2011.1463                 | 14 | 13  | 4      | 3       | 1968.1830                 | 9  | 8   | 5      | 4       |
| 2014.2751                 | 15 | 14  | 4      | 3       | 1971.4660                 | 10 | 9   | 5      | 4       |
| 2017.3701                 | 16 | 15  | 4      | 3       | 1974.7401                 | 11 | 10  | 5      | 4       |
| 2020.4280                 | 17 | 16  | 4      | 3       | 1977.9176                 | 12 | 11  | 5      | 4       |
| 2023.4488                 | 18 | 17  | 4      | 3       | 1981.0874                 | 13 | 12  | 5      | 4       |
| 2026.4283                 | 19 | 18  | 4      | 3       | 1984.2228                 | 14 | 13  | 5      | 4       |
| 2029.3747                 | 20 | 19  | 4      | 3       | 1987.3204                 | 15 | 14  | 5      | 4       |
| 2032.2860                 | 21 | 20  | 4      | 3       | 1990.3789                 | 16 | 15  | 5      | 4       |
| 2035.1494                 | 22 | 21  | 4      | 3       | 1993.3984                 | 17 | 16  | 5      | 4       |
| 2037.9720                 | 23 | 22  | 4      | 3       | 1996.3794                 | 18 | 17  | 5      | 4       |
| 2040.7559                 | 24 | 23  | 4      | 3       | 1999.3226                 | 19 | 18  | 5      | 4       |
| 2043.5171                 | 25 | 24  | 4      | 3       | 2002.2282                 | 20 | 19  | 5      | 4       |
| 2046.2237                 | 26 | 25  | 4      | 3       | 2005.1024                 | 21 | 20  | 5      | 4       |
| 2048.8977                 | 27 | 26  | 4      | 3       | 2007.9237                 | 22 | 21  | 5      | 4       |
| 1853.3519                 | 20 | 21  | 5      | 4       | 2010.7229                 | 23 | 22  | 5      | 4       |
| 1857.6627                 | 19 | 20  | 5      | 4       | 2013.4075                 | 24 | 23  | 5      | 4       |
| 1861.9471                 | 18 | 19  | 5      | 4       | 2016.1979                 | 25 | 24  | 5      | 4       |
| 1866.2023                 | 17 | 18  | 5      | 4       | 2018.8718                 | 26 | 25  | 5      | 4       |
| 1870.4164                 | 16 | 17  | 5      | 4       | 1844.5397                 | 16 | 17  | 6      | 5       |
| 1874.5996                 | 15 | 16  | 5      | 4       | 1848.6991                 | 15 | 16  | 6      | 5       |
| 1878.7577                 | 14 | 15  | 5      | 4       | 1852.8143                 | 14 | 15  | 6      | 5       |
| 1882.8797                 | 13 | 14  | 5      | 4       | 1856.9055                 | 13 | 14  | 6      | 5       |
| 1886.9652                 | 12 | 13  | 5      | 4       | 1860.9559                 | 12 | 13  | 6      | 5       |

Table S4 (continued)

| $\nu$ (cm <sup>-1</sup> ) | J' | J'' | $\nu'$ | $\nu''$ | $\nu$ (cm <sup>-1</sup> ) | J' | J'' | $\nu'$ | $\nu''$ |
|---------------------------|----|-----|--------|---------|---------------------------|----|-----|--------|---------|
| 1864.9779                 | 11 | 12  | 6      | 5       | 1865.8429                 | 4  | 5   | 7      | 6       |
| 1872.9162                 | 9  | 10  | 6      | 5       | 1869.5497                 | 3  | 4   | 7      | 6       |
| 1876.8354                 | 8  | 9   | 6      | 5       | 1873.2297                 | 2  | 3   | 7      | 6       |
| 1880.7213                 | 7  | 8   | 6      | 5       | 1876.8761                 | 1  | 2   | 7      | 6       |
| 1884.5728                 | 6  | 7   | 6      | 5       | 1887.5802                 | 1  | 0   | 7      | 6       |
| 1888.3869                 | 5  | 6   | 6      | 5       | 1891.0880                 | 2  | 1   | 7      | 6       |
| 1892.1679                 | 4  | 5   | 6      | 5       | 1894.5505                 | 3  | 2   | 7      | 6       |
| 1895.9158                 | 3  | 4   | 6      | 5       | 1897.9789                 | 4  | 3   | 7      | 6       |
| 1899.6268                 | 2  | 3   | 6      | 5       | 1901.3698                 | 5  | 4   | 7      | 6       |
| 1903.3036                 | 1  | 2   | 6      | 5       | 1904.7246                 | 6  | 5   | 7      | 6       |
| 1906.9448                 | 0  | 1   | 6      | 5       | 1908.0437                 | 7  | 6   | 7      | 6       |
| 1914.1238                 | 1  | 0   | 6      | 5       | 1911.3281                 | 8  | 7   | 7      | 6       |
| 1917.6601                 | 2  | 1   | 6      | 5       | 1914.5755                 | 9  | 8   | 7      | 6       |
| 1921.1622                 | 3  | 2   | 6      | 5       | 1917.7724                 | 10 | 9   | 7      | 6       |
| 1924.6259                 | 4  | 3   | 6      | 5       | 1920.9524                 | 11 | 10  | 7      | 6       |
| 1928.0538                 | 5  | 4   | 6      | 5       | 1924.0855                 | 12 | 11  | 7      | 6       |
| 1931.4453                 | 6  | 5   | 6      | 5       | 1927.1844                 | 13 | 12  | 7      | 6       |
| 1934.8021                 | 7  | 6   | 6      | 5       | 1930.2394                 | 14 | 13  | 7      | 6       |
| 1938.1189                 | 8  | 7   | 6      | 5       | 1933.2620                 | 15 | 14  | 7      | 6       |
| 1941.4018                 | 9  | 8   | 6      | 5       | 1936.2485                 | 16 | 15  | 7      | 6       |
| 1947.8548                 | 11 | 10  | 6      | 5       | 1939.1858                 | 17 | 16  | 7      | 6       |
| 1951.0282                 | 12 | 11  | 6      | 5       | 1942.1069                 | 18 | 17  | 7      | 6       |
| 1954.1597                 | 13 | 12  | 6      | 5       | 1944.9719                 | 19 | 18  | 7      | 6       |
| 1957.2567                 | 14 | 13  | 6      | 5       | 1947.7994                 | 20 | 19  | 7      | 6       |
| 1960.3161                 | 15 | 14  | 6      | 5       | 1950.5953                 | 21 | 20  | 7      | 6       |
| 1963.3356                 | 16 | 15  | 6      | 5       | 1816.6909                 | 10 | 11  | 8      | 7       |
| 1966.3226                 | 17 | 16  | 6      | 5       | 1820.5594                 | 9  | 10  | 8      | 7       |
| 1972.1678                 | 19 | 18  | 6      | 5       | 1824.4058                 | 8  | 9   | 8      | 7       |
| 1975.0354                 | 20 | 19  | 6      | 5       | 1828.2782                 | 7  | 8   | 8      | 7       |
| 1977.8728                 | 21 | 20  | 6      | 5       | 1832.0105                 | 6  | 7   | 8      | 7       |
| 1980.6772                 | 22 | 21  | 6      | 5       | 1835.7451                 | 5  | 6   | 8      | 7       |
| 1983.4130                 | 23 | 22  | 6      | 5       | 1839.4649                 | 4  | 5   | 8      | 7       |
| 1986.1304                 | 24 | 23  | 6      | 5       | 1843.1407                 | 3  | 4   | 8      | 7       |
| 1988.8102                 | 25 | 24  | 6      | 5       | 1846.7576                 | 2  | 3   | 8      | 7       |
| 1830.8573                 | 13 | 14  | 7      | 6       | 1850.3724                 | 1  | 2   | 8      | 7       |
| 1834.9072                 | 12 | 13  | 7      | 6       | 1853.9552                 | 0  | 1   | 8      | 7       |
| 1838.8903                 | 11 | 12  | 7      | 6       | 1860.9559                 | 1  | 0   | 8      | 7       |
| 1842.8405                 | 10 | 11  | 7      | 6       | 1864.4642                 | 2  | 1   | 8      | 7       |
| 1846.7576                 | 9  | 10  | 7      | 6       | 1867.8652                 | 3  | 2   | 8      | 7       |
| 1850.6460                 | 8  | 9   | 7      | 6       | 1871.2807                 | 4  | 3   | 8      | 7       |
| 1854.4941                 | 7  | 8   | 7      | 6       | 1874.6404                 | 5  | 4   | 8      | 7       |
| 1858.3114                 | 6  | 7   | 7      | 6       | 1877.9579                 | 6  | 5   | 8      | 7       |
| 1862.0958                 | 5  | 6   | 7      | 6       | 1881.2390                 | 7  | 6   | 8      | 7       |



Table S4 (continued)

| $\nu$ (cm <sup>-1</sup> ) | J' | J'' | $\nu'$ | $\nu''$ |
|---------------------------|----|-----|--------|---------|
| 1884.4849                 | 8  | 7   | 8      | 7       |
| 1887.6986                 | 9  | 8   | 8      | 7       |
| 1890.8615                 | 10 | 9   | 8      | 7       |
| 1893.9942                 | 11 | 10  | 8      | 7       |
| 1897.0903                 | 12 | 11  | 8      | 7       |
| 1900.1581                 | 13 | 12  | 8      | 7       |
| 1903.1714                 | 14 | 13  | 8      | 7       |
| 1906.1642                 | 15 | 14  | 8      | 7       |
| 1909.1000                 | 16 | 15  | 8      | 7       |
| 1912.0119                 | 17 | 16  | 8      | 7       |
| 1914.8826                 | 18 | 17  | 8      | 7       |

Table S5: Emission lines of the CN radical for  $\Delta v = -3$  of the  $A^2\Pi \rightarrow X^2\Sigma^+$  transition

| $\nu$ (cm <sup>-1</sup> ) | J'   | J''  | $\nu'$ | $\nu''$ | branch | $\nu$ (cm <sup>-1</sup> ) | J'   | J''  | $\nu'$ | $\nu''$ | branch |
|---------------------------|------|------|--------|---------|--------|---------------------------|------|------|--------|---------|--------|
| 3091.324                  | 1.5  | 1.5  | 0      | 3       | Q22    | 2986.156                  | 23.5 | 23.5 | 0      | 3       | Q11    |
| 3089.093                  | 2.5  | 2.5  | 0      | 3       | Q22    | 2980.150                  | 24.5 | 24.5 | 0      | 3       | Q11    |
| 3086.689                  | 3.5  | 3.5  | 0      | 3       | Q22    | 3034.942                  | 1.5  | 2.5  | 0      | 3       | P11    |
| 3084.118                  | 4.5  | 4.5  | 0      | 3       | Q22    | 3029.051                  | 3.5  | 4.5  | 0      | 3       | P11    |
| 3081.379                  | 5.5  | 5.5  | 0      | 3       | Q22    | 3025.579                  | 4.5  | 5.5  | 0      | 3       | P11    |
| 3078.463                  | 6.5  | 6.5  | 0      | 3       | Q22    | 3021.748                  | 5.5  | 6.5  | 0      | 3       | P11    |
| 3075.367                  | 7.5  | 7.5  | 0      | 3       | Q22    | 3017.571                  | 6.5  | 7.5  | 0      | 3       | P11    |
| 3072.083                  | 8.5  | 8.5  | 0      | 3       | Q22    | 3013.038                  | 7.5  | 8.5  | 0      | 3       | P11    |
| 3068.609                  | 9.5  | 9.5  | 0      | 3       | Q22    | 3008.182                  | 8.5  | 9.5  | 0      | 3       | P11    |
| 3064.938                  | 10.5 | 10.5 | 0      | 3       | Q22    | 3002.988                  | 9.5  | 10.5 | 0      | 3       | P11    |
| 3061.063                  | 11.5 | 11.5 | 0      | 3       | Q22    | 2997.465                  | 10.5 | 11.5 | 0      | 3       | P11    |
| 3056.982                  | 12.5 | 12.5 | 0      | 3       | Q22    | 2991.621                  | 11.5 | 12.5 | 0      | 3       | P11    |
| 3052.692                  | 13.5 | 13.5 | 0      | 3       | Q22    | 2985.463                  | 12.5 | 13.5 | 0      | 3       | P11    |
| 3048.178                  | 14.5 | 14.5 | 0      | 3       | Q22    | 2978.992                  | 13.5 | 14.5 | 0      | 3       | P11    |
| 3043.456                  | 15.5 | 15.5 | 0      | 3       | Q22    | 2972.218                  | 14.5 | 15.5 | 0      | 3       | P11    |
| 3038.498                  | 16.5 | 16.5 | 0      | 3       | Q22    | 2957.769                  | 16.5 | 17.5 | 0      | 3       | P11    |
| 3033.326                  | 17.5 | 17.5 | 0      | 3       | Q22    | 2950.093                  | 17.5 | 18.5 | 0      | 3       | P11    |
| 3027.914                  | 18.5 | 18.5 | 0      | 3       | Q22    | 2942.125                  | 18.5 | 19.5 | 0      | 3       | P11    |
| 3022.273                  | 19.5 | 19.5 | 0      | 3       | Q22    | 2933.869                  | 19.5 | 20.5 | 0      | 3       | P11    |
| 3016.400                  | 20.5 | 20.5 | 0      | 3       | Q22    | 3049.110                  | 6.5  | 7.5  | 0      | 3       | P22    |
| 3010.287                  | 21.5 | 21.5 | 0      | 3       | Q22    | 3042.345                  | 7.5  | 8.5  | 0      | 3       | P22    |
| 3003.938                  | 22.5 | 22.5 | 0      | 3       | Q22    | 3035.386                  | 8.5  | 9.5  | 0      | 3       | P22    |
| 3042.300                  | 1.5  | 1.5  | 0      | 3       | Q11    | 3028.248                  | 9.5  | 10.5 | 0      | 3       | P22    |
| 3043.211                  | 2.5  | 2.5  | 0      | 3       | Q11    | 3020.909                  | 10.5 | 11.5 | 0      | 3       | P22    |
| 3043.970                  | 4.5  | 4.5  | 0      | 3       | Q11    | 3013.366                  | 11.5 | 12.5 | 0      | 3       | P22    |
| 3043.820                  | 5.5  | 5.5  | 0      | 3       | Q11    | 3005.620                  | 12.5 | 13.5 | 0      | 3       | P22    |
| 3043.309                  | 6.5  | 6.5  | 0      | 3       | Q11    | 2997.666                  | 13.5 | 14.5 | 0      | 3       | P22    |
| 3042.466                  | 7.5  | 7.5  | 0      | 3       | Q11    | 2989.492                  | 14.5 | 15.5 | 0      | 3       | P22    |
| 3041.279                  | 8.5  | 8.5  | 0      | 3       | Q11    | 2981.099                  | 15.5 | 16.5 | 0      | 3       | P22    |
| 3039.765                  | 9.5  | 9.5  | 0      | 3       | Q11    | 2963.643                  | 17.5 | 18.5 | 0      | 3       | P22    |
| 3037.913                  | 10.5 | 10.5 | 0      | 3       | Q11    | 2954.589                  | 18.5 | 19.5 | 0      | 3       | P22    |
| 3035.750                  | 11.5 | 11.5 | 0      | 3       | Q11    | 2945.295                  | 19.5 | 20.5 | 0      | 3       | P22    |
| 3033.266                  | 12.5 | 12.5 | 0      | 3       | Q11    | 2935.772                  | 20.5 | 21.5 | 0      | 3       | P22    |
| 3030.469                  | 13.5 | 13.5 | 0      | 3       | Q11    | 2926.016                  | 21.5 | 22.5 | 0      | 3       | P22    |
| 3027.364                  | 14.5 | 14.5 | 0      | 3       | Q11    | 3050.577                  | 2.5  | 1.5  | 0      | 3       | R11    |
| 3023.958                  | 15.5 | 15.5 | 0      | 3       | Q11    | 3054.808                  | 3.5  | 2.5  | 0      | 3       | R11    |
| 3020.252                  | 16.5 | 16.5 | 0      | 3       | Q11    | 3058.678                  | 4.5  | 3.5  | 0      | 3       | R11    |
| 3016.247                  | 17.5 | 17.5 | 0      | 3       | Q11    | 3062.195                  | 5.5  | 4.5  | 0      | 3       | R11    |
| 3011.951                  | 18.5 | 18.5 | 0      | 3       | Q11    | 3065.367                  | 6.5  | 5.5  | 0      | 3       | R11    |
| 3007.361                  | 19.5 | 19.5 | 0      | 3       | Q11    | 3068.187                  | 7.5  | 6.5  | 0      | 3       | R11    |
| 3002.490                  | 20.5 | 20.5 | 0      | 3       | Q11    | 3070.670                  | 8.5  | 7.5  | 0      | 3       | R11    |
| 2997.317                  | 21.5 | 21.5 | 0      | 3       | Q11    | 3072.817                  | 9.5  | 8.5  | 0      | 3       | R11    |
| 2991.882                  | 22.5 | 22.5 | 0      | 3       | Q11    | 3074.633                  | 10.5 | 9.5  | 0      | 3       | R11    |

Table S5 (continued)

| $\nu$ (cm <sup>-1</sup> ) | J'   | J''  | $\nu'$ | $\nu''$ | branch | $\nu$ (cm <sup>-1</sup> ) | J'   | J''  | $\nu'$ | $\nu''$ | branch |
|---------------------------|------|------|--------|---------|--------|---------------------------|------|------|--------|---------|--------|
| 3076.129                  | 11.5 | 10.5 | 0      | 3       | R11    | 2902.018                  | 13.5 | 12.5 | 1      | 4       | R11    |
| 3077.302                  | 12.5 | 11.5 | 0      | 3       | R11    | 2902.542                  | 14.5 | 13.5 | 1      | 4       | R11    |
| 3078.161                  | 13.5 | 12.5 | 0      | 3       | R11    | 2902.754                  | 15.5 | 14.5 | 1      | 4       | R11    |
| 3078.707                  | 14.5 | 13.5 | 0      | 3       | R11    | 2902.664                  | 16.5 | 15.5 | 1      | 4       | R11    |
| 3078.946                  | 15.5 | 14.5 | 0      | 3       | R11    | 2902.282                  | 17.5 | 16.5 | 1      | 4       | R11    |
| 3078.884                  | 16.5 | 15.5 | 0      | 3       | R11    | 2901.598                  | 18.5 | 17.5 | 1      | 4       | R11    |
| 3078.527                  | 17.5 | 16.5 | 0      | 3       | R11    | 2900.626                  | 19.5 | 18.5 | 1      | 4       | R11    |
| 3077.862                  | 18.5 | 17.5 | 0      | 3       | R11    | 2899.362                  | 20.5 | 19.5 | 1      | 4       | R11    |
| 3076.913                  | 19.5 | 18.5 | 0      | 3       | R11    | 2897.800                  | 21.5 | 20.5 | 1      | 4       | R11    |
| 3075.666                  | 20.5 | 19.5 | 0      | 3       | R11    | 2895.955                  | 22.5 | 21.5 | 1      | 4       | R11    |
| 3074.128                  | 21.5 | 20.5 | 0      | 3       | R11    | 2893.827                  | 23.5 | 22.5 | 1      | 4       | R11    |
| 3072.309                  | 22.5 | 21.5 | 0      | 3       | R11    | 2891.419                  | 24.5 | 23.5 | 1      | 4       | R11    |
| 3070.202                  | 23.5 | 22.5 | 0      | 3       | R11    | 2888.733                  | 25.5 | 24.5 | 1      | 4       | R11    |
| 3067.815                  | 24.5 | 23.5 | 0      | 3       | R11    | 2926.689                  | 4.5  | 3.5  | 1      | 4       | R22    |
| 3065.141                  | 25.5 | 24.5 | 0      | 3       | R11    | 2927.599                  | 5.5  | 4.5  | 1      | 4       | R22    |
| 3101.430                  | 3.5  | 2.5  | 0      | 3       | R22    | 2928.337                  | 6.5  | 5.5  | 1      | 4       | R22    |
| 3102.540                  | 4.5  | 3.5  | 0      | 3       | R22    | 2928.898                  | 7.5  | 6.5  | 1      | 4       | R22    |
| 3103.470                  | 5.5  | 4.5  | 0      | 3       | R22    | 2929.258                  | 8.5  | 7.5  | 1      | 4       | R22    |
| 3104.238                  | 6.5  | 5.5  | 0      | 3       | R22    | 2929.434                  | 9.5  | 8.5  | 1      | 4       | R22    |
| 3104.819                  | 7.5  | 6.5  | 0      | 3       | R22    | 2929.397                  | 10.5 | 9.5  | 1      | 4       | R22    |
| 3105.201                  | 11.5 | 10.5 | 0      | 3       | R22    | 2929.161                  | 11.5 | 10.5 | 1      | 4       | R22    |
| 3104.770                  | 12.5 | 11.5 | 0      | 3       | R22    | 2928.723                  | 12.5 | 11.5 | 1      | 4       | R22    |
| 3104.142                  | 13.5 | 12.5 | 0      | 3       | R22    | 2928.063                  | 13.5 | 12.5 | 1      | 4       | R22    |
| 3103.283                  | 14.5 | 13.5 | 0      | 3       | R22    | 2927.184                  | 14.5 | 13.5 | 1      | 4       | R22    |
| 3102.213                  | 15.5 | 14.5 | 0      | 3       | R22    | 2926.084                  | 15.5 | 14.5 | 1      | 4       | R22    |
| 3100.913                  | 16.5 | 15.5 | 0      | 3       | R22    | 2924.759                  | 16.5 | 15.5 | 1      | 4       | R22    |
| 3099.375                  | 17.5 | 16.5 | 0      | 3       | R22    | 2923.200                  | 17.5 | 16.5 | 1      | 4       | R22    |
| 3097.607                  | 18.5 | 17.5 | 0      | 3       | R22    | 2921.417                  | 18.5 | 17.5 | 1      | 4       | R22    |
| 3095.614                  | 19.5 | 18.5 | 0      | 3       | R22    | 2919.389                  | 19.5 | 18.5 | 1      | 4       | R22    |
| 3090.891                  | 21.5 | 20.5 | 0      | 3       | R22    | 2914.622                  | 21.5 | 20.5 | 1      | 4       | R22    |
| 3088.177                  | 22.5 | 21.5 | 0      | 3       | R22    | 2911.883                  | 22.5 | 21.5 | 1      | 4       | R22    |
| 2870.266                  | 1.5  | 0.5  | 1      | 4       | R11    | 2908.886                  | 23.5 | 22.5 | 1      | 4       | R22    |
| 2874.817                  | 2.5  | 1.5  | 1      | 4       | R11    | 2917.673                  | 0.5  | 0.5  | 1      | 4       | Q22    |
| 2879.011                  | 3.5  | 2.5  | 1      | 4       | R11    | 2915.611                  | 1.5  | 1.5  | 1      | 4       | Q22    |
| 2882.834                  | 4.5  | 3.5  | 1      | 4       | R11    | 2913.391                  | 2.5  | 2.5  | 1      | 4       | Q22    |
| 2886.318                  | 5.5  | 4.5  | 1      | 4       | R11    | 2911.003                  | 3.5  | 3.5  | 1      | 4       | Q22    |
| 2889.449                  | 6.5  | 5.5  | 1      | 4       | R11    | 2908.444                  | 4.5  | 4.5  | 1      | 4       | Q22    |
| 2892.234                  | 7.5  | 6.5  | 1      | 4       | R11    | 2905.718                  | 5.5  | 5.5  | 1      | 4       | Q22    |
| 2894.682                  | 8.5  | 7.5  | 1      | 4       | R11    | 2902.815                  | 6.5  | 6.5  | 1      | 4       | Q22    |
| 2896.797                  | 9.5  | 8.5  | 1      | 4       | R11    | 2899.724                  | 7.5  | 7.5  | 1      | 4       | Q22    |
| 2898.583                  | 10.5 | 9.5  | 1      | 4       | R11    | 2896.452                  | 8.5  | 8.5  | 1      | 4       | Q22    |
| 2900.047                  | 11.5 | 10.5 | 1      | 4       | R11    | 2892.986                  | 9.5  | 9.5  | 1      | 4       | Q22    |
| 2901.189                  | 12.5 | 11.5 | 1      | 4       | R11    | 2889.323                  | 10.5 | 10.5 | 1      | 4       | Q22    |

Table S5 (continued)

| $\nu$ (cm <sup>-1</sup> ) | J'   | J''  | $\nu'$ | $\nu''$ | branch | $\nu$ (cm <sup>-1</sup> ) | J'   | J''  | $\nu'$ | $\nu''$ | branch |
|---------------------------|------|------|--------|---------|--------|---------------------------|------|------|--------|---------|--------|
| 2885.460                  | 11.5 | 11.5 | 1      | 4       | Q22    | 2822.149                  | 10.5 | 11.5 | 1      | 4       | P11    |
| 2881.387                  | 12.5 | 12.5 | 1      | 4       | Q22    | 2816.349                  | 11.5 | 12.5 | 1      | 4       | P11    |
| 2877.105                  | 13.5 | 13.5 | 1      | 4       | Q22    | 2810.231                  | 12.5 | 13.5 | 1      | 4       | P11    |
| 2872.606                  | 14.5 | 14.5 | 1      | 4       | Q22    | 2803.804                  | 13.5 | 14.5 | 1      | 4       | P11    |
| 2867.889                  | 15.5 | 15.5 | 1      | 4       | Q22    | 2797.072                  | 14.5 | 15.5 | 1      | 4       | P11    |
| 2862.948                  | 16.5 | 16.5 | 1      | 4       | Q22    | 2790.037                  | 15.5 | 16.5 | 1      | 4       | P11    |
| 2857.784                  | 17.5 | 17.5 | 1      | 4       | Q22    | 2782.705                  | 16.5 | 17.5 | 1      | 4       | P11    |
| 2852.384                  | 18.5 | 18.5 | 1      | 4       | Q22    | 2775.081                  | 17.5 | 18.5 | 1      | 4       | P11    |
| 2846.759                  | 19.5 | 19.5 | 1      | 4       | Q22    | 2663.033                  | 7.5  | 8.5  | 2      | 5       | P11    |
| 2840.894                  | 20.5 | 20.5 | 1      | 4       | Q22    | 2658.248                  | 8.5  | 9.5  | 2      | 5       | P11    |
| 2834.797                  | 21.5 | 21.5 | 1      | 4       | Q22    | 2653.121                  | 9.5  | 10.5 | 2      | 5       | P11    |
| 2828.462                  | 22.5 | 22.5 | 1      | 4       | Q22    | 2647.685                  | 10.5 | 11.5 | 2      | 5       | P11    |
| 2866.627                  | 1.5  | 1.5  | 1      | 4       | Q11    | 2641.922                  | 11.5 | 12.5 | 2      | 5       | P11    |
| 2867.537                  | 2.5  | 2.5  | 1      | 4       | Q11    | 2635.845                  | 12.5 | 13.5 | 2      | 5       | P11    |
| 2868.072                  | 3.5  | 3.5  | 1      | 4       | Q11    | 2629.461                  | 13.5 | 14.5 | 2      | 5       | P11    |
| 2868.271                  | 4.5  | 4.5  | 1      | 4       | Q11    | 2622.774                  | 14.5 | 15.5 | 2      | 5       | P11    |
| 2868.116                  | 5.5  | 5.5  | 1      | 4       | Q11    | 2615.785                  | 15.5 | 16.5 | 2      | 5       | P11    |
| 2867.607                  | 6.5  | 6.5  | 1      | 4       | Q11    | 2608.498                  | 16.5 | 17.5 | 2      | 5       | P11    |
| 2866.757                  | 7.5  | 7.5  | 1      | 4       | Q11    | 2600.919                  | 17.5 | 18.5 | 2      | 5       | P11    |
| 2865.573                  | 8.5  | 8.5  | 1      | 4       | Q11    | 2593.048                  | 18.5 | 19.5 | 2      | 5       | P11    |
| 2864.058                  | 9.5  | 9.5  | 1      | 4       | Q11    | 2584.901                  | 19.5 | 20.5 | 2      | 5       | P11    |
| 2862.219                  | 10.5 | 10.5 | 1      | 4       | Q11    | 2576.457                  | 20.5 | 21.5 | 2      | 5       | P11    |
| 2860.053                  | 11.5 | 11.5 | 1      | 4       | Q11    | 2567.727                  | 21.5 | 22.5 | 2      | 5       | P11    |
| 2857.577                  | 12.5 | 12.5 | 1      | 4       | Q11    | 2558.730                  | 22.5 | 23.5 | 2      | 5       | P11    |
| 2854.789                  | 13.5 | 13.5 | 1      | 4       | Q11    | 2724.131                  | 2.5  | 3.5  | 2      | 5       | P22    |
| 2851.694                  | 14.5 | 14.5 | 1      | 4       | Q11    | 2718.140                  | 3.5  | 4.5  | 2      | 5       | P22    |
| 2848.296                  | 15.5 | 15.5 | 1      | 4       | Q11    | 2712.010                  | 4.5  | 5.5  | 2      | 5       | P22    |
| 2844.598                  | 16.5 | 16.5 | 1      | 4       | Q11    | 2705.700                  | 5.5  | 6.5  | 2      | 5       | P22    |
| 2840.605                  | 17.5 | 17.5 | 1      | 4       | Q11    | 2699.204                  | 6.5  | 7.5  | 2      | 5       | P22    |
| 2836.319                  | 18.5 | 18.5 | 1      | 4       | Q11    | 2692.531                  | 7.5  | 8.5  | 2      | 5       | P22    |
| 2831.746                  | 19.5 | 19.5 | 1      | 4       | Q11    | 2685.667                  | 8.5  | 9.5  | 2      | 5       | P22    |
| 2826.882                  | 20.5 | 20.5 | 1      | 4       | Q11    | 2678.619                  | 9.5  | 10.5 | 2      | 5       | P22    |
| 2821.736                  | 21.5 | 21.5 | 1      | 4       | Q11    | 2671.368                  | 10.5 | 11.5 | 2      | 5       | P22    |
| 2816.307                  | 22.5 | 22.5 | 1      | 4       | Q11    | 2663.922                  | 11.5 | 12.5 | 2      | 5       | P22    |
| 2810.599                  | 23.5 | 23.5 | 1      | 4       | Q11    | 2656.260                  | 12.5 | 13.5 | 2      | 5       | P22    |
| 2804.608                  | 24.5 | 24.5 | 1      | 4       | Q11    | 2648.398                  | 13.5 | 14.5 | 2      | 5       | P22    |
| 2856.590                  | 2.5  | 3.5  | 1      | 4       | P11    | 2640.315                  | 14.5 | 15.5 | 2      | 5       | P22    |
| 2853.502                  | 3.5  | 4.5  | 1      | 4       | P11    | 2632.017                  | 15.5 | 16.5 | 2      | 5       | P22    |
| 2850.058                  | 4.5  | 5.5  | 1      | 4       | P11    | 2623.497                  | 16.5 | 17.5 | 2      | 5       | P22    |
| 2842.106                  | 6.5  | 7.5  | 1      | 4       | P11    | 2614.756                  | 17.5 | 18.5 | 2      | 5       | P22    |
| 2837.617                  | 7.5  | 8.5  | 1      | 4       | P11    | 2605.786                  | 18.5 | 19.5 | 2      | 5       | P22    |
| 2832.790                  | 8.5  | 9.5  | 1      | 4       | P11    | 2596.591                  | 19.5 | 20.5 | 2      | 5       | P22    |
| 2827.635                  | 9.5  | 10.5 | 1      | 4       | P11    | 2587.162                  | 20.5 | 21.5 | 2      | 5       | P22    |

Table S5 (continued)

| $\nu$ (cm <sup>-1</sup> ) | J'   | J''  | $\nu'$ | $\nu''$ | branch | $\nu$ (cm <sup>-1</sup> ) | J'   | J''  | $\nu'$ | $\nu''$ | branch |
|---------------------------|------|------|--------|---------|--------|---------------------------|------|------|--------|---------|--------|
| 2695.399                  | 1.5  | 0.5  | 2      | 5       | R11    | 2730.174                  | 24.5 | 23.5 | 2      | 5       | R22    |
| 2704.050                  | 3.5  | 2.5  | 2      | 5       | R11    | 2740.737                  | 1.5  | 1.5  | 2      | 5       | Q22    |
| 2707.840                  | 4.5  | 3.5  | 2      | 5       | R11    | 2738.531                  | 2.5  | 2.5  | 2      | 5       | Q22    |
| 2711.278                  | 5.5  | 4.5  | 2      | 5       | R11    | 2736.156                  | 3.5  | 3.5  | 2      | 5       | Q22    |
| 2714.370                  | 6.5  | 5.5  | 2      | 5       | R11    | 2733.610                  | 4.5  | 4.5  | 2      | 5       | Q22    |
| 2717.124                  | 7.5  | 6.5  | 2      | 5       | R11    | 2730.894                  | 5.5  | 5.5  | 2      | 5       | Q22    |
| 2719.538                  | 8.5  | 7.5  | 2      | 5       | R11    | 2728.002                  | 6.5  | 6.5  | 2      | 5       | Q22    |
| 2721.621                  | 9.5  | 8.5  | 2      | 5       | R11    | 2724.925                  | 7.5  | 7.5  | 2      | 5       | Q22    |
| 2723.374                  | 10.5 | 9.5  | 2      | 5       | R11    | 2721.661                  | 8.5  | 8.5  | 2      | 5       | Q22    |
| 2724.802                  | 11.5 | 10.5 | 2      | 5       | R11    | 2718.208                  | 9.5  | 9.5  | 2      | 5       | Q22    |
| 2725.923                  | 12.5 | 11.5 | 2      | 5       | R11    | 2714.554                  | 10.5 | 10.5 | 2      | 5       | Q22    |
| 2726.727                  | 13.5 | 12.5 | 2      | 5       | R11    | 2710.701                  | 11.5 | 11.5 | 2      | 5       | Q22    |
| 2727.219                  | 14.5 | 13.5 | 2      | 5       | R11    | 2706.637                  | 12.5 | 12.5 | 2      | 5       | Q22    |
| 2727.413                  | 15.5 | 14.5 | 2      | 5       | R11    | 2702.365                  | 13.5 | 13.5 | 2      | 5       | Q22    |
| 2727.297                  | 16.5 | 15.5 | 2      | 5       | R11    | 2697.877                  | 14.5 | 14.5 | 2      | 5       | Q22    |
| 2726.887                  | 17.5 | 16.5 | 2      | 5       | R11    | 2693.166                  | 15.5 | 15.5 | 2      | 5       | Q22    |
| 2726.175                  | 18.5 | 17.5 | 2      | 5       | R11    | 2688.243                  | 16.5 | 16.5 | 2      | 5       | Q22    |
| 2725.184                  | 19.5 | 18.5 | 2      | 5       | R11    | 2683.085                  | 17.5 | 17.5 | 2      | 5       | Q22    |
| 2723.890                  | 20.5 | 19.5 | 2      | 5       | R11    | 2677.706                  | 18.5 | 18.5 | 2      | 5       | Q22    |
| 2722.317                  | 21.5 | 20.5 | 2      | 5       | R11    | 2672.090                  | 19.5 | 19.5 | 2      | 5       | Q22    |
| 2720.450                  | 22.5 | 21.5 | 2      | 5       | R11    | 2666.243                  | 20.5 | 20.5 | 2      | 5       | Q22    |
| 2718.307                  | 23.5 | 22.5 | 2      | 5       | R11    | 2660.157                  | 21.5 | 21.5 | 2      | 5       | Q22    |
| 2715.874                  | 24.5 | 23.5 | 2      | 5       | R11    | 2653.837                  | 22.5 | 22.5 | 2      | 5       | Q22    |
| 2713.156                  | 25.5 | 24.5 | 2      | 5       | R11    | 2692.679                  | 2.5  | 2.5  | 2      | 5       | Q11    |
| 2751.675                  | 4.5  | 3.5  | 2      | 5       | R22    | 2693.412                  | 4.5  | 4.5  | 2      | 5       | Q11    |
| 2752.564                  | 5.5  | 4.5  | 2      | 5       | R22    | 2692.743                  | 6.5  | 6.5  | 2      | 5       | Q11    |
| 2753.275                  | 6.5  | 5.5  | 2      | 5       | R22    | 2691.893                  | 7.5  | 7.5  | 2      | 5       | Q11    |
| 2753.809                  | 7.5  | 6.5  | 2      | 5       | R22    | 2690.710                  | 8.5  | 8.5  | 2      | 5       | Q11    |
| 2754.145                  | 8.5  | 7.5  | 2      | 5       | R22    | 2689.198                  | 9.5  | 9.5  | 2      | 5       | Q11    |
| 2754.301                  | 9.5  | 8.5  | 2      | 5       | R22    | 2687.363                  | 10.5 | 10.5 | 2      | 5       | Q11    |
| 2754.238                  | 10.5 | 9.5  | 2      | 5       | R22    | 2685.205                  | 11.5 | 11.5 | 2      | 5       | Q11    |
| 2753.980                  | 11.5 | 10.5 | 2      | 5       | R22    | 2682.732                  | 12.5 | 12.5 | 2      | 5       | Q11    |
| 2753.513                  | 12.5 | 11.5 | 2      | 5       | R22    | 2679.953                  | 13.5 | 13.5 | 2      | 5       | Q11    |
| 2752.832                  | 13.5 | 12.5 | 2      | 5       | R22    | 2676.866                  | 14.5 | 14.5 | 2      | 5       | Q11    |
| 2751.929                  | 14.5 | 13.5 | 2      | 5       | R22    | 2673.478                  | 15.5 | 15.5 | 2      | 5       | Q11    |
| 2750.802                  | 15.5 | 14.5 | 2      | 5       | R22    | 2669.790                  | 16.5 | 16.5 | 2      | 5       | Q11    |
| 2749.455                  | 16.5 | 15.5 | 2      | 5       | R22    | 2665.812                  | 17.5 | 17.5 | 2      | 5       | Q11    |
| 2747.870                  | 17.5 | 16.5 | 2      | 5       | R22    | 2661.537                  | 18.5 | 18.5 | 2      | 5       | Q11    |
| 2746.061                  | 18.5 | 17.5 | 2      | 5       | R22    | 2656.975                  | 19.5 | 19.5 | 2      | 5       | Q11    |
| 2744.017                  | 19.5 | 18.5 | 2      | 5       | R22    | 2652.126                  | 20.5 | 20.5 | 2      | 5       | Q11    |
| 2739.205                  | 21.5 | 20.5 | 2      | 5       | R22    | 2646.992                  | 21.5 | 21.5 | 2      | 5       | Q11    |
| 2736.442                  | 22.5 | 21.5 | 2      | 5       | R22    | 2641.577                  | 22.5 | 22.5 | 2      | 5       | Q11    |
| 2733.426                  | 23.5 | 22.5 | 2      | 5       | R22    | 2629.910                  | 24.5 | 24.5 | 2      | 5       | Q11    |

Table S5 (continued)

| $\nu$ (cm <sup>-1</sup> ) | J'   | J''  | $\nu'$ | $\nu''$ | branch | $\nu$ (cm <sup>-1</sup> ) | J'   | J''  | $\nu'$ | $\nu''$ | branch |
|---------------------------|------|------|--------|---------|--------|---------------------------|------|------|--------|---------|--------|
| 2493.753                  | 6.5  | 7.5  | 3      | 6       | P11    | 2528.505                  | 13.5 | 13.5 | 3      | 6       | Q22    |
| 2489.328                  | 7.5  | 8.5  | 3      | 6       | P11    | 2524.031                  | 14.5 | 14.5 | 3      | 6       | Q22    |
| 2484.576                  | 8.5  | 9.5  | 3      | 6       | P11    | 2519.338                  | 15.5 | 15.5 | 3      | 6       | Q22    |
| 2479.504                  | 9.5  | 10.5 | 3      | 6       | P11    | 2514.417                  | 16.5 | 16.5 | 3      | 6       | Q22    |
| 2474.095                  | 10.5 | 11.5 | 3      | 6       | P11    | 2509.278                  | 17.5 | 17.5 | 3      | 6       | Q22    |
| 2468.367                  | 11.5 | 12.5 | 3      | 6       | P11    | 2503.902                  | 18.5 | 18.5 | 3      | 6       | Q22    |
| 2462.339                  | 12.5 | 13.5 | 3      | 6       | P11    | 2498.299                  | 19.5 | 19.5 | 3      | 6       | Q22    |
| 2456.000                  | 13.5 | 14.5 | 3      | 6       | P11    | 2492.470                  | 20.5 | 20.5 | 3      | 6       | Q22    |
| 2449.356                  | 14.5 | 15.5 | 3      | 6       | P11    | 2486.404                  | 21.5 | 21.5 | 3      | 6       | Q22    |
| 2442.415                  | 15.5 | 16.5 | 3      | 6       | P11    | 2517.840                  | 1.5  | 1.5  | 3      | 6       | Q11    |
| 2435.175                  | 16.5 | 17.5 | 3      | 6       | P11    | 2518.717                  | 2.5  | 2.5  | 3      | 6       | Q11    |
| 2427.641                  | 17.5 | 18.5 | 3      | 6       | P11    | 2519.434                  | 4.5  | 4.5  | 3      | 6       | Q11    |
| 2419.820                  | 18.5 | 19.5 | 3      | 6       | P11    | 2519.263                  | 5.5  | 5.5  | 3      | 6       | Q11    |
| 2411.711                  | 19.5 | 20.5 | 3      | 6       | P11    | 2518.758                  | 6.5  | 6.5  | 3      | 6       | Q11    |
| 2550.283                  | 2.5  | 3.5  | 3      | 6       | P22    | 2517.908                  | 7.5  | 7.5  | 3      | 6       | Q11    |
| 2544.364                  | 3.5  | 4.5  | 3      | 6       | P22    | 2516.724                  | 8.5  | 8.5  | 3      | 6       | Q11    |
| 2538.267                  | 4.5  | 5.5  | 3      | 6       | P22    | 2515.213                  | 9.5  | 9.5  | 3      | 6       | Q11    |
| 2532.000                  | 5.5  | 6.5  | 3      | 6       | P22    | 2513.382                  | 10.5 | 10.5 | 3      | 6       | Q11    |
| 2525.552                  | 6.5  | 7.5  | 3      | 6       | P22    | 2511.230                  | 11.5 | 11.5 | 3      | 6       | Q11    |
| 2518.928                  | 7.5  | 8.5  | 3      | 6       | P22    | 2508.766                  | 12.5 | 12.5 | 3      | 6       | Q11    |
| 2512.106                  | 8.5  | 9.5  | 3      | 6       | P22    | 2505.994                  | 13.5 | 13.5 | 3      | 6       | Q11    |
| 2505.112                  | 9.5  | 10.5 | 3      | 6       | P22    | 2502.917                  | 14.5 | 14.5 | 3      | 6       | Q11    |
| 2497.907                  | 10.5 | 11.5 | 3      | 6       | P22    | 2499.543                  | 15.5 | 15.5 | 3      | 6       | Q11    |
| 2490.498                  | 11.5 | 12.5 | 3      | 6       | P22    | 2495.863                  | 16.5 | 16.5 | 3      | 6       | Q11    |
| 2482.890                  | 12.5 | 13.5 | 3      | 6       | P22    | 2491.895                  | 17.5 | 17.5 | 3      | 6       | Q11    |
| 2475.066                  | 13.5 | 14.5 | 3      | 6       | P22    | 2487.636                  | 18.5 | 18.5 | 3      | 6       | Q11    |
| 2467.029                  | 14.5 | 15.5 | 3      | 6       | P22    | 2483.089                  | 19.5 | 19.5 | 3      | 6       | Q11    |
| 2458.781                  | 15.5 | 16.5 | 3      | 6       | P22    | 2478.257                  | 20.5 | 20.5 | 3      | 6       | Q11    |
| 2450.311                  | 16.5 | 17.5 | 3      | 6       | P22    | 2473.138                  | 21.5 | 21.5 | 3      | 6       | Q11    |
| 2441.616                  | 17.5 | 18.5 | 3      | 6       | P22    | 2578.409                  | 5.5  | 4.5  | 3      | 6       | R22    |
| 2432.697                  | 18.5 | 19.5 | 3      | 6       | P22    | 2579.095                  | 6.5  | 5.5  | 3      | 6       | R22    |
| 2566.736                  | 1.5  | 1.5  | 3      | 6       | Q22    | 2579.601                  | 7.5  | 6.5  | 3      | 6       | R22    |
| 2564.547                  | 2.5  | 2.5  | 3      | 6       | Q22    | 2579.678                  | 11.5 | 10.5 | 3      | 6       | R22    |
| 2562.187                  | 3.5  | 3.5  | 3      | 6       | Q22    | 2579.180                  | 12.5 | 11.5 | 3      | 6       | R22    |
| 2559.653                  | 4.5  | 4.5  | 3      | 6       | Q22    | 2578.473                  | 13.5 | 12.5 | 3      | 6       | R22    |
| 2556.946                  | 5.5  | 5.5  | 3      | 6       | Q22    | 2577.544                  | 14.5 | 13.5 | 3      | 6       | R22    |
| 2554.068                  | 6.5  | 6.5  | 3      | 6       | Q22    | 2576.391                  | 15.5 | 14.5 | 3      | 6       | R22    |
| 2551.002                  | 7.5  | 7.5  | 3      | 6       | Q22    | 2575.021                  | 16.5 | 15.5 | 3      | 6       | R22    |
| 2547.750                  | 8.5  | 8.5  | 3      | 6       | Q22    | 2573.417                  | 17.5 | 16.5 | 3      | 6       | R22    |
| 2544.302                  | 9.5  | 9.5  | 3      | 6       | Q22    | 2571.585                  | 18.5 | 17.5 | 3      | 6       | R22    |
| 2540.662                  | 10.5 | 10.5 | 3      | 6       | Q22    | 2561.877                  | 22.5 | 21.5 | 3      | 6       | R22    |
| 2536.820                  | 11.5 | 11.5 | 3      | 6       | Q22    | 2558.844                  | 23.5 | 22.5 | 3      | 6       | R22    |
| 2532.769                  | 12.5 | 12.5 | 3      | 6       | Q22    | 2555.575                  | 24.5 | 23.5 | 3      | 6       | R22    |

Table S5 (continued)

| $\nu$ (cm <sup>-1</sup> ) | J'   | J''  | $\nu'$ | $\nu''$ | branch | $\nu$ (cm <sup>-1</sup> ) | J'   | J''  | $\nu'$ | $\nu''$ | branch |
|---------------------------|------|------|--------|---------|--------|---------------------------|------|------|--------|---------|--------|
| 2521.421                  | 1.5  | 0.5  | 3      | 6       | R11    | 2356.803                  | 3.5  | 2.5  | 4      | 7       | R11    |
| 2525.868                  | 2.5  | 1.5  | 3      | 6       | R11    | 2360.509                  | 4.5  | 3.5  | 4      | 7       | R11    |
| 2529.974                  | 3.5  | 2.5  | 3      | 6       | R11    | 2366.886                  | 6.5  | 5.5  | 4      | 7       | R11    |
| 2533.721                  | 4.5  | 3.5  | 3      | 6       | R11    | 2369.564                  | 7.5  | 6.5  | 4      | 7       | R11    |
| 2537.120                  | 5.5  | 4.5  | 3      | 6       | R11    | 2371.911                  | 8.5  | 7.5  | 4      | 7       | R11    |
| 2540.173                  | 6.5  | 5.5  | 3      | 6       | R11    | 2373.926                  | 9.5  | 8.5  | 4      | 7       | R11    |
| 2542.890                  | 7.5  | 6.5  | 3      | 6       | R11    | 2375.615                  | 10.5 | 9.5  | 4      | 7       | R11    |
| 2545.270                  | 8.5  | 7.5  | 3      | 6       | R11    | 2376.999                  | 11.5 | 10.5 | 4      | 7       | R11    |
| 2547.316                  | 9.5  | 8.5  | 3      | 6       | R11    | 2378.057                  | 12.5 | 11.5 | 4      | 7       | R11    |
| 2549.039                  | 10.5 | 9.5  | 3      | 6       | R11    | 2378.801                  | 13.5 | 12.5 | 4      | 7       | R11    |
| 2550.441                  | 11.5 | 10.5 | 3      | 6       | R11    | 2379.245                  | 14.5 | 13.5 | 4      | 7       | R11    |
| 2551.532                  | 12.5 | 11.5 | 3      | 6       | R11    | 2379.384                  | 15.5 | 14.5 | 4      | 7       | R11    |
| 2552.303                  | 13.5 | 12.5 | 3      | 6       | R11    | 2378.764                  | 17.5 | 16.5 | 4      | 7       | R11    |
| 2552.769                  | 14.5 | 13.5 | 3      | 6       | R11    | 2337.727                  | 1.5  | 2.5  | 4      | 7       | P11    |
| 2552.940                  | 15.5 | 14.5 | 3      | 6       | R11    | 2335.067                  | 2.5  | 3.5  | 4      | 7       | P11    |
| 2552.801                  | 16.5 | 15.5 | 3      | 6       | R11    | 2332.047                  | 3.5  | 4.5  | 4      | 7       | P11    |
| 2552.368                  | 17.5 | 16.5 | 3      | 6       | R11    | 2328.693                  | 4.5  | 5.5  | 4      | 7       | P11    |
| 2551.635                  | 18.5 | 17.5 | 3      | 6       | R11    | 2320.925                  | 6.5  | 7.5  | 4      | 7       | P11    |
| 2550.618                  | 19.5 | 18.5 | 3      | 6       | R11    | 2316.544                  | 7.5  | 8.5  | 4      | 7       | P11    |
| 2549.305                  | 20.5 | 19.5 | 3      | 6       | R11    | 2311.827                  | 8.5  | 9.5  | 4      | 7       | P11    |
| 2547.710                  | 21.5 | 20.5 | 3      | 6       | R11    | 2306.789                  | 9.5  | 10.5 | 4      | 7       | P11    |
| 2545.829                  | 22.5 | 21.5 | 3      | 6       | R11    | 2301.423                  | 10.5 | 11.5 | 4      | 7       | P11    |
| 2543.665                  | 23.5 | 22.5 | 3      | 6       | R11    | 2295.747                  | 11.5 | 12.5 | 4      | 7       | P11    |
| 2541.219                  | 24.5 | 23.5 | 3      | 6       | R11    | 2289.756                  | 12.5 | 13.5 | 4      | 7       | P11    |
| 2538.489                  | 25.5 | 24.5 | 3      | 6       | R11    | 2283.452                  | 13.5 | 14.5 | 4      | 7       | P11    |
| 2403.296                  | 3.5  | 2.5  | 4      | 7       | R22    | 2276.855                  | 14.5 | 15.5 | 4      | 7       | P11    |
| 2404.317                  | 4.5  | 3.5  | 4      | 7       | R22    | 2269.959                  | 15.5 | 16.5 | 4      | 7       | P11    |
| 2405.160                  | 5.5  | 4.5  | 4      | 7       | R22    | 2262.766                  | 16.5 | 17.5 | 4      | 7       | P11    |
| 2405.824                  | 6.5  | 5.5  | 4      | 7       | R22    | 2255.279                  | 17.5 | 18.5 | 4      | 7       | P11    |
| 2406.311                  | 7.5  | 6.5  | 4      | 7       | R22    | 2247.512                  | 18.5 | 19.5 | 4      | 7       | P11    |
| 2406.696                  | 9.5  | 8.5  | 4      | 7       | R22    | 2239.460                  | 19.5 | 20.5 | 4      | 7       | P11    |
| 2405.756                  | 12.5 | 11.5 | 4      | 7       | R22    | 2231.118                  | 20.5 | 21.5 | 4      | 7       | P11    |
| 2405.029                  | 13.5 | 12.5 | 4      | 7       | R22    | 2222.492                  | 21.5 | 22.5 | 4      | 7       | P11    |
| 2404.074                  | 14.5 | 13.5 | 4      | 7       | R22    | 2383.064                  | 1.5  | 2.5  | 4      | 7       | P22    |
| 2402.906                  | 15.5 | 14.5 | 4      | 7       | R22    | 2377.362                  | 2.5  | 3.5  | 4      | 7       | P22    |
| 2401.505                  | 16.5 | 15.5 | 4      | 7       | R22    | 2365.438                  | 4.5  | 5.5  | 4      | 7       | P22    |
| 2399.881                  | 17.5 | 16.5 | 4      | 7       | R22    | 2359.216                  | 5.5  | 6.5  | 4      | 7       | P22    |
| 2398.027                  | 18.5 | 17.5 | 4      | 7       | R22    | 2352.815                  | 6.5  | 7.5  | 4      | 7       | P22    |
| 2395.945                  | 19.5 | 18.5 | 4      | 7       | R22    | 2346.229                  | 7.5  | 8.5  | 4      | 7       | P22    |
| 2393.620                  | 20.5 | 19.5 | 4      | 7       | R22    | 2339.472                  | 8.5  | 9.5  | 4      | 7       | P22    |
| 2391.065                  | 21.5 | 20.5 | 4      | 7       | R22    | 2332.513                  | 9.5  | 10.5 | 4      | 7       | P22    |
| 2348.339                  | 1.5  | 0.5  | 4      | 7       | R11    | 2325.343                  | 10.5 | 11.5 | 4      | 7       | P22    |
| 2352.746                  | 2.5  | 1.5  | 4      | 7       | R11    | 2317.989                  | 11.5 | 12.5 | 4      | 7       | P22    |

Table S5 (continued)

| $\nu$ (cm <sup>-1</sup> ) | J'   | J''  | $\nu'$ | $\nu''$ | branch | $\nu$ (cm <sup>-1</sup> ) | J'   | J''  | $\nu'$ | $\nu''$ | branch |
|---------------------------|------|------|--------|---------|--------|---------------------------|------|------|--------|---------|--------|
| 2310.430                  | 12.5 | 13.5 | 4      | 7       | P22    | 2335.717                  | 12.5 | 12.5 | 4      | 7       | Q11    |
| 2294.670                  | 14.5 | 15.5 | 4      | 7       | P22    | 2332.952                  | 13.5 | 13.5 | 4      | 7       | Q11    |
| 2286.468                  | 15.5 | 16.5 | 4      | 7       | P22    | 2329.891                  | 14.5 | 14.5 | 4      | 7       | Q11    |
| 2278.038                  | 16.5 | 17.5 | 4      | 7       | P22    | 2326.511                  | 15.5 | 15.5 | 4      | 7       | Q11    |
| 2269.391                  | 17.5 | 18.5 | 4      | 7       | P22    | 2322.851                  | 16.5 | 16.5 | 4      | 7       | Q11    |
| 2260.520                  | 18.5 | 19.5 | 4      | 7       | P22    | 2318.895                  | 17.5 | 17.5 | 4      | 7       | Q11    |
| 2251.424                  | 19.5 | 20.5 | 4      | 7       | P22    | 2314.651                  | 18.5 | 18.5 | 4      | 7       | Q11    |
| 2242.092                  | 20.5 | 21.5 | 4      | 7       | P22    | 2310.120                  | 19.5 | 19.5 | 4      | 7       | Q11    |
| 2232.534                  | 21.5 | 22.5 | 4      | 7       | P22    | 2305.301                  | 20.5 | 20.5 | 4      | 7       | Q11    |
| 2222.741                  | 22.5 | 23.5 | 4      | 7       | P22    | 2300.203                  | 21.5 | 21.5 | 4      | 7       | Q11    |
| 2395.664                  | 0.5  | 0.5  | 4      | 7       | Q22    | 2294.823                  | 22.5 | 22.5 | 4      | 7       | Q11    |
| 2393.656                  | 1.5  | 1.5  | 4      | 7       | Q22    | 2289.164                  | 23.5 | 23.5 | 4      | 7       | Q11    |
| 2391.475                  | 2.5  | 2.5  | 4      | 7       | Q22    | 2283.229                  | 24.5 | 24.5 | 4      | 7       | Q11    |
| 2389.130                  | 3.5  | 3.5  | 4      | 7       | Q22    | 2156.743                  | 4.5  | 5.5  | 5      | 8       | P11    |
| 2386.610                  | 4.5  | 4.5  | 4      | 7       | Q22    | 2153.064                  | 5.5  | 6.5  | 5      | 8       | P11    |
| 2383.917                  | 5.5  | 5.5  | 4      | 7       | Q22    | 2149.053                  | 6.5  | 7.5  | 5      | 8       | P11    |
| 2381.051                  | 6.5  | 6.5  | 4      | 7       | Q22    | 2144.700                  | 7.5  | 8.5  | 5      | 8       | P11    |
| 2377.992                  | 7.5  | 7.5  | 4      | 7       | Q22    | 2140.026                  | 8.5  | 9.5  | 5      | 8       | P11    |
| 2371.320                  | 9.5  | 9.5  | 4      | 7       | Q22    | 2135.024                  | 9.5  | 10.5 | 5      | 8       | P11    |
| 2367.689                  | 10.5 | 10.5 | 4      | 7       | Q22    | 2129.698                  | 10.5 | 11.5 | 5      | 8       | P11    |
| 2363.853                  | 11.5 | 11.5 | 4      | 7       | Q22    | 2124.061                  | 11.5 | 12.5 | 5      | 8       | P11    |
| 2359.816                  | 12.5 | 12.5 | 4      | 7       | Q22    | 2118.117                  | 12.5 | 13.5 | 5      | 8       | P11    |
| 2355.561                  | 13.5 | 13.5 | 4      | 7       | Q22    | 2111.870                  | 13.5 | 14.5 | 5      | 8       | P11    |
| 2351.097                  | 14.5 | 14.5 | 4      | 7       | Q22    | 2105.308                  | 14.5 | 15.5 | 5      | 8       | P11    |
| 2346.413                  | 15.5 | 15.5 | 4      | 7       | Q22    | 2098.461                  | 15.5 | 16.5 | 5      | 8       | P11    |
| 2341.507                  | 16.5 | 16.5 | 4      | 7       | Q22    | 2091.315                  | 16.5 | 17.5 | 5      | 8       | P11    |
| 2336.383                  | 17.5 | 17.5 | 4      | 7       | Q22    | 2083.882                  | 17.5 | 18.5 | 5      | 8       | P11    |
| 2331.027                  | 18.5 | 18.5 | 4      | 7       | Q22    | 2076.163                  | 18.5 | 19.5 | 5      | 8       | P11    |
| 2325.431                  | 19.5 | 19.5 | 4      | 7       | Q22    | 2068.153                  | 19.5 | 20.5 | 5      | 8       | P11    |
| 2319.617                  | 20.5 | 20.5 | 4      | 7       | Q22    | 2059.869                  | 20.5 | 21.5 | 5      | 8       | P11    |
| 2313.563                  | 21.5 | 21.5 | 4      | 7       | Q22    | 2051.295                  | 21.5 | 22.5 | 5      | 8       | P11    |
| 2307.276                  | 22.5 | 22.5 | 4      | 7       | Q22    | 2211.045                  | 1.5  | 2.5  | 5      | 8       | P22    |
| 2344.801                  | 1.5  | 1.5  | 4      | 7       | Q11    | 2205.373                  | 2.5  | 3.5  | 5      | 8       | P22    |
| 2345.681                  | 2.5  | 2.5  | 4      | 7       | Q11    | 2199.561                  | 3.5  | 4.5  | 5      | 8       | P22    |
| 2346.192                  | 3.5  | 3.5  | 4      | 7       | Q11    | 2193.557                  | 4.5  | 5.5  | 5      | 8       | P22    |
| 2346.368                  | 4.5  | 4.5  | 4      | 7       | Q11    | 2187.388                  | 5.5  | 6.5  | 5      | 8       | P22    |
| 2346.192                  | 5.5  | 5.5  | 4      | 7       | Q11    | 2181.035                  | 6.5  | 7.5  | 5      | 8       | P22    |
| 2345.681                  | 6.5  | 6.5  | 4      | 7       | Q11    | 2174.508                  | 7.5  | 8.5  | 5      | 8       | P22    |
| 2344.834                  | 7.5  | 7.5  | 4      | 7       | Q11    | 2167.781                  | 8.5  | 9.5  | 5      | 8       | P22    |
| 2343.651                  | 8.5  | 8.5  | 4      | 7       | Q11    | 2160.862                  | 9.5  | 10.5 | 5      | 8       | P22    |
| 2342.145                  | 9.5  | 9.5  | 4      | 7       | Q11    | 2153.754                  | 10.5 | 11.5 | 5      | 8       | P22    |
| 2340.318                  | 10.5 | 10.5 | 4      | 7       | Q11    | 2146.444                  | 11.5 | 12.5 | 5      | 8       | P22    |
| 2338.173                  | 11.5 | 11.5 | 4      | 7       | Q11    | 2138.926                  | 12.5 | 13.5 | 5      | 8       | P22    |



Table S5 (continued)

| $\nu$ (cm <sup>-1</sup> ) | J'   | J''  | $\nu'$ | $\nu''$ | branch | $\nu$ (cm <sup>-1</sup> ) | J'   | J''  | $\nu'$ | $\nu''$ | branch |
|---------------------------|------|------|--------|---------|--------|---------------------------|------|------|--------|---------|--------|
| 2131.205                  | 13.5 | 14.5 | 5      | 8       | P22    | 2191.840                  | 11.5 | 11.5 | 5      | 8       | Q22    |
| 2123.264                  | 14.5 | 15.5 | 5      | 8       | P22    | 2187.813                  | 12.5 | 12.5 | 5      | 8       | Q22    |
| 2115.105                  | 15.5 | 16.5 | 5      | 8       | P22    | 2183.576                  | 13.5 | 13.5 | 5      | 8       | Q22    |
| 2106.730                  | 16.5 | 17.5 | 5      | 8       | P22    | 2179.122                  | 14.5 | 14.5 | 5      | 8       | Q22    |
| 2098.133                  | 17.5 | 18.5 | 5      | 8       | P22    | 2174.454                  | 15.5 | 15.5 | 5      | 8       | Q22    |
| 2089.309                  | 18.5 | 19.5 | 5      | 8       | P22    | 2169.559                  | 16.5 | 16.5 | 5      | 8       | Q22    |
| 2080.259                  | 19.5 | 20.5 | 5      | 8       | P22    | 2164.446                  | 17.5 | 17.5 | 5      | 8       | Q22    |
| 2070.983                  | 20.5 | 21.5 | 5      | 8       | P22    | 2159.104                  | 18.5 | 18.5 | 5      | 8       | Q22    |
| 2061.482                  | 21.5 | 22.5 | 5      | 8       | P22    | 2153.528                  | 19.5 | 19.5 | 5      | 8       | Q22    |
| 2172.704                  | 1.5  | 1.5  | 5      | 8       | Q11    | 2147.727                  | 20.5 | 20.5 | 5      | 8       | Q22    |
| 2174.069                  | 3.5  | 3.5  | 5      | 8       | Q11    | 2141.690                  | 21.5 | 21.5 | 5      | 8       | Q22    |
| 2174.246                  | 4.5  | 4.5  | 5      | 8       | Q11    | 2135.415                  | 22.5 | 22.5 | 5      | 8       | Q22    |
| 2174.069                  | 5.5  | 5.5  | 5      | 8       | Q11    | 2176.207                  | 1.5  | 0.5  | 5      | 8       | R11    |
| 2173.555                  | 6.5  | 6.5  | 5      | 8       | Q11    | 2180.573                  | 2.5  | 1.5  | 5      | 8       | R11    |
| 2172.704                  | 7.5  | 7.5  | 5      | 8       | Q11    | 2184.579                  | 3.5  | 2.5  | 5      | 8       | R11    |
| 2171.527                  | 8.5  | 8.5  | 5      | 8       | Q11    | 2188.246                  | 4.5  | 3.5  | 5      | 8       | R11    |
| 2170.024                  | 9.5  | 9.5  | 5      | 8       | Q11    | 2191.563                  | 5.5  | 4.5  | 5      | 8       | R11    |
| 2168.201                  | 10.5 | 10.5 | 5      | 8       | Q11    | 2194.546                  | 6.5  | 5.5  | 5      | 8       | R11    |
| 2166.062                  | 11.5 | 11.5 | 5      | 8       | Q11    | 2197.180                  | 7.5  | 6.5  | 5      | 8       | R11    |
| 2163.616                  | 12.5 | 12.5 | 5      | 8       | Q11    | 2199.499                  | 8.5  | 7.5  | 5      | 8       | R11    |
| 2160.862                  | 13.5 | 13.5 | 5      | 8       | Q11    | 2201.483                  | 9.5  | 8.5  | 5      | 8       | R11    |
| 2157.805                  | 14.5 | 14.5 | 5      | 8       | Q11    | 2203.144                  | 10.5 | 9.5  | 5      | 8       | R11    |
| 2154.447                  | 15.5 | 15.5 | 5      | 8       | Q11    | 2204.488                  | 11.5 | 10.5 | 5      | 8       | R11    |
| 2150.796                  | 16.5 | 16.5 | 5      | 8       | Q11    | 2205.521                  | 12.5 | 11.5 | 5      | 8       | R11    |
| 2146.854                  | 17.5 | 17.5 | 5      | 8       | Q11    | 2206.243                  | 13.5 | 12.5 | 5      | 8       | R11    |
| 2142.624                  | 18.5 | 18.5 | 5      | 8       | Q11    | 2206.661                  | 14.5 | 13.5 | 5      | 8       | R11    |
| 2138.108                  | 19.5 | 19.5 | 5      | 8       | Q11    | 2206.775                  | 15.5 | 14.5 | 5      | 8       | R11    |
| 2133.306                  | 20.5 | 20.5 | 5      | 8       | Q11    | 2206.589                  | 16.5 | 15.5 | 5      | 8       | R11    |
| 2128.224                  | 21.5 | 21.5 | 5      | 8       | Q11    | 2206.114                  | 17.5 | 16.5 | 5      | 8       | R11    |
| 2122.861                  | 22.5 | 22.5 | 5      | 8       | Q11    | 2205.337                  | 18.5 | 17.5 | 5      | 8       | R11    |
| 2117.225                  | 23.5 | 23.5 | 5      | 8       | Q11    | 2204.277                  | 19.5 | 18.5 | 5      | 8       | R11    |
| 2111.305                  | 24.5 | 24.5 | 5      | 8       | Q11    | 2202.929                  | 20.5 | 19.5 | 5      | 8       | R11    |
| 2223.514                  | 0.5  | 0.5  | 5      | 8       | Q22    | 2201.293                  | 21.5 | 20.5 | 5      | 8       | R11    |
| 2221.516                  | 1.5  | 1.5  | 5      | 8       | Q22    | 2194.696                  | 24.5 | 23.5 | 5      | 8       | R11    |
| 2219.360                  | 2.5  | 2.5  | 5      | 8       | Q22    | 2191.935                  | 25.5 | 24.5 | 5      | 8       | R11    |
| 2217.022                  | 3.5  | 3.5  | 5      | 8       | Q22    | 2232.048                  | 4.5  | 3.5  | 5      | 8       | R22    |
| 2214.518                  | 4.5  | 4.5  | 5      | 8       | Q22    | 2233.504                  | 6.5  | 5.5  | 5      | 8       | R22    |
| 2211.838                  | 5.5  | 5.5  | 5      | 8       | Q22    | 2233.964                  | 7.5  | 6.5  | 5      | 8       | R22    |
| 2208.980                  | 6.5  | 6.5  | 5      | 8       | Q22    | 2234.238                  | 8.5  | 7.5  | 5      | 8       | R22    |
| 2205.938                  | 7.5  | 7.5  | 5      | 8       | Q22    | 2234.304                  | 9.5  | 8.5  | 5      | 8       | R22    |
| 2202.707                  | 8.5  | 8.5  | 5      | 8       | Q22    | 2234.173                  | 10.5 | 9.5  | 5      | 8       | R22    |
| 2199.284                  | 9.5  | 9.5  | 5      | 8       | Q22    | 2233.837                  | 11.5 | 10.5 | 5      | 8       | R22    |
| 2195.663                  | 10.5 | 10.5 | 5      | 8       | Q22    | 2233.297                  | 12.5 | 11.5 | 5      | 8       | R22    |

Table S5 (continued)

| $\nu$ (cm <sup>-1</sup> ) | J'   | J''  | $\nu'$ | $\nu''$ | branch | $\nu$ (cm <sup>-1</sup> ) | J'   | J''  | $\nu'$ | $\nu''$ | branch |
|---------------------------|------|------|--------|---------|--------|---------------------------|------|------|--------|---------|--------|
| 2232.534                  | 13.5 | 12.5 | 5      | 8       | R22    | 1986.723                  | 14.5 | 14.5 | 6      | 9       | Q11    |
| 2231.564                  | 14.5 | 13.5 | 5      | 8       | R22    | 1983.379                  | 15.5 | 15.5 | 6      | 9       | Q11    |
| 2230.371                  | 15.5 | 14.5 | 5      | 8       | R22    | 1979.748                  | 16.5 | 16.5 | 6      | 9       | Q11    |
| 2228.946                  | 16.5 | 15.5 | 5      | 8       | R22    | 1975.822                  | 17.5 | 17.5 | 6      | 9       | Q11    |
| 2227.298                  | 17.5 | 16.5 | 5      | 8       | R22    | 1971.613                  | 18.5 | 18.5 | 6      | 9       | Q11    |
| 2225.421                  | 18.5 | 17.5 | 5      | 8       | R22    | 1967.118                  | 19.5 | 19.5 | 6      | 9       | Q11    |
| 2223.305                  | 19.5 | 18.5 | 5      | 8       | R22    | 1962.337                  | 20.5 | 20.5 | 6      | 9       | Q11    |
| 2218.383                  | 21.5 | 20.5 | 5      | 8       | R22    | 1989.108                  | 3.5  | 3.5  | 6      | 9       | Q12    |
| 2215.552                  | 22.5 | 21.5 | 5      | 8       | R22    | 1985.816                  | 4.5  | 4.5  | 6      | 9       | Q12    |
| 1973.846                  | 7.5  | 8.5  | 6      | 9       | P11    | 1982.182                  | 5.5  | 5.5  | 6      | 9       | Q12    |
| 1969.200                  | 8.5  | 9.5  | 6      | 9       | P11    | 1978.202                  | 6.5  | 6.5  | 6      | 9       | Q12    |
| 1964.247                  | 9.5  | 10.5 | 6      | 9       | P11    | 2060.744                  | 4.5  | 4.5  | 6      | 9       | Q12    |
| 1958.962                  | 10.5 | 11.5 | 6      | 9       | P11    | 2061.542                  | 5.5  | 5.5  | 6      | 9       | Q12    |
| 1953.375                  | 11.5 | 12.5 | 6      | 9       | P11    | 2062.165                  | 6.5  | 6.5  | 6      | 9       | Q12    |
| 1947.476                  | 12.5 | 13.5 | 6      | 9       | P11    | 2062.587                  | 7.5  | 7.5  | 6      | 9       | Q12    |
| 1941.274                  | 13.5 | 14.5 | 6      | 9       | P11    | 2062.868                  | 9.5  | 9.5  | 6      | 9       | Q12    |
| 1927.962                  | 15.5 | 16.5 | 6      | 9       | P11    | 2062.704                  | 10.5 | 10.5 | 6      | 9       | Q12    |
| 1920.865                  | 16.5 | 17.5 | 6      | 9       | P11    | 2043.434                  | 4.5  | 4.5  | 6      | 9       | Q12    |
| 1905.822                  | 18.5 | 19.5 | 6      | 9       | P11    | 2040.765                  | 5.5  | 5.5  | 6      | 9       | Q12    |
| 1978.202                  | 2.5  | 3.5  | 6      | 9       | P12    | 2037.913                  | 6.5  | 6.5  | 6      | 9       | Q12    |
| 2040.729                  | 5.5  | 6.5  | 6      | 9       | P21    | 2034.894                  | 7.5  | 7.5  | 6      | 9       | Q12    |
| 2037.874                  | 6.5  | 7.5  | 6      | 9       | P21    | 2031.666                  | 8.5  | 8.5  | 6      | 9       | Q12    |
| 2034.405                  | 2.5  | 3.5  | 6      | 9       | P22    | 2028.249                  | 9.5  | 9.5  | 6      | 9       | Q12    |
| 2022.692                  | 4.5  | 5.5  | 6      | 9       | P22    | 2024.651                  | 10.5 | 10.5 | 6      | 9       | Q12    |
| 2003.776                  | 7.5  | 8.5  | 6      | 9       | P22    | 2020.845                  | 11.5 | 11.5 | 6      | 9       | Q12    |
| 1997.115                  | 8.5  | 9.5  | 6      | 9       | P22    | 2016.824                  | 12.5 | 12.5 | 6      | 9       | Q12    |
| 1990.235                  | 9.5  | 10.5 | 6      | 9       | P22    | 2012.598                  | 13.5 | 13.5 | 6      | 9       | Q12    |
| 1983.173                  | 10.5 | 11.5 | 6      | 9       | P22    | 2008.161                  | 14.5 | 14.5 | 6      | 9       | Q12    |
| 1975.909                  | 11.5 | 12.5 | 6      | 9       | P22    | 2003.503                  | 15.5 | 15.5 | 6      | 9       | Q12    |
| 1968.441                  | 12.5 | 13.5 | 6      | 9       | P22    | 1998.624                  | 16.5 | 16.5 | 6      | 9       | Q12    |
| 1944.761                  | 15.5 | 16.5 | 6      | 9       | P22    | 1993.523                  | 17.5 | 17.5 | 6      | 9       | Q12    |
| 1936.431                  | 16.5 | 17.5 | 6      | 9       | P22    | 1982.641                  | 19.5 | 19.5 | 6      | 9       | Q12    |
| 2002.445                  | 2.5  | 2.5  | 6      | 9       | Q11    | 1964.587                  | 22.5 | 22.5 | 6      | 9       | Q12    |
| 2003.103                  | 4.5  | 4.5  | 6      | 9       | Q11    | 2020.243                  | 5.5  | 4.5  | 6      | 9       | Q12    |
| 2002.931                  | 5.5  | 5.5  | 6      | 9       | Q11    | 2025.793                  | 7.5  | 6.5  | 6      | 9       | Q12    |
| 2002.410                  | 6.5  | 6.5  | 6      | 9       | Q11    | 2028.071                  | 8.5  | 7.5  | 6      | 9       | Q12    |
| 2001.561                  | 7.5  | 7.5  | 6      | 9       | Q11    | 2030.025                  | 9.5  | 8.5  | 6      | 9       | Q12    |
| 2000.388                  | 8.5  | 8.5  | 6      | 9       | Q11    | 2031.666                  | 10.5 | 9.5  | 6      | 9       | Q12    |
| 1998.893                  | 9.5  | 9.5  | 6      | 9       | Q11    | 2033.982                  | 12.5 | 11.5 | 6      | 9       | Q12    |
| 1997.079                  | 10.5 | 10.5 | 6      | 9       | Q11    | 2034.675                  | 13.5 | 12.5 | 6      | 9       | Q12    |
| 1994.952                  | 11.5 | 11.5 | 6      | 9       | Q11    | 2035.156                  | 15.5 | 14.5 | 6      | 9       | Q12    |
| 1992.507                  | 12.5 | 12.5 | 6      | 9       | Q11    | 2034.962                  | 16.5 | 15.5 | 6      | 9       | Q12    |
| 1989.766                  | 13.5 | 13.5 | 6      | 9       | Q11    | 2034.459                  | 17.5 | 16.5 | 6      | 9       | Q12    |

Table S5 (continued)

| $\nu$ (cm <sup>-1</sup> ) | J'   | J''  | $\nu'$ | $\nu''$ | branch |
|---------------------------|------|------|--------|---------|--------|
| 2033.667                  | 18.5 | 17.5 | 6      | 9       | R11    |
| 2032.593                  | 19.5 | 18.5 | 6      | 9       | R11    |
| 2027.638                  | 22.5 | 21.5 | 6      | 9       | R11    |
| 2002.445                  | 2.5  | 1.5  | 6      | 9       | R12    |
| 2002.445                  | 6.5  | 5.5  | 6      | 9       | R12    |
| 2000.434                  | 8.5  | 7.5  | 6      | 9       | R12    |
| 1998.940                  | 9.5  | 8.5  | 6      | 9       | R12    |
| 1995.014                  | 11.5 | 10.5 | 6      | 9       | R12    |
| 2062.200                  | 6.5  | 5.5  | 6      | 9       | R22    |
| 2062.632                  | 7.5  | 6.5  | 6      | 9       | R22    |
| 2062.868                  | 8.5  | 7.5  | 6      | 9       | R22    |
| 2062.920                  | 9.5  | 8.5  | 6      | 9       | R22    |
| 2062.766                  | 10.5 | 9.5  | 6      | 9       | R22    |
| 2062.409                  | 11.5 | 10.5 | 6      | 9       | R22    |
| 2061.837                  | 12.5 | 11.5 | 6      | 9       | R22    |
| 2060.065                  | 14.5 | 13.5 | 6      | 9       | R22    |

Table S6: Emission lines of the CN radical for  $A^2\Pi \rightarrow X^2\Sigma^+$  transitions and  $\Delta v = -2$ 

| $\nu$ (cm <sup>-1</sup> ) | J'   | J''  | $v'$ | $v''$ | $\nu$ (cm <sup>-1</sup> ) | J'   | J''  | $v'$ | $v''$ |
|---------------------------|------|------|------|-------|---------------------------|------|------|------|-------|
| 4187.060                  | 55.5 | 56.5 | 0    | 2     | 4836.980                  | 27.5 | 28.5 | 0    | 2     |
| 4384.736                  | 46.5 | 47.5 | 0    | 2     | 4838.876                  | 19.5 | 20.5 | 0    | 2     |
| 4401.342                  | 54.5 | 55.5 | 0    | 2     | 4842.401                  | 37.5 | 37.5 | 0    | 2     |
| 4419.728                  | 65.5 | 65.5 | 0    | 2     | 4844.780                  | 26.5 | 27.5 | 0    | 2     |
| 4427.216                  | 64.5 | 64.5 | 0    | 2     | 4849.194                  | 26.5 | 27.5 | 0    | 2     |
| 4440.598                  | 52.5 | 53.5 | 0    | 2     | 4851.492                  | 18.5 | 19.5 | 0    | 2     |
| 4459.823                  | 51.5 | 52.5 | 0    | 2     | 4867.243                  | 49.5 | 48.5 | 0    | 2     |
| 4465.156                  | 62.5 | 62.5 | 0    | 2     | 4874.208                  | 34.5 | 33.5 | 0    | 2     |
| 4497.418                  | 49.5 | 50.5 | 0    | 2     | 4876.348                  | 34.5 | 34.5 | 0    | 2     |
| 4506.292                  | 49.5 | 49.5 | 0    | 2     | 4877.305                  | 23.5 | 24.5 | 0    | 2     |
| 4515.793                  | 48.5 | 49.5 | 0    | 2     | 4878.133                  | 48.5 | 47.5 | 0    | 2     |
| 4529.501                  | 59.5 | 59.5 | 0    | 2     | 4896.900                  | 32.5 | 33.5 | 0    | 2     |
| 4541.865                  | 47.5 | 47.5 | 0    | 2     | 4897.432                  | 21.5 | 22.5 | 0    | 2     |
| 4551.711                  | 46.5 | 47.5 | 0    | 2     | 4898.701                  | 14.5 | 15.5 | 0    | 2     |
| 4575.975                  | 45.5 | 46.5 | 0    | 2     | 4898.884                  | 46.5 | 45.5 | 0    | 2     |
| 4580.511                  | 56.5 | 56.5 | 0    | 2     | 4906.127                  | 21.5 | 22.5 | 0    | 2     |
| 4588.570                  | 55.5 | 56.5 | 0    | 2     | 4909.341                  | 45.5 | 44.5 | 0    | 2     |
| 4603.495                  | 43.5 | 44.5 | 0    | 2     | 4916.693                  | 20.5 | 21.5 | 0    | 2     |
| 4609.256                  | 43.5 | 44.5 | 0    | 2     | 4919.501                  | 44.5 | 43.5 | 0    | 2     |
| 4613.054                  | 54.5 | 54.5 | 0    | 2     | 4925.252                  | 18.5 | 19.5 | 0    | 2     |
| 4652.749                  | 40.5 | 41.5 | 0    | 2     | 4925.395                  | 18.5 | 18.5 | 0    | 2     |
| 4653.081                  | 51.5 | 52.5 | 0    | 2     | 4926.986                  | 19.5 | 20.5 | 0    | 2     |
| 4660.060                  | 51.5 | 50.5 | 0    | 2     | 4930.614                  | 11.5 | 12.5 | 0    | 2     |
| 4674.663                  | 50.5 | 50.5 | 0    | 2     | 4933.883                  | 17.5 | 18.5 | 0    | 2     |
| 4687.681                  | 38.5 | 38.5 | 0    | 2     | 4934.024                  | 17.5 | 17.5 | 0    | 2     |
| 4702.155                  | 37.5 | 38.5 | 0    | 2     | 4935.077                  | 28.5 | 29.5 | 0    | 2     |
| 4713.013                  | 47.5 | 48.5 | 0    | 2     | 4937.016                  | 27.5 | 27.5 | 0    | 2     |
| 4713.263                  | 61.5 | 60.5 | 0    | 2     | 4940.562                  | 10.5 | 11.5 | 0    | 2     |
| 4731.022                  | 35.5 | 35.5 | 0    | 2     | 4942.315                  | 16.5 | 16.5 | 0    | 2     |
| 4741.910                  | 59.5 | 58.5 | 0    | 2     | 4948.218                  | 41.5 | 40.5 | 0    | 2     |
| 4750.464                  | 58.5 | 57.5 | 0    | 2     | 4950.157                  | 9.5  | 10.5 | 0    | 2     |
| 4755.790                  | 58.5 | 57.5 | 0    | 2     | 4950.288                  | 15.5 | 15.5 | 0    | 2     |
| 4771.727                  | 32.5 | 33.5 | 0    | 2     | 4956.287                  | 16.5 | 17.5 | 0    | 2     |
| 4778.144                  | 56.5 | 55.5 | 0    | 2     | 4957.919                  | 14.5 | 14.5 | 0    | 2     |
| 4784.672                  | 31.5 | 31.5 | 0    | 2     | 4959.394                  | 8.5  | 9.5  | 0    | 2     |
| 4785.294                  | 23.5 | 24.5 | 0    | 2     | 4959.599                  | 24.5 | 23.5 | 0    | 2     |
| 4797.111                  | 30.5 | 31.5 | 0    | 2     | 4960.736                  | 25.5 | 26.5 | 0    | 2     |
| 4808.131                  | 40.5 | 40.5 | 0    | 2     | 4965.530                  | 15.5 | 16.5 | 0    | 2     |
| 4819.100                  | 39.5 | 40.5 | 0    | 2     | 4970.334                  | 38.5 | 37.5 | 0    | 2     |
| 4829.606                  | 52.5 | 52.5 | 0    | 2     | 4974.516                  | 14.5 | 15.5 | 0    | 2     |
| 4831.355                  | 38.5 | 38.5 | 0    | 2     | 4976.765                  | 6.5  | 7.5  | 0    | 2     |
| 4832.786                  | 52.5 | 51.5 | 0    | 2     | 4979.018                  | 21.5 | 21.5 | 0    | 2     |
| 4833.317                  | 27.5 | 28.5 | 0    | 2     | 4984.054                  | 22.5 | 22.5 | 0    | 2     |

Table S6 (continued)

| $\nu$ (cm <sup>-1</sup> ) | J'   | J''  | $\nu'$ | $\nu''$ | $\nu$ (cm <sup>-1</sup> ) | J'   | J''  | $\nu'$ | $\nu''$ |
|---------------------------|------|------|--------|---------|---------------------------|------|------|--------|---------|
| 4984.945                  | 10.5 | 11.5 | 0      | 2       | 5043.585                  | 12.5 | 12.5 | 0      | 2       |
| 4985.032                  | 10.5 | 10.5 | 0      | 2       | 5044.416                  | 25.5 | 24.5 | 0      | 2       |
| 4990.928                  | 9.5  | 9.5  | 0      | 2       | 5044.497                  | 3.5  | 2.5  | 0      | 2       |
| 4991.055                  | 21.5 | 22.5 | 0      | 2       | 5047.193                  | 27.5 | 27.5 | 0      | 2       |
| 4991.215                  | 21.5 | 21.5 | 0      | 2       | 5048.032                  | 11.5 | 12.5 | 0      | 2       |
| 4991.734                  | 12.5 | 13.5 | 0      | 2       | 5048.265                  | 4.5  | 3.5  | 0      | 2       |
| 4992.631                  | 4.5  | 5.5  | 0      | 2       | 5051.158                  | 4.5  | 5.5  | 0      | 2       |
| 4995.880                  | 18.5 | 17.5 | 0      | 2       | 5052.114                  | 26.5 | 26.5 | 0      | 2       |
| 4996.471                  | 8.5  | 8.5  | 0      | 2       | 5052.417                  | 10.5 | 10.5 | 0      | 2       |
| 4998.090                  | 20.5 | 20.5 | 0      | 2       | 5054.002                  | 22.5 | 21.5 | 0      | 2       |
| 4998.685                  | 34.5 | 33.5 | 0      | 2       | 5056.475                  | 9.5  | 9.5  | 0      | 2       |
| 4999.972                  | 11.5 | 12.5 | 0      | 2       | 5056.558                  | 21.5 | 20.5 | 0      | 2       |
| 5000.673                  | 17.5 | 17.5 | 0      | 2       | 5056.921                  | 25.5 | 24.5 | 0      | 2       |
| 5000.808                  | 17.5 | 16.5 | 0      | 2       | 5057.603                  | 3.5  | 4.5  | 0      | 2       |
| 5001.497                  | 54.5 | 53.5 | 0      | 2       | 5060.302                  | 8.5  | 8.5  | 0      | 2       |
| 5001.644                  | 7.5  | 7.5  | 0      | 2       | 5060.710                  | 19.5 | 18.5 | 0      | 2       |
| 5004.703                  | 34.5 | 34.5 | 0      | 2       | 5061.265                  | 24.5 | 23.5 | 0      | 2       |
| 5006.952                  | 2.5  | 3.5  | 0      | 2       | 5061.349                  | 9.5  | 8.5  | 0      | 2       |
| 5007.968                  | 10.5 | 11.5 | 0      | 2       | 5063.903                  | 7.5  | 7.5  | 0      | 2       |
| 5010.860                  | 5.5  | 5.5  | 0      | 2       | 5063.996                  | 11.5 | 10.5 | 0      | 2       |
| 5011.045                  | 18.5 | 18.5 | 0      | 2       | 5064.471                  | 16.5 | 15.5 | 0      | 2       |
| 5014.889                  | 4.5  | 4.5  | 0      | 2       | 5065.222                  | 13.5 | 12.5 | 0      | 2       |
| 5015.726                  | 9.5  | 10.5 | 0      | 2       | 5065.313                  | 14.5 | 13.5 | 0      | 2       |
| 5016.987                  | 17.5 | 18.5 | 0      | 2       | 5067.281                  | 6.5  | 6.5  | 0      | 2       |
| 5018.297                  | 32.5 | 32.5 | 0      | 2       | 5068.931                  | 22.5 | 22.5 | 0      | 2       |
| 5018.528                  | 3.5  | 3.5  | 0      | 2       | 5070.440                  | 5.5  | 5.5  | 0      | 2       |
| 5021.778                  | 2.5  | 3.5  | 0      | 2       | 5073.391                  | 4.5  | 4.5  | 0      | 2       |
| 5022.122                  | 30.5 | 29.5 | 0      | 2       | 5075.805                  | 20.5 | 19.5 | 0      | 2       |
| 5023.232                  | 11.5 | 11.5 | 0      | 2       | 5076.131                  | 3.5  | 3.5  | 0      | 2       |
| 5023.320                  | 11.5 | 10.5 | 0      | 2       | 5078.667                  | 2.5  | 3.5  | 0      | 2       |
| 5024.640                  | 1.5  | 2.5  | 0      | 2       | 5078.747                  | 19.5 | 18.5 | 0      | 2       |
| 5025.861                  | 10.5 | 9.5  | 0      | 2       | 5081.012                  | 1.5  | 2.5  | 0      | 2       |
| 5028.055                  | 9.5  | 8.5  | 0      | 2       | 5081.284                  | 18.5 | 18.5 | 0      | 2       |
| 5028.476                  | 15.5 | 15.5 | 0      | 2       | 5081.415                  | 18.5 | 17.5 | 0      | 2       |
| 5030.721                  | 30.5 | 30.5 | 0      | 2       | 5086.951                  | 0.5  | 0.5  | 0      | 2       |
| 5033.427                  | 4.5  | 4.5  | 0      | 2       | 5088.442                  | 1.5  | 1.5  | 0      | 2       |
| 5033.655                  | 14.5 | 15.5 | 0      | 2       | 5090.987                  | 3.5  | 3.5  | 0      | 2       |
| 5033.772                  | 14.5 | 14.5 | 0      | 2       | 5091.956                  | 4.5  | 4.5  | 0      | 2       |
| 5036.439                  | 27.5 | 26.5 | 0      | 2       | 5092.746                  | 5.5  | 4.5  | 0      | 2       |
| 5037.637                  | 6.5  | 7.5  | 0      | 2       | 5093.553                  | 9.5  | 9.5  | 0      | 2       |
| 5038.801                  | 13.5 | 13.5 | 0      | 2       | 5093.625                  | 9.5  | 8.5  | 0      | 2       |
| 5040.331                  | 2.5  | 1.5  | 0      | 2       | 5093.689                  | 8.5  | 8.5  | 0      | 2       |
| 5040.584                  | 26.5 | 25.5 | 0      | 2       | 5102.092                  | 3.5  | 2.5  | 0      | 2       |

Table S6 (continued)

| $\nu$ (cm <sup>-1</sup> ) | J'   | J''  | $\nu'$ | $\nu''$ | $\nu$ (cm <sup>-1</sup> ) | J'   | J''  | $\nu'$ | $\nu''$ |
|---------------------------|------|------|--------|---------|---------------------------|------|------|--------|---------|
| 5106.763                  | 4.5  | 3.5  | 0      | 2       | 4777.023                  | 11.5 | 12.5 | 1      | 3       |
| 5109.231                  | 39.5 | 38.5 | 0      | 2       | 4777.112                  | 11.5 | 11.5 | 1      | 3       |
| 5115.479                  | 6.5  | 5.5  | 0      | 2       | 4782.094                  | 36.5 | 35.5 | 1      | 3       |
| 5119.514                  | 7.5  | 6.5  | 0      | 2       | 4783.251                  | 10.5 | 11.5 | 1      | 3       |
| 5123.317                  | 8.5  | 7.5  | 0      | 2       | 4783.333                  | 10.5 | 10.5 | 1      | 3       |
| 5126.906                  | 9.5  | 8.5  | 0      | 2       | 4789.194                  | 9.5  | 9.5  | 1      | 3       |
| 5130.243                  | 10.5 | 9.5  | 0      | 2       | 4789.319                  | 21.5 | 21.5 | 1      | 3       |
| 5133.351                  | 11.5 | 10.5 | 0      | 2       | 4794.699                  | 8.5  | 8.5  | 1      | 3       |
| 5136.436                  | 32.5 | 31.5 | 0      | 2       | 4798.639                  | 17.5 | 17.5 | 1      | 3       |
| 5145.086                  | 16.5 | 15.5 | 0      | 2       | 4802.653                  | 19.5 | 20.5 | 1      | 3       |
| 5149.717                  | 20.5 | 19.5 | 0      | 2       | 4803.231                  | 16.5 | 16.5 | 1      | 3       |
| 5150.273                  | 23.5 | 22.5 | 0      | 2       | 4808.067                  | 32.5 | 31.5 | 1      | 3       |
| 4463.941                  | 31.5 | 32.5 | 1      | 3       | 4808.990                  | 18.5 | 19.5 | 1      | 3       |
| 4468.423                  | 39.5 | 40.5 | 1      | 3       | 4809.123                  | 18.5 | 18.5 | 1      | 3       |
| 4501.748                  | 37.5 | 38.5 | 1      | 3       | 4811.418                  | 14.5 | 14.5 | 1      | 3       |
| 4528.821                  | 35.5 | 36.5 | 1      | 3       | 4812.993                  | 4.5  | 4.5  | 1      | 3       |
| 4544.316                  | 34.5 | 34.5 | 1      | 3       | 4814.110                  | 9.5  | 10.5 | 1      | 3       |
| 4557.584                  | 33.5 | 34.5 | 1      | 3       | 4815.190                  | 17.5 | 17.5 | 1      | 3       |
| 4557.829                  | 33.5 | 33.5 | 1      | 3       | 4816.603                  | 3.5  | 3.5  | 1      | 3       |
| 4570.799                  | 32.5 | 33.5 | 1      | 3       | 4818.253                  | 12.5 | 12.5 | 1      | 3       |
| 4596.332                  | 30.5 | 31.5 | 1      | 3       | 4818.342                  | 12.5 | 11.5 | 1      | 3       |
| 4625.454                  | 20.5 | 21.5 | 1      | 3       | 4819.829                  | 2.5  | 2.5  | 1      | 3       |
| 4629.725                  | 38.5 | 38.5 | 1      | 3       | 4821.156                  | 11.5 | 11.5 | 1      | 3       |
| 4648.346                  | 26.5 | 27.5 | 1      | 3       | 4821.238                  | 11.5 | 10.5 | 1      | 3       |
| 4651.467                  | 36.5 | 36.5 | 1      | 3       | 4821.601                  | 8.5  | 9.5  | 1      | 3       |
| 4663.035                  | 17.5 | 18.5 | 1      | 3       | 4822.665                  | 1.5  | 2.5  | 1      | 3       |
| 4674.928                  | 16.5 | 17.5 | 1      | 3       | 4823.704                  | 10.5 | 10.5 | 1      | 3       |
| 4691.673                  | 32.5 | 32.5 | 1      | 3       | 4823.784                  | 10.5 | 9.5  | 1      | 3       |
| 4705.038                  | 21.5 | 22.5 | 1      | 3       | 4825.895                  | 9.5  | 9.5  | 1      | 3       |
| 4708.629                  | 13.5 | 14.5 | 1      | 3       | 4826.526                  | 15.5 | 15.5 | 1      | 3       |
| 4709.959                  | 30.5 | 30.5 | 1      | 3       | 4830.850                  | 2.5  | 2.5  | 1      | 3       |
| 4710.176                  | 30.5 | 29.5 | 1      | 3       | 4831.288                  | 3.5  | 3.5  | 1      | 3       |
| 4714.988                  | 19.5 | 20.5 | 1      | 3       | 4831.811                  | 14.5 | 14.5 | 1      | 3       |
| 4715.138                  | 19.5 | 19.5 | 1      | 3       | 4833.693                  | 1.5  | 0.5  | 1      | 3       |
| 4715.555                  | 20.5 | 21.5 | 1      | 3       | 4835.891                  | 6.5  | 7.5  | 1      | 3       |
| 4740.869                  | 16.5 | 16.5 | 1      | 3       | 4836.833                  | 13.5 | 13.5 | 1      | 3       |
| 4754.974                  | 16.5 | 17.5 | 1      | 3       | 4837.741                  | 26.5 | 25.5 | 1      | 3       |
| 4757.470                  | 24.5 | 24.5 | 1      | 3       | 4838.203                  | 2.5  | 1.5  | 1      | 3       |
| 4764.310                  | 23.5 | 23.5 | 1      | 3       | 4839.161                  | 28.5 | 28.5 | 1      | 3       |
| 4767.051                  | 24.5 | 24.5 | 1      | 3       | 4841.608                  | 12.5 | 12.5 | 1      | 3       |
| 4770.825                  | 22.5 | 22.5 | 1      | 3       | 4842.320                  | 3.5  | 2.5  | 1      | 3       |
| 4773.116                  | 14.5 | 15.5 | 1      | 3       | 4842.709                  | 5.5  | 6.5  | 1      | 3       |
| 4775.207                  | 6.5  | 7.5  | 1      | 3       | 4844.389                  | 27.5 | 27.5 | 1      | 3       |

Table S6 (continued)

| $\nu$ (cm <sup>-1</sup> ) | J'   | J''  | $\nu'$ | $\nu''$ | $\nu$ (cm <sup>-1</sup> ) | J'   | J''  | $\nu'$ | $\nu''$ |
|---------------------------|------|------|--------|---------|---------------------------|------|------|--------|---------|
| 4849.313                  | 4.5  | 5.5  | 1      | 3       | 4566.094                  | 7.5  | 8.5  | 2      | 4       |
| 4858.233                  | 8.5  | 9.5  | 1      | 3       | 4569.641                  | 12.5 | 13.5 | 2      | 4       |
| 4861.540                  | 11.5 | 10.5 | 1      | 3       | 4569.735                  | 12.5 | 12.5 | 2      | 4       |
| 4861.883                  | 7.5  | 7.5  | 1      | 3       | 4572.521                  | 14.5 | 15.5 | 2      | 4       |
| 4862.300                  | 12.5 | 11.5 | 1      | 3       | 4573.525                  | 23.5 | 24.5 | 2      | 4       |
| 4862.488                  | 15.5 | 14.5 | 1      | 3       | 4576.258                  | 11.5 | 11.5 | 2      | 4       |
| 4862.702                  | 13.5 | 12.5 | 1      | 3       | 4581.167                  | 13.5 | 14.5 | 2      | 4       |
| 4865.255                  | 6.5  | 6.5  | 1      | 3       | 4581.715                  | 20.5 | 20.5 | 2      | 4       |
| 4866.400                  | 22.5 | 21.5 | 1      | 3       | 4581.855                  | 20.5 | 19.5 | 2      | 4       |
| 4868.403                  | 5.5  | 5.5  | 1      | 3       | 4582.441                  | 10.5 | 10.5 | 2      | 4       |
| 4869.923                  | 21.5 | 20.5 | 1      | 3       | 4588.266                  | 9.5  | 9.5  | 2      | 4       |
| 4871.339                  | 4.5  | 5.5  | 1      | 3       | 4589.567                  | 12.5 | 13.5 | 2      | 4       |
| 4873.161                  | 20.5 | 19.5 | 1      | 3       | 4592.637                  | 18.5 | 17.5 | 2      | 4       |
| 4876.125                  | 19.5 | 18.5 | 1      | 3       | 4593.738                  | 8.5  | 8.5  | 2      | 4       |
| 4881.124                  | 17.5 | 17.5 | 1      | 3       | 4597.279                  | 3.5  | 4.5  | 2      | 4       |
| 4881.242                  | 17.5 | 16.5 | 1      | 3       | 4597.534                  | 17.5 | 16.5 | 2      | 4       |
| 4886.281                  | 1.5  | 0.5  | 1      | 3       | 4598.837                  | 7.5  | 7.5  | 2      | 4       |
| 4888.781                  | 3.5  | 3.5  | 1      | 3       | 4601.541                  | 19.5 | 20.5 | 2      | 4       |
| 4891.024                  | 6.5  | 5.5  | 1      | 3       | 4603.567                  | 6.5  | 6.5  | 2      | 4       |
| 4891.268                  | 9.5  | 8.5  | 1      | 3       | 4604.131                  | 2.5  | 3.5  | 2      | 4       |
| 4891.420                  | 8.5  | 7.5  | 1      | 3       | 4607.923                  | 5.5  | 5.5  | 2      | 4       |
| 4904.836                  | 39.5 | 38.5 | 1      | 3       | 4610.162                  | 14.5 | 14.5 | 2      | 4       |
| 4927.519                  | 10.5 | 9.5  | 1      | 3       | 4611.898                  | 4.5  | 4.5  | 2      | 4       |
| 4933.352                  | 12.5 | 11.5 | 1      | 3       | 4618.670                  | 2.5  | 3.5  | 2      | 4       |
| 4946.784                  | 21.5 | 20.5 | 1      | 3       | 4619.965                  | 11.5 | 10.5 | 2      | 4       |
| 4412.692                  | 21.5 | 22.5 | 2      | 4       | 4621.487                  | 1.5  | 2.5  | 2      | 4       |
| 4463.117                  | 17.5 | 18.5 | 2      | 4       | 4622.503                  | 10.5 | 9.5  | 2      | 4       |
| 4465.421                  | 24.5 | 25.5 | 2      | 4       | 4624.691                  | 9.5  | 8.5  | 2      | 4       |
| 4485.982                  | 22.5 | 23.5 | 2      | 4       | 4625.376                  | 15.5 | 15.5 | 2      | 4       |
| 4486.150                  | 22.5 | 22.5 | 2      | 4       | 4627.972                  | 7.5  | 6.5  | 2      | 4       |
| 4494.012                  | 22.5 | 23.5 | 2      | 4       | 4630.074                  | 4.5  | 4.5  | 2      | 4       |
| 4504.753                  | 21.5 | 22.5 | 2      | 4       | 4632.417                  | 1.5  | 0.5  | 2      | 4       |
| 4505.297                  | 20.5 | 21.5 | 2      | 4       | 4635.667                  | 13.5 | 13.5 | 2      | 4       |
| 4514.488                  | 19.5 | 20.5 | 2      | 4       | 4639.581                  | 25.5 | 24.5 | 2      | 4       |
| 4523.344                  | 18.5 | 19.5 | 2      | 4       | 4640.346                  | 12.5 | 13.5 | 2      | 4       |
| 4525.444                  | 19.5 | 20.5 | 2      | 4       | 4641.716                  | 5.5  | 6.5  | 2      | 4       |
| 4532.014                  | 17.5 | 17.5 | 2      | 4       | 4644.868                  | 11.5 | 12.5 | 2      | 4       |
| 4535.375                  | 18.5 | 19.5 | 2      | 4       | 4646.382                  | 23.5 | 22.5 | 2      | 4       |
| 4540.220                  | 16.5 | 16.5 | 2      | 4       | 4651.907                  | 21.5 | 20.5 | 2      | 4       |
| 4548.107                  | 15.5 | 15.5 | 2      | 4       | 4652.032                  | 25.5 | 25.5 | 2      | 4       |
| 4548.274                  | 9.5  | 10.5 | 2      | 4       | 4653.393                  | 7.5  | 6.5  | 2      | 4       |
| 4555.659                  | 14.5 | 14.5 | 2      | 4       | 4654.186                  | 20.5 | 19.5 | 2      | 4       |
| 4563.144                  | 23.5 | 23.5 | 2      | 4       | 4655.555                  | 8.5  | 7.5  | 2      | 4       |

Table S6 (continued)

| $\nu$ (cm <sup>-1</sup> ) | J'   | J''  | $\nu'$ | $\nu''$ | $\nu$ (cm <sup>-1</sup> ) | J'   | J''  | $\nu'$ | $\nu''$ |
|---------------------------|------|------|--------|---------|---------------------------|------|------|--------|---------|
| 4656.154                  | 19.5 | 18.5 | 2      | 4       | 4249.108                  | 26.5 | 27.5 | 3      | 5       |
| 4657.356                  | 9.5  | 8.5  | 2      | 4       | 4264.027                  | 17.5 | 18.5 | 3      | 5       |
| 4660.663                  | 7.5  | 7.5  | 2      | 4       | 4266.166                  | 24.5 | 24.5 | 3      | 5       |
| 4660.791                  | 2.5  | 3.5  | 2      | 4       | 4276.390                  | 23.5 | 24.5 | 3      | 5       |
| 4664.020                  | 6.5  | 6.5  | 2      | 4       | 4281.154                  | 33.5 | 32.5 | 3      | 5       |
| 4666.732                  | 1.5  | 2.5  | 2      | 4       | 4283.643                  | 23.5 | 24.5 | 3      | 5       |
| 4667.161                  | 5.5  | 5.5  | 2      | 4       | 4284.192                  | 33.5 | 33.5 | 3      | 5       |
| 4667.906                  | 21.5 | 21.5 | 2      | 4       | 4286.461                  | 22.5 | 23.5 | 3      | 5       |
| 4670.090                  | 4.5  | 4.5  | 2      | 4       | 4304.079                  | 31.5 | 32.5 | 3      | 5       |
| 4671.321                  | 20.5 | 19.5 | 2      | 4       | 4305.687                  | 20.5 | 21.5 | 3      | 5       |
| 4674.179                  | 19.5 | 19.5 | 2      | 4       | 4308.699                  | 30.5 | 30.5 | 3      | 5       |
| 4674.313                  | 19.5 | 18.5 | 2      | 4       | 4308.973                  | 13.5 | 14.5 | 3      | 5       |
| 4675.315                  | 2.5  | 3.5  | 2      | 4       | 4312.701                  | 44.5 | 43.5 | 3      | 5       |
| 4683.576                  | 15.5 | 14.5 | 2      | 4       | 4313.928                  | 30.5 | 30.5 | 3      | 5       |
| 4685.231                  | 14.5 | 13.5 | 2      | 4       | 4314.952                  | 19.5 | 19.5 | 3      | 5       |
| 4686.534                  | 13.5 | 13.5 | 2      | 4       | 4315.752                  | 20.5 | 21.5 | 3      | 5       |
| 4688.298                  | 4.5  | 4.5  | 2      | 4       | 4323.629                  | 18.5 | 19.5 | 3      | 5       |
| 4689.544                  | 6.5  | 5.5  | 2      | 4       | 4323.762                  | 18.5 | 18.5 | 3      | 5       |
| 4689.830                  | 8.5  | 8.5  | 2      | 4       | 4329.465                  | 11.5 | 12.5 | 3      | 5       |
| 4707.182                  | 5.5  | 4.5  | 2      | 4       | 4330.240                  | 42.5 | 41.5 | 3      | 5       |
| 4725.585                  | 10.5 | 9.5  | 2      | 4       | 4332.124                  | 17.5 | 18.5 | 3      | 5       |
| 3995.269                  | 44.5 | 45.5 | 3      | 5       | 4332.256                  | 17.5 | 17.5 | 3      | 5       |
| 4011.897                  | 43.5 | 43.5 | 3      | 5       | 4333.748                  | 27.5 | 27.5 | 3      | 5       |
| 4034.413                  | 33.5 | 34.5 | 3      | 5       | 4335.803                  | 18.5 | 19.5 | 3      | 5       |
| 4067.299                  | 31.5 | 32.5 | 3      | 5       | 4340.297                  | 16.5 | 17.5 | 3      | 5       |
| 4070.575                  | 39.5 | 40.5 | 3      | 5       | 4340.929                  | 27.5 | 28.5 | 3      | 5       |
| 4083.304                  | 30.5 | 31.5 | 3      | 5       | 4345.437                  | 17.5 | 18.5 | 3      | 5       |
| 4089.126                  | 38.5 | 38.5 | 3      | 5       | 4348.138                  | 15.5 | 16.5 | 3      | 5       |
| 4101.107                  | 37.5 | 38.5 | 3      | 5       | 4348.903                  | 25.5 | 25.5 | 3      | 5       |
| 4103.697                  | 37.5 | 37.5 | 3      | 5       | 4350.559                  | 40.5 | 39.5 | 3      | 5       |
| 4114.433                  | 28.5 | 29.5 | 3      | 5       | 4355.651                  | 14.5 | 15.5 | 3      | 5       |
| 4130.524                  | 35.5 | 36.5 | 3      | 5       | 4357.851                  | 25.5 | 25.5 | 3      | 5       |
| 4142.945                  | 45.5 | 45.5 | 3      | 5       | 4362.831                  | 13.5 | 14.5 | 3      | 5       |
| 4145.431                  | 34.5 | 35.5 | 3      | 5       | 4363.906                  | 15.5 | 16.5 | 3      | 5       |
| 4145.671                  | 34.5 | 34.5 | 3      | 5       | 4365.796                  | 24.5 | 24.5 | 3      | 5       |
| 4169.189                  | 43.5 | 42.5 | 3      | 5       | 4366.243                  | 7.5  | 8.5  | 3      | 5       |
| 4179.652                  | 42.5 | 42.5 | 3      | 5       | 4369.662                  | 12.5 | 13.5 | 3      | 5       |
| 4209.480                  | 29.5 | 30.5 | 3      | 5       | 4372.761                  | 14.5 | 15.5 | 3      | 5       |
| 4216.792                  | 39.5 | 40.5 | 3      | 5       | 4375.498                  | 21.5 | 21.5 | 3      | 5       |
| 4217.058                  | 39.5 | 39.5 | 3      | 5       | 4375.640                  | 21.5 | 20.5 | 3      | 5       |
| 4224.704                  | 28.5 | 29.5 | 3      | 5       | 4376.158                  | 11.5 | 12.5 | 3      | 5       |
| 4228.628                  | 38.5 | 38.5 | 3      | 5       | 4380.861                  | 22.5 | 22.5 | 3      | 5       |
| 4240.324                  | 37.5 | 38.5 | 3      | 5       | 4381.357                  | 20.5 | 20.5 | 3      | 5       |



Table S6 (continued)

| $\nu$ (cm <sup>-1</sup> ) | J'   | J''  | $\nu'$ | $\nu''$ | $\nu$ (cm <sup>-1</sup> ) | J'   | J''  | $\nu'$ | $\nu''$ |
|---------------------------|------|------|--------|---------|---------------------------|------|------|--------|---------|
| 4381.498                  | 20.5 | 19.5 | 3      | 5       | 4435.333                  | 13.5 | 13.5 | 3      | 5       |
| 4382.300                  | 10.5 | 11.5 | 3      | 5       | 4436.385                  | 2.5  | 1.5  | 3      | 5       |
| 4382.381                  | 10.5 | 10.5 | 3      | 5       | 4440.413                  | 3.5  | 2.5  | 3      | 5       |
| 4383.487                  | 36.5 | 36.5 | 3      | 5       | 4441.428                  | 27.5 | 26.5 | 3      | 5       |
| 4387.032                  | 19.5 | 18.5 | 3      | 5       | 4444.518                  | 11.5 | 12.5 | 3      | 5       |
| 4388.100                  | 9.5  | 10.5 | 3      | 5       | 4444.602                  | 11.5 | 11.5 | 3      | 5       |
| 4389.718                  | 12.5 | 13.5 | 3      | 5       | 4445.242                  | 23.5 | 22.5 | 3      | 5       |
| 4390.009                  | 4.5  | 5.5  | 3      | 5       | 4447.313                  | 5.5  | 4.5  | 3      | 5       |
| 4392.121                  | 18.5 | 18.5 | 3      | 5       | 4448.192                  | 22.5 | 21.5 | 3      | 5       |
| 4393.600                  | 8.5  | 8.5  | 3      | 5       | 4450.190                  | 6.5  | 5.5  | 3      | 5       |
| 4394.837                  | 20.5 | 20.5 | 3      | 5       | 4450.815                  | 21.5 | 20.5 | 3      | 5       |
| 4397.022                  | 17.5 | 17.5 | 3      | 5       | 4450.908                  | 25.5 | 25.5 | 3      | 5       |
| 4397.822                  | 11.5 | 12.5 | 3      | 5       | 4452.906                  | 9.5  | 9.5  | 3      | 5       |
| 4398.670                  | 7.5  | 7.5  | 3      | 5       | 4455.102                  | 19.5 | 18.5 | 3      | 5       |
| 4401.273                  | 19.5 | 20.5 | 3      | 5       | 4456.636                  | 8.5  | 9.5  | 3      | 5       |
| 4401.413                  | 19.5 | 19.5 | 3      | 5       | 4456.701                  | 8.5  | 8.5  | 3      | 5       |
| 4401.595                  | 16.5 | 16.5 | 3      | 5       | 4457.991                  | 10.5 | 9.5  | 3      | 5       |
| 4403.369                  | 6.5  | 6.5  | 3      | 5       | 4458.096                  | 17.5 | 16.5 | 3      | 5       |
| 4403.957                  | 2.5  | 3.5  | 3      | 5       | 4459.747                  | 12.5 | 11.5 | 3      | 5       |
| 4405.560                  | 33.5 | 32.5 | 3      | 5       | 4460.089                  | 13.5 | 12.5 | 3      | 5       |
| 4405.838                  | 15.5 | 15.5 | 3      | 5       | 4460.281                  | 7.5  | 7.5  | 3      | 5       |
| 4409.746                  | 14.5 | 14.5 | 3      | 5       | 4463.631                  | 6.5  | 6.5  | 3      | 5       |
| 4411.634                  | 4.5  | 4.5  | 3      | 5       | 4466.382                  | 1.5  | 2.5  | 3      | 5       |
| 4413.319                  | 13.5 | 13.5 | 3      | 5       | 4469.667                  | 4.5  | 4.5  | 3      | 5       |
| 4413.769                  | 17.5 | 17.5 | 3      | 5       | 4472.376                  | 3.5  | 3.5  | 3      | 5       |
| 4415.163                  | 3.5  | 4.5  | 3      | 5       | 4474.869                  | 2.5  | 3.5  | 3      | 5       |
| 4416.551                  | 12.5 | 12.5 | 3      | 5       | 4475.859                  | 43.5 | 42.5 | 3      | 5       |
| 4418.369                  | 2.5  | 2.5  | 3      | 5       | 4477.176                  | 1.5  | 2.5  | 3      | 5       |
| 4419.544                  | 16.5 | 16.5 | 3      | 5       | 4480.756                  | 16.5 | 15.5 | 3      | 5       |
| 4420.716                  | 8.5  | 9.5  | 3      | 5       | 4481.980                  | 42.5 | 41.5 | 3      | 5       |
| 4421.155                  | 1.5  | 1.5  | 3      | 5       | 4482.696                  | 15.5 | 14.5 | 3      | 5       |
| 4421.980                  | 10.5 | 10.5 | 3      | 5       | 4484.375                  | 14.5 | 13.5 | 3      | 5       |
| 4422.053                  | 10.5 | 9.5  | 3      | 5       | 4485.796                  | 13.5 | 12.5 | 3      | 5       |
| 4424.238                  | 9.5  | 8.5  | 3      | 5       | 4486.809                  | 3.5  | 3.5  | 3      | 5       |
| 4424.786                  | 30.5 | 29.5 | 3      | 5       | 4486.885                  | 12.5 | 12.5 | 3      | 5       |
| 4425.784                  | 28.5 | 27.5 | 3      | 5       | 4487.807                  | 11.5 | 11.5 | 3      | 5       |
| 4427.882                  | 7.5  | 8.5  | 3      | 5       | 4487.989                  | 1.5  | 0.5  | 3      | 5       |
| 4428.362                  | 1.5  | 0.5  | 3      | 5       | 4488.486                  | 10.5 | 10.5 | 3      | 5       |
| 4429.176                  | 2.5  | 2.5  | 3      | 5       | 4488.558                  | 10.5 | 9.5  | 3      | 5       |
| 4429.293                  | 5.5  | 5.5  | 3      | 5       | 4488.908                  | 6.5  | 5.5  | 3      | 5       |
| 4429.617                  | 3.5  | 2.5  | 3      | 5       | 4488.991                  | 9.5  | 8.5  | 3      | 5       |
| 4430.329                  | 14.5 | 14.5 | 3      | 5       | 4489.187                  | 8.5  | 7.5  | 3      | 5       |
| 4434.826                  | 6.5  | 7.5  | 3      | 5       | 4497.601                  | 3.5  | 2.5  | 3      | 5       |

Table S6 (continued)

| $\nu$ (cm <sup>-1</sup> ) | J'   | J''  | $\nu'$ | $\nu''$ | $\nu$ (cm <sup>-1</sup> ) | J'   | J''  | $\nu'$ | $\nu''$ |
|---------------------------|------|------|--------|---------|---------------------------|------|------|--------|---------|
| 4508.112                  | 37.5 | 36.5 | 3      | 5       | 4163.858                  | 13.5 | 13.5 | 4      | 6       |
| 4517.937                  | 8.5  | 7.5  | 3      | 5       | 4165.068                  | 15.5 | 16.5 | 4      | 6       |
| 4534.665                  | 14.5 | 13.5 | 3      | 5       | 4166.465                  | 24.5 | 24.5 | 4      | 6       |
| 4541.567                  | 19.5 | 18.5 | 3      | 5       | 4167.013                  | 38.5 | 38.5 | 4      | 6       |
| 3994.603                  | 41.5 | 41.5 | 4      | 6       | 4167.255                  | 7.5  | 8.5  | 4      | 6       |
| 3994.882                  | 41.5 | 40.5 | 4      | 6       | 4169.860                  | 22.5 | 22.5 | 4      | 6       |
| 3997.024                  | 54.5 | 53.5 | 4      | 6       | 4170.558                  | 12.5 | 13.5 | 4      | 6       |
| 4000.622                  | 54.5 | 53.5 | 4      | 6       | 4170.732                  | 37.5 | 36.5 | 4      | 6       |
| 4006.536                  | 40.5 | 40.5 | 4      | 6       | 4176.164                  | 21.5 | 20.5 | 4      | 6       |
| 4022.035                  | 52.5 | 52.5 | 4      | 6       | 4182.429                  | 13.5 | 14.5 | 4      | 6       |
| 4026.485                  | 28.5 | 29.5 | 4      | 6       | 4183.336                  | 5.5  | 6.5  | 4      | 6       |
| 4038.772                  | 27.5 | 28.5 | 4      | 6       | 4185.031                  | 35.5 | 34.5 | 4      | 6       |
| 4046.251                  | 50.5 | 50.5 | 4      | 6       | 4188.465                  | 21.5 | 22.5 | 4      | 6       |
| 4051.489                  | 36.5 | 35.5 | 4      | 6       | 4188.871                  | 9.5  | 10.5 | 4      | 6       |
| 4057.924                  | 49.5 | 49.5 | 4      | 6       | 4188.942                  | 9.5  | 9.5  | 4      | 6       |
| 4065.806                  | 17.5 | 18.5 | 4      | 6       | 4190.818                  | 4.5  | 5.5  | 4      | 6       |
| 4067.618                  | 24.5 | 24.5 | 4      | 6       | 4190.876                  | 35.5 | 34.5 | 4      | 6       |
| 4074.327                  | 34.5 | 35.5 | 4      | 6       | 4194.276                  | 8.5  | 9.5  | 4      | 6       |
| 4074.554                  | 34.5 | 34.5 | 4      | 6       | 4194.335                  | 8.5  | 8.5  | 4      | 6       |
| 4077.787                  | 23.5 | 24.5 | 4      | 6       | 4195.778                  | 53.5 | 52.5 | 4      | 6       |
| 4080.373                  | 47.5 | 47.5 | 4      | 6       | 4197.919                  | 3.5  | 4.5  | 4      | 6       |
| 4087.970                  | 22.5 | 22.5 | 4      | 6       | 4201.883                  | 19.5 | 20.5 | 4      | 6       |
| 4091.175                  | 46.5 | 46.5 | 4      | 6       | 4202.058                  | 16.5 | 16.5 | 4      | 6       |
| 4091.439                  | 46.5 | 45.5 | 4      | 6       | 4204.950                  | 33.5 | 33.5 | 4      | 6       |
| 4096.104                  | 22.5 | 23.5 | 4      | 6       | 4209.952                  | 31.5 | 30.5 | 4      | 6       |
| 4101.456                  | 45.5 | 44.5 | 4      | 6       | 4211.886                  | 32.5 | 31.5 | 4      | 6       |
| 4106.758                  | 21.5 | 22.5 | 4      | 6       | 4213.763                  | 13.5 | 13.5 | 4      | 6       |
| 4109.577                  | 30.5 | 29.5 | 4      | 6       | 4214.227                  | 17.5 | 18.5 | 4      | 6       |
| 4114.698                  | 30.5 | 30.5 | 4      | 6       | 4215.422                  | 30.5 | 29.5 | 4      | 6       |
| 4122.068                  | 43.5 | 42.5 | 4      | 6       | 4216.988                  | 12.5 | 12.5 | 4      | 6       |
| 4126.335                  | 28.5 | 28.5 | 4      | 6       | 4218.096                  | 31.5 | 31.5 | 4      | 6       |
| 4129.690                  | 42.5 | 41.5 | 4      | 6       | 4218.301                  | 31.5 | 30.5 | 4      | 6       |
| 4131.704                  | 42.5 | 41.5 | 4      | 6       | 4218.912                  | 2.5  | 2.5  | 4      | 6       |
| 4132.879                  | 28.5 | 29.5 | 4      | 6       | 4219.872                  | 11.5 | 11.5 | 4      | 6       |
| 4133.066                  | 28.5 | 28.5 | 4      | 6       | 4219.994                  | 16.5 | 17.5 | 4      | 6       |
| 4140.423                  | 10.5 | 11.5 | 4      | 6       | 4222.405                  | 10.5 | 10.5 | 4      | 6       |
| 4141.027                  | 41.5 | 40.5 | 4      | 6       | 4222.479                  | 10.5 | 9.5  | 4      | 6       |
| 4142.076                  | 26.5 | 26.5 | 4      | 6       | 4224.593                  | 9.5  | 9.5  | 4      | 6       |
| 4149.160                  | 15.5 | 16.5 | 4      | 6       | 4224.650                  | 9.5  | 8.5  | 4      | 6       |
| 4156.633                  | 14.5 | 15.5 | 4      | 6       | 4225.512                  | 15.5 | 16.5 | 4      | 6       |
| 4163.380                  | 23.5 | 23.5 | 4      | 6       | 4226.415                  | 8.5  | 8.5  | 4      | 6       |
| 4163.529                  | 23.5 | 22.5 | 4      | 6       | 4227.881                  | 7.5  | 7.5  | 4      | 6       |
| 4163.767                  | 13.5 | 14.5 | 4      | 6       | 4228.688                  | 7.5  | 8.5  | 4      | 6       |

Table S6 (continued)

| $\nu$ (cm <sup>-1</sup> ) | J'   | J''  | $\nu'$ | $\nu''$ | $\nu$ (cm <sup>-1</sup> ) | J'   | J''  | $\nu'$ | $\nu''$ |
|---------------------------|------|------|--------|---------|---------------------------|------|------|--------|---------|
| 4228.988                  | 6.5  | 6.5  | 4      | 6       | 4289.308                  | 8.5  | 8.5  | 4      | 6       |
| 4229.621                  | 2.5  | 1.5  | 4      | 6       | 4296.706                  | 39.5 | 38.5 | 4      | 6       |
| 4229.710                  | 5.5  | 5.5  | 4      | 6       | 4322.134                  | 33.5 | 32.5 | 4      | 6       |
| 4230.881                  | 14.5 | 14.5 | 4      | 6       | 4337.003                  | 27.5 | 26.5 | 4      | 6       |
| 4232.388                  | 1.5  | 0.5  | 4      | 6       | 4338.951                  | 17.5 | 16.5 | 4      | 6       |
| 4235.582                  | 6.5  | 7.5  | 4      | 6       | 4341.297                  | 20.5 | 19.5 | 4      | 6       |
| 4235.871                  | 13.5 | 13.5 | 4      | 6       | 3988.810                  | 19.5 | 19.5 | 5      | 7       |
| 4238.531                  | 48.5 | 47.5 | 4      | 6       | 3990.010                  | 21.5 | 22.5 | 5      | 7       |
| 4241.691                  | 24.5 | 23.5 | 4      | 6       | 3990.618                  | 9.5  | 9.5  | 5      | 7       |
| 4244.341                  | 4.5  | 3.5  | 4      | 6       | 3992.532                  | 4.5  | 5.5  | 5      | 7       |
| 4245.128                  | 11.5 | 11.5 | 4      | 6       | 3994.000                  | 18.5 | 18.5 | 5      | 7       |
| 4245.951                  | 26.5 | 26.5 | 4      | 6       | 3995.912                  | 8.5  | 9.5  | 5      | 7       |
| 4247.948                  | 22.5 | 21.5 | 4      | 6       | 3996.969                  | 20.5 | 20.5 | 5      | 7       |
| 4248.734                  | 4.5  | 5.5  | 4      | 6       | 3998.599                  | 33.5 | 32.5 | 5      | 7       |
| 4249.387                  | 10.5 | 10.5 | 4      | 6       | 3998.984                  | 17.5 | 16.5 | 5      | 7       |
| 4250.402                  | 6.5  | 5.5  | 4      | 6       | 3999.568                  | 3.5  | 4.5  | 5      | 7       |
| 4253.408                  | 9.5  | 9.5  | 4      | 6       | 4003.426                  | 16.5 | 16.5 | 5      | 7       |
| 4254.965                  | 8.5  | 7.5  | 4      | 6       | 4009.689                  | 18.5 | 19.5 | 5      | 7       |
| 4256.616                  | 18.5 | 17.5 | 4      | 6       | 4009.802                  | 5.5  | 6.5  | 5      | 7       |
| 4256.693                  | 9.5  | 8.5  | 4      | 6       | 4015.099                  | 13.5 | 13.5 | 5      | 7       |
| 4257.199                  | 8.5  | 8.5  | 4      | 6       | 4015.828                  | 17.5 | 17.5 | 5      | 7       |
| 4258.060                  | 10.5 | 9.5  | 4      | 6       | 4016.006                  | 9.5  | 10.5 | 5      | 7       |
| 4259.086                  | 11.5 | 10.5 | 4      | 6       | 4017.207                  | 3.5  | 4.5  | 5      | 7       |
| 4259.687                  | 15.5 | 14.5 | 4      | 6       | 4018.397                  | 12.5 | 11.5 | 5      | 7       |
| 4259.750                  | 12.5 | 11.5 | 4      | 6       | 4021.113                  | 29.5 | 28.5 | 5      | 7       |
| 4260.066                  | 13.5 | 12.5 | 4      | 6       | 4021.191                  | 11.5 | 11.5 | 5      | 7       |
| 4260.762                  | 7.5  | 7.5  | 4      | 6       | 4021.271                  | 11.5 | 10.5 | 5      | 7       |
| 4263.132                  | 22.5 | 22.5 | 4      | 6       | 4023.092                  | 1.5  | 1.5  | 5      | 7       |
| 4263.274                  | 22.5 | 21.5 | 4      | 6       | 4027.731                  | 8.5  | 8.5  | 5      | 7       |
| 4266.893                  | 1.5  | 2.5  | 4      | 6       | 4031.028                  | 5.5  | 5.5  | 5      | 7       |
| 4267.220                  | 5.5  | 5.5  | 4      | 6       | 4031.416                  | 4.5  | 3.5  | 5      | 7       |
| 4270.047                  | 20.5 | 20.5 | 4      | 6       | 4032.325                  | 14.5 | 14.5 | 5      | 7       |
| 4270.122                  | 4.5  | 4.5  | 4      | 6       | 4037.239                  | 6.5  | 7.5  | 5      | 7       |
| 4275.303                  | 2.5  | 2.5  | 4      | 6       | 4042.065                  | 12.5 | 12.5 | 5      | 7       |
| 4277.593                  | 1.5  | 1.5  | 4      | 6       | 4043.880                  | 5.5  | 6.5  | 5      | 7       |
| 4278.367                  | 17.5 | 17.5 | 4      | 6       | 4045.521                  | 4.5  | 3.5  | 5      | 7       |
| 4278.484                  | 17.5 | 16.5 | 4      | 6       | 4046.552                  | 11.5 | 11.5 | 5      | 7       |
| 4280.603                  | 16.5 | 16.5 | 4      | 6       | 4050.293                  | 4.5  | 5.5  | 5      | 7       |
| 4282.683                  | 15.5 | 14.5 | 4      | 6       | 4050.727                  | 10.5 | 11.5 | 5      | 7       |
| 4287.122                  | 3.5  | 2.5  | 4      | 6       | 4050.797                  | 10.5 | 10.5 | 5      | 7       |
| 4287.905                  | 11.5 | 11.5 | 4      | 6       | 4053.633                  | 20.5 | 19.5 | 5      | 7       |
| 4289.076                  | 9.5  | 9.5  | 4      | 6       | 4053.931                  | 7.5  | 6.5  | 5      | 7       |
| 4289.139                  | 9.5  | 8.5  | 4      | 6       | 4054.743                  | 9.5  | 10.5 | 5      | 7       |

Table S6 (continued)

| $\nu$ (cm <sup>-1</sup> ) | J'   | J''  | $\nu'$ | $\nu''$ |
|---------------------------|------|------|--------|---------|
| 4055.653                  | 19.5 | 18.5 | 5      | 7       |
| 4055.992                  | 8.5  | 7.5  | 5      | 7       |
| 4058.592                  | 8.5  | 8.5  | 5      | 7       |
| 4059.025                  | 10.5 | 9.5  | 5      | 7       |
| 4060.658                  | 12.5 | 11.5 | 5      | 7       |
| 4060.900                  | 14.5 | 13.5 | 5      | 7       |
| 4063.997                  | 22.5 | 21.5 | 5      | 7       |
| 4067.478                  | 21.5 | 21.5 | 5      | 7       |
| 4074.008                  | 19.5 | 18.5 | 5      | 7       |
| 4080.964                  | 0.5  | 1.5  | 5      | 7       |
| 4081.577                  | 16.5 | 15.5 | 5      | 7       |
| 4085.217                  | 14.5 | 14.5 | 5      | 7       |
| 4098.884                  | 3.5  | 2.5  | 5      | 7       |
| 4103.264                  | 4.5  | 3.5  | 5      | 7       |
| 4114.103                  | 35.5 | 34.5 | 5      | 7       |
| 4118.614                  | 8.5  | 7.5  | 5      | 7       |
| 4127.717                  | 31.5 | 30.5 | 5      | 7       |
| 4132.572                  | 13.5 | 12.5 | 5      | 7       |
| 4138.190                  | 26.5 | 25.5 | 5      | 7       |
| 4140.183                  | 18.5 | 17.5 | 5      | 7       |

Table S7: Emission lines of the CN radical for  $\Delta v = -1$  of the  $A^2\Pi \rightarrow X^2\Sigma^+$  transition

| $\nu$ (cm <sup>-1</sup> ) | J'   | J''  | $\nu'$ | $\nu''$ | $\nu$ (cm <sup>-1</sup> ) | J'   | J''  | $\nu'$ | $\nu''$ |
|---------------------------|------|------|--------|---------|---------------------------|------|------|--------|---------|
| 6484.045                  | 59.5 | 58.5 | 0      | 1       | 7023.429                  | 31.5 | 31.5 | 0      | 1       |
| 6497.467                  | 48.5 | 48.5 | 0      | 1       | 7027.136                  | 17.5 | 18.5 | 0      | 1       |
| 6516.834                  | 47.5 | 47.5 | 0      | 1       | 7030.587                  | 30.5 | 30.5 | 0      | 1       |
| 6535.876                  | 46.5 | 46.5 | 0      | 1       | 7033.584                  | 16.5 | 17.5 | 0      | 1       |
| 6540.721                  | 56.5 | 56.5 | 0      | 1       | 7034.286                  | 3.5  | 4.5  | 0      | 1       |
| 6554.252                  | 45.5 | 46.5 | 0      | 1       | 7037.141                  | 11.5 | 10.5 | 0      | 1       |
| 6572.662                  | 44.5 | 45.5 | 0      | 1       | 7037.696                  | 2.5  | 3.5  | 0      | 1       |
| 6572.987                  | 44.5 | 44.5 | 0      | 1       | 7049.281                  | 3.5  | 3.5  | 0      | 1       |
| 6612.312                  | 52.5 | 52.5 | 0      | 1       | 7061.508                  | 25.5 | 25.5 | 0      | 1       |
| 6660.013                  | 31.5 | 32.5 | 0      | 1       | 7065.349                  | 21.5 | 20.5 | 0      | 1       |
| 6671.620                  | 38.5 | 39.5 | 0      | 1       | 7066.728                  | 24.5 | 24.5 | 0      | 1       |
| 6676.236                  | 38.5 | 39.5 | 0      | 1       | 7080.639                  | 21.5 | 20.5 | 0      | 1       |
| 6694.775                  | 47.5 | 46.5 | 0      | 1       | 7084.447                  | 20.5 | 20.5 | 0      | 1       |
| 6709.873                  | 46.5 | 46.5 | 0      | 1       | 7108.176                  | 9.5  | 8.5  | 0      | 1       |
| 6719.545                  | 45.5 | 46.5 | 0      | 1       | 7108.350                  | 5.5  | 4.5  | 0      | 1       |
| 6744.837                  | 56.5 | 55.5 | 0      | 1       | 7108.690                  | 6.5  | 5.5  | 0      | 1       |
| 6749.835                  | 43.5 | 44.5 | 0      | 1       | 7108.785                  | 7.5  | 6.5  | 0      | 1       |
| 6778.830                  | 41.5 | 42.5 | 0      | 1       | 7127.004                  | 5.5  | 4.5  | 0      | 1       |
| 6781.849                  | 31.5 | 32.5 | 0      | 1       | 7154.115                  | 14.5 | 13.5 | 0      | 1       |
| 6802.489                  | 52.5 | 51.5 | 0      | 1       | 7159.118                  | 19.5 | 18.5 | 0      | 1       |
| 6821.756                  | 38.5 | 37.5 | 0      | 1       | 6509.645                  | 34.5 | 35.5 | 1      | 2       |
| 6832.959                  | 37.5 | 38.5 | 0      | 1       | 6517.431                  | 26.5 | 27.5 | 1      | 2       |
| 6837.893                  | 27.5 | 28.5 | 0      | 1       | 6536.503                  | 42.5 | 43.5 | 1      | 2       |
| 6842.201                  | 49.5 | 48.5 | 0      | 1       | 6541.139                  | 32.5 | 32.5 | 1      | 2       |
| 6858.361                  | 35.5 | 35.5 | 0      | 1       | 6548.445                  | 24.5 | 25.5 | 1      | 2       |
| 6873.259                  | 17.5 | 18.5 | 0      | 1       | 6564.822                  | 40.5 | 41.5 | 1      | 2       |
| 6888.928                  | 45.5 | 45.5 | 0      | 1       | 6567.760                  | 40.5 | 39.5 | 1      | 2       |
| 6915.557                  | 30.5 | 30.5 | 0      | 1       | 6606.381                  | 20.5 | 21.5 | 1      | 2       |
| 6923.090                  | 42.5 | 41.5 | 0      | 1       | 6630.261                  | 35.5 | 35.5 | 1      | 2       |
| 6932.027                  | 57.5 | 56.5 | 0      | 1       | 6632.565                  | 25.5 | 25.5 | 1      | 2       |
| 6935.980                  | 28.5 | 29.5 | 0      | 1       | 6652.416                  | 33.5 | 32.5 | 1      | 2       |
| 6954.723                  | 39.5 | 38.5 | 0      | 1       | 6676.602                  | 31.5 | 31.5 | 1      | 2       |
| 6955.369                  | 26.5 | 27.5 | 0      | 1       | 6682.759                  | 14.5 | 15.5 | 1      | 2       |
| 6956.017                  | 55.5 | 54.5 | 0      | 1       | 6687.161                  | 30.5 | 31.5 | 1      | 2       |
| 6973.671                  | 24.5 | 24.5 | 0      | 1       | 6697.562                  | 19.5 | 19.5 | 1      | 2       |
| 6990.364                  | 22.5 | 23.5 | 0      | 1       | 6697.645                  | 29.5 | 30.5 | 1      | 2       |
| 6998.488                  | 21.5 | 21.5 | 0      | 1       | 6707.162                  | 18.5 | 18.5 | 1      | 2       |
| 6999.946                  | 51.5 | 50.5 | 0      | 1       | 6713.648                  | 40.5 | 39.5 | 1      | 2       |
| 7005.135                  | 9.5  | 9.5  | 0      | 1       | 6714.879                  | 40.5 | 40.5 | 1      | 2       |
| 7006.140                  | 20.5 | 20.5 | 0      | 1       | 6738.777                  | 16.5 | 17.5 | 1      | 2       |
| 7011.029                  | 8.5  | 8.5  | 0      | 1       | 6741.965                  | 14.5 | 14.5 | 1      | 2       |
| 7016.514                  | 7.5  | 7.5  | 0      | 1       | 6764.172                  | 11.5 | 11.5 | 1      | 2       |
| 7020.394                  | 18.5 | 19.5 | 0      | 1       | 6765.492                  | 20.5 | 19.5 | 1      | 2       |

Table S7 (continued)

| $\nu$ (cm <sup>-1</sup> ) | J'   | J''  | $\nu'$ | $\nu''$ | $\nu$ (cm <sup>-1</sup> ) | J'   | J''  | $\nu'$ | $\nu''$ |
|---------------------------|------|------|--------|---------|---------------------------|------|------|--------|---------|
| 6770.917                  | 34.5 | 33.5 | 1      | 2       | 6592.636                  | 5.5  | 5.5  | 2      | 3       |
| 6771.747                  | 19.5 | 18.5 | 1      | 2       | 6597.104                  | 6.5  | 7.5  | 2      | 3       |
| 6773.293                  | 33.5 | 32.5 | 1      | 2       | 6604.278                  | 3.5  | 2.5  | 2      | 3       |
| 6777.068                  | 9.5  | 9.5  | 1      | 2       | 6607.852                  | 4.5  | 3.5  | 2      | 3       |
| 6777.728                  | 20.5 | 21.5 | 1      | 2       | 6610.334                  | 10.5 | 10.5 | 2      | 3       |
| 6782.918                  | 8.5  | 8.5  | 1      | 2       | 6614.763                  | 9.5  | 9.5  | 2      | 3       |
| 6788.363                  | 7.5  | 7.5  | 1      | 2       | 6617.730                  | 17.5 | 16.5 | 2      | 3       |
| 6794.151                  | 31.5 | 31.5 | 1      | 2       | 6619.033                  | 22.5 | 21.5 | 2      | 3       |
| 6797.635                  | 14.5 | 13.5 | 1      | 2       | 6619.265                  | 16.5 | 15.5 | 2      | 3       |
| 6801.231                  | 1.5  | 2.5  | 1      | 2       | 6620.443                  | 15.5 | 14.5 | 2      | 3       |
| 6801.594                  | 9.5  | 10.5 | 1      | 2       | 6621.242                  | 14.5 | 13.5 | 2      | 3       |
| 6805.406                  | 12.5 | 11.5 | 1      | 2       | 6621.707                  | 12.5 | 11.5 | 2      | 3       |
| 6805.626                  | 28.5 | 27.5 | 1      | 2       | 6622.818                  | 7.5  | 7.5  | 2      | 3       |
| 6812.362                  | 1.5  | 1.5  | 1      | 2       | 6623.346                  | 21.5 | 20.5 | 2      | 3       |
| 6820.876                  | 3.5  | 3.5  | 1      | 2       | 6640.189                  | 16.5 | 16.5 | 2      | 3       |
| 6821.118                  | 27.5 | 26.5 | 1      | 2       | 6646.833                  | 0.5  | 0.5  | 2      | 3       |
| 6840.622                  | 43.5 | 42.5 | 1      | 2       | 6652.190                  | 6.5  | 6.5  | 2      | 3       |
| 6844.980                  | 3.5  | 4.5  | 1      | 2       | 6681.350                  | 8.5  | 7.5  | 2      | 3       |
| 6847.169                  | 22.5 | 22.5 | 1      | 2       | 6687.430                  | 10.5 | 9.5  | 2      | 3       |
| 6847.459                  | 16.5 | 15.5 | 1      | 2       | 6693.681                  | 26.5 | 25.5 | 2      | 3       |
| 6859.264                  | 19.5 | 18.5 | 1      | 2       |                           |      |      |        |         |
| 6862.618                  | 18.5 | 17.5 | 1      | 2       |                           |      |      |        |         |
| 6878.762                  | 10.5 | 9.5  | 1      | 2       |                           |      |      |        |         |
| 6879.719                  | 5.5  | 5.5  | 1      | 2       |                           |      |      |        |         |
| 6879.949                  | 8.5  | 7.5  | 1      | 2       |                           |      |      |        |         |
| 6880.146                  | 7.5  | 6.5  | 1      | 2       |                           |      |      |        |         |
| 6915.356                  | 29.5 | 28.5 | 1      | 2       |                           |      |      |        |         |
| 6918.229                  | 28.5 | 27.5 | 1      | 2       |                           |      |      |        |         |
| 6920.836                  | 12.5 | 11.5 | 1      | 2       |                           |      |      |        |         |
| 6922.969                  | 26.5 | 25.5 | 1      | 2       |                           |      |      |        |         |
| 6926.334                  | 15.5 | 14.5 | 1      | 2       |                           |      |      |        |         |
| 6926.423                  | 24.5 | 23.5 | 1      | 2       |                           |      |      |        |         |
| 6928.604                  | 22.5 | 21.5 | 1      | 2       |                           |      |      |        |         |
| 6499.499                  | 10.5 | 11.5 | 2      | 3       |                           |      |      |        |         |
| 6517.997                  | 24.5 | 24.5 | 2      | 3       |                           |      |      |        |         |
| 6526.381                  | 23.5 | 24.5 | 2      | 3       |                           |      |      |        |         |
| 6540.370                  | 13.5 | 14.5 | 2      | 3       |                           |      |      |        |         |
| 6543.467                  | 10.5 | 11.5 | 2      | 3       |                           |      |      |        |         |
| 6544.145                  | 19.5 | 18.5 | 2      | 3       |                           |      |      |        |         |
| 6557.941                  | 11.5 | 12.5 | 2      | 3       |                           |      |      |        |         |
| 6583.987                  | 10.5 | 9.5  | 2      | 3       |                           |      |      |        |         |
| 6584.810                  | 1.5  | 2.5  | 2      | 3       |                           |      |      |        |         |
| 6592.435                  | 25.5 | 24.5 | 2      | 3       |                           |      |      |        |         |

Table S8: Observed emission lines of the CH radical in the X<sup>2</sup>Π ground state

| $\nu$ (cm <sup>-1</sup> ) | J'   | J''  | $\nu'$ | $\nu''$ | F' | F'' | $\nu$ (cm <sup>-1</sup> ) | J'   | J''  | $\nu'$ | $\nu''$ | F' | F'' |
|---------------------------|------|------|--------|---------|----|-----|---------------------------|------|------|--------|---------|----|-----|
| 2513.872                  | 6.5  | 7.5  | 1      | 0       | 6  | 8   | 2729.863                  | 2.5  | 2.5  | 1      | 0       | 2  | 3   |
| 2514.197                  | 5.5  | 6.5  | 1      | 0       | 5  | 6   | 2730.183                  | 1.5  | 1.5  | 1      | 0       | 0  | 1   |
| 2514.428                  | 6.5  | 7.5  | 1      | 0       | 6  | 8   | 2731.926                  | 0.5  | 0.5  | 1      | 0       | 0  | 0   |
| 2535.198                  | 2.5  | 3.5  | 1      | 0       | 2  | 3   | 2736.074                  | 2.5  | 1.5  | 1      | 0       | 2  | 1   |
| 2536.167                  | 2.5  | 3.5  | 1      | 0       | 2  | 3   | 2749.537                  | 1.5  | 0.5  | 1      | 0       | 0  | 0   |
| 2547.568                  | 4.5  | 5.5  | 1      | 0       | 4  | 5   | 2749.674                  | 1.5  | 0.5  | 1      | 0       | 0  | 0   |
| 2547.937                  | 5.5  | 6.5  | 1      | 0       | 5  | 7   | 2785.113                  | 2.5  | 1.5  | 1      | 0       | 2  | 2   |
| 2548.079                  | 4.5  | 5.5  | 1      | 0       | 4  | 5   | 2797.010                  | 1.5  | 0.5  | 1      | 0       | 0  | 0   |
| 2548.409                  | 5.5  | 6.5  | 1      | 0       | 5  | 7   | 2806.756                  | 2.5  | 2.5  | 1      | 0       | 2  | 3   |
| 2550.550                  | 5.5  | 5.5  | 1      | 0       | 5  | 5   | 2810.799                  | 3.5  | 2.5  | 1      | 0       | 3  | 3   |
| 2580.646                  | 3.5  | 4.5  | 1      | 0       | 3  | 4   | 2810.996                  | 3.5  | 2.5  | 1      | 0       | 3  | 3   |
| 2581.193                  | 4.5  | 5.5  | 1      | 0       | 4  | 6   | 2812.968                  | 2.5  | 1.5  | 1      | 0       | 2  | 1   |
| 2581.583                  | 4.5  | 5.5  | 1      | 0       | 4  | 6   | 2813.204                  | 2.5  | 1.5  | 1      | 0       | 2  | 1   |
| 2584.140                  | 4.5  | 4.5  | 1      | 0       | 4  | 4   | 2835.242                  | 4.5  | 3.5  | 1      | 0       | 4  | 4   |
| 2595.962                  | 1.5  | 2.5  | 1      | 0       | 0  | 2   | 2836.115                  | 3.5  | 2.5  | 1      | 0       | 3  | 2   |
| 2599.821                  | 15.5 | 15.5 | 1      | 0       | 15 | 15  | 2855.856                  | 4.5  | 4.5  | 1      | 0       | 4  | 5   |
| 2612.718                  | 2.5  | 3.5  | 1      | 0       | 2  | 3   | 2857.813                  | 5.5  | 4.5  | 1      | 0       | 5  | 5   |
| 2613.062                  | 2.5  | 3.5  | 1      | 0       | 2  | 3   | 2858.141                  | 5.5  | 4.5  | 1      | 0       | 5  | 5   |
| 2613.613                  | 3.5  | 4.5  | 1      | 0       | 3  | 5   | 2858.538                  | 4.5  | 3.5  | 1      | 0       | 4  | 3   |
| 2613.914                  | 3.5  | 4.5  | 1      | 0       | 3  | 5   | 2858.885                  | 4.5  | 3.5  | 1      | 0       | 4  | 3   |
| 2643.436                  | 1.5  | 2.5  | 1      | 0       | 0  | 2   | 2862.009                  | 2.5  | 1.5  | 1      | 0       | 2  | 2   |
| 2645.247                  | 2.5  | 3.5  | 1      | 0       | 2  | 4   | 2862.504                  | 2.5  | 1.5  | 1      | 0       | 2  | 2   |
| 2645.404                  | 12.5 | 12.5 | 1      | 0       | 12 | 13  | 2877.906                  | 5.5  | 5.5  | 1      | 0       | 5  | 6   |
| 2658.778                  | 11.5 | 11.5 | 1      | 0       | 11 | 12  | 2879.754                  | 6.5  | 5.5  | 1      | 0       | 6  | 6   |
| 2659.520                  | 11.5 | 10.5 | 1      | 0       | 11 | 10  | 2879.883                  | 5.5  | 4.5  | 1      | 0       | 5  | 4   |
| 2664.883                  | 0.5  | 1.5  | 1      | 0       | 1  | 1   | 2880.283                  | 5.5  | 4.5  | 1      | 0       | 5  | 4   |
| 2667.875                  | 11.5 | 11.5 | 1      | 0       | 11 | 12  | 2899.653                  | 7.5  | 6.5  | 1      | 0       | 7  | 7   |
| 2676.357                  | 1.5  | 2.5  | 1      | 0       | 0  | 3   | 2917.844                  | 7.5  | 7.5  | 1      | 0       | 7  | 8   |
| 2678.687                  | 10.5 | 10.5 | 1      | 0       | 10 | 11  | 2918.928                  | 7.5  | 6.5  | 1      | 0       | 7  | 6   |
| 2682.487                  | 1.5  | 1.5  | 1      | 0       | 0  | 1   | 2919.102                  | 8.5  | 7.5  | 1      | 0       | 8  | 8   |
| 2682.711                  | 1.5  | 1.5  | 1      | 0       | 0  | 1   | 2919.424                  | 7.5  | 6.5  | 1      | 0       | 7  | 6   |
| 2690.858                  | 7.5  | 8.5  | 1      | 0       | 7  | 9   | 2935.753                  | 8.5  | 8.5  | 1      | 0       | 8  | 9   |
| 2692.158                  | 7.5  | 7.5  | 1      | 0       | 7  | 7   | 2936.285                  | 9.5  | 8.5  | 1      | 0       | 9  | 9   |
| 2697.364                  | 8.5  | 8.5  | 1      | 0       | 8  | 9   | 2966.456                  | 10.5 | 10.5 | 1      | 0       | 10 | 11  |
| 2701.386                  | 7.5  | 7.5  | 1      | 0       | 7  | 8   | 2993.358                  | 12.5 | 12.5 | 1      | 0       | 12 | 13  |
| 2703.722                  | 6.5  | 7.5  | 1      | 0       | 6  | 8   | 3003.078                  | 13.5 | 13.5 | 1      | 0       | 13 | 14  |
| 2705.242                  | 7.5  | 7.5  | 1      | 0       | 7  | 8   | 3019.696                  | 5.5  | 4.5  | 1      | 0       | 5  | 5   |
| 2709.129                  | 5.5  | 5.5  | 1      | 0       | 5  | 5   | 3020.854                  | 16.5 | 15.5 | 1      | 0       | 16 | 16  |
| 2709.264                  | 6.5  | 6.5  | 1      | 0       | 6  | 7   | 3027.096                  | 17.5 | 16.5 | 1      | 0       | 17 | 17  |
| 2711.189                  | 6.5  | 5.5  | 1      | 0       | 6  | 5   | 3027.819                  | 16.5 | 15.5 | 1      | 0       | 16 | 15  |
| 2712.420                  | 5.5  | 5.5  | 1      | 0       | 5  | 5   | 3035.017                  | 19.5 | 18.5 | 1      | 0       | 19 | 19  |
| 2726.181                  | 3.5  | 3.5  | 1      | 0       | 3  | 4   | 2522.374                  | 2.5  | 3.5  | 2      | 1       | 2  | 3   |
| 2727.193                  | 2.5  | 2.5  | 1      | 0       | 2  | 2   | 2526.297                  | 2.5  | 2.5  | 2      | 1       | 2  | 2   |

Table S8 (continued)

| $\nu$ (cm <sup>-1</sup> ) | J'   | J''  | $\nu'$ | $\nu''$ | F' | F'' | $\nu$ (cm <sup>-1</sup> ) | J'  | J'' | $\nu'$ | $\nu''$ | F' | F'' |
|---------------------------|------|------|--------|---------|----|-----|---------------------------|-----|-----|--------|---------|----|-----|
| 2552.370                  | 1.5  | 2.5  | 2      | 1       | 0  | 2   | 2616.430                  | 6.5 | 5.5 | 3      | 2       | 6  | 5   |
| 2552.504                  | 1.5  | 2.5  | 2      | 1       | 0  | 2   | 2616.778                  | 6.5 | 5.5 | 3      | 2       | 6  | 5   |
| 2571.869                  | 7.5  | 7.5  | 2      | 1       | 7  | 7   | 2616.921                  | 5.5 | 4.5 | 3      | 2       | 5  | 4   |
| 2586.501                  | 5.5  | 5.5  | 2      | 1       | 5  | 5   | 2634.736                  | 7.5 | 6.5 | 3      | 2       | 7  | 6   |
| 2595.727                  | 3.5  | 3.5  | 2      | 1       | 3  | 3   | 2635.120                  | 7.5 | 6.5 | 3      | 2       | 7  | 6   |
| 2600.191                  | 3.5  | 3.5  | 2      | 1       | 3  | 3   | 2652.187                  | 8.5 | 7.5 | 3      | 2       | 8  | 7   |
| 2600.894                  | 3.5  | 3.5  | 2      | 1       | 3  | 3   |                           |     |     |        |         |    |     |
| 2601.181                  | 2.5  | 2.5  | 2      | 1       | 2  | 2   |                           |     |     |        |         |    |     |
| 2603.707                  | 1.5  | 1.5  | 2      | 1       | 0  | 0   |                           |     |     |        |         |    |     |
| 2604.164                  | 1.5  | 1.5  | 2      | 1       | 0  | 0   |                           |     |     |        |         |    |     |
| 2605.884                  | 0.5  | 0.5  | 2      | 1       | 0  | 1   |                           |     |     |        |         |    |     |
| 2623.561                  | 1.5  | 0.5  | 2      | 1       | 0  | 1   |                           |     |     |        |         |    |     |
| 2669.003                  | 1.5  | 0.5  | 2      | 1       | 0  | 1   |                           |     |     |        |         |    |     |
| 2669.120                  | 1.5  | 0.5  | 2      | 1       | 0  | 0   |                           |     |     |        |         |    |     |
| 2678.077                  | 2.5  | 2.5  | 2      | 1       | 2  | 2   |                           |     |     |        |         |    |     |
| 2702.253                  | 3.5  | 3.5  | 2      | 1       | 3  | 3   |                           |     |     |        |         |    |     |
| 2726.617                  | 5.5  | 4.5  | 2      | 1       | 5  | 4   |                           |     |     |        |         |    |     |
| 2726.924                  | 5.5  | 4.5  | 2      | 1       | 5  | 4   |                           |     |     |        |         |    |     |
| 2727.327                  | 4.5  | 3.5  | 2      | 1       | 4  | 3   |                           |     |     |        |         |    |     |
| 2727.666                  | 4.5  | 3.5  | 2      | 1       | 4  | 3   |                           |     |     |        |         |    |     |
| 2730.963                  | 2.5  | 1.5  | 2      | 1       | 2  | 0   |                           |     |     |        |         |    |     |
| 2747.175                  | 6.5  | 5.5  | 2      | 1       | 6  | 5   |                           |     |     |        |         |    |     |
| 2747.539                  | 6.5  | 5.5  | 2      | 1       | 6  | 5   |                           |     |     |        |         |    |     |
| 2748.065                  | 5.5  | 4.5  | 2      | 1       | 5  | 4   |                           |     |     |        |         |    |     |
| 2783.013                  | 7.5  | 7.5  | 2      | 1       | 7  | 7   |                           |     |     |        |         |    |     |
| 2784.470                  | 8.5  | 7.5  | 2      | 1       | 8  | 7   |                           |     |     |        |         |    |     |
| 2785.246                  | 7.5  | 6.5  | 2      | 1       | 7  | 6   |                           |     |     |        |         |    |     |
| 2801.156                  | 9.5  | 8.5  | 2      | 1       | 9  | 8   |                           |     |     |        |         |    |     |
| 2801.396                  | 8.5  | 7.5  | 2      | 1       | 8  | 7   |                           |     |     |        |         |    |     |
| 2801.919                  | 8.5  | 7.5  | 2      | 1       | 8  | 7   |                           |     |     |        |         |    |     |
| 2843.136                  | 12.5 | 11.5 | 2      | 1       | 12 | 11  |                           |     |     |        |         |    |     |
| 2864.241                  | 13.5 | 12.5 | 2      | 1       | 13 | 12  |                           |     |     |        |         |    |     |
| 2880.032                  | 15.5 | 14.5 | 2      | 1       | 15 | 14  |                           |     |     |        |         |    |     |
| 2530.244                  | 2.5  | 1.5  | 3      | 2       | 2  | 0   |                           |     |     |        |         |    |     |
| 2553.943                  | 3.5  | 2.5  | 3      | 2       | 3  | 2   |                           |     |     |        |         |    |     |
| 2554.127                  | 3.5  | 2.5  | 3      | 2       | 3  | 2   |                           |     |     |        |         |    |     |
| 2555.986                  | 2.5  | 1.5  | 3      | 2       | 2  | 0   |                           |     |     |        |         |    |     |
| 2576.067                  | 4.5  | 3.5  | 3      | 2       | 4  | 3   |                           |     |     |        |         |    |     |
| 2576.310                  | 4.5  | 3.5  | 3      | 2       | 4  | 3   |                           |     |     |        |         |    |     |
| 2577.140                  | 3.5  | 2.5  | 3      | 2       | 3  | 2   |                           |     |     |        |         |    |     |
| 2577.418                  | 3.5  | 2.5  | 3      | 2       | 3  | 2   |                           |     |     |        |         |    |     |
| 2596.883                  | 5.5  | 4.5  | 3      | 2       | 5  | 4   |                           |     |     |        |         |    |     |
| 2597.179                  | 5.5  | 4.5  | 3      | 2       | 5  | 4   |                           |     |     |        |         |    |     |
